# Supplementary material for: Aggressive behaviour of psychiatric patients with mild and borderline intellectual disabilities in general mental health care
Source: PLoS One. 2022 Oct 3;17(10):e0272502. doi: 10.1371/journal.pone.0272502 (PMC9529125; doi:10.1371/journal.pone.0272502)
Supplement: S1 Data — (XLSX) [file pone.0272502.s001.xlsx]

## Sheet: Agression and MID BIF anonymous
order number	gender	first cse	SCILscore	ethnic_minority	type_ward	age_cat	age	young	middle	elderly	wards	inclusion	matchsequence_interview	wardtype	outpatient_dummy	admission_dummy	fact_dummy	Longstay_dummy	wardtype_opn_fact	PrimaryFirst	MatchSequence	marital_status	indic_BIF	SCIL_assessed	Scil_negative	Scil_positiev	scil_pos15_less	scil15	educational_level	elimentary_school	high_school	Number_years_school	Highest_school_level	Code_high_school	Doubt_education	Reading	Writing	axis1_1_last	axis1_2_last	axis_2_1_last	axis2_2_last	hdiag_as1_last	hdiag_as2_last	hdiag_last	Main_diagnosis	ICD10	severity_highest_as1	Developmental_disorder	No_disorder
3	1	1	14	1	2	0	34	1	0	0	1	1	0	1	0	0	1	0	1	1	0	99	1	1	0	0	1	1	1	0	0		VMBO electra	4	1	99	99	295.7	300.21	2271.09	0	0	0	0	schizoaffective disorder: Depressieve type	2	6	0	0
4	2	1	26	0	2	1	46	0	1	0	1	1	0	1	0	0	1	0	1	1	0	4	0	1	1	0	0	0	0	0	0		HAVO	8	0	0	0	295.3	0	301.9	0	0	0	0	schizophrenia: paranoidtype	2	6	0	0
5	2	1	25	0	2	1	59	0	1	0	1	1	0	1	0	0	1	0	1	1	0	3	0	1	1	0	0	0	0	0	0		HAVO directieseretaresse kleuterkweek	8	0	0	0	309.81	0	301.6	301.9	0	0	0	PTDS chronic	4	11	0	0
6	2	1	24	0	2	1	46	0	1	0	1	1	0	1	0	0	1	0	1	1	0	6	0	1	1	0	0	0	0	0	0		MAVO	6	0	0	0	295.4	309.81	301.83	0	0	0	0	Psychotic disorder NAO	2	5	0	0
7	2	1	14	0	2	1	46	0	1	0	1	1	0	1	0	0	1	0	1	1	0	99	1	1	0	0	1	1	1	0	0		LHNO	4	0	0	0	309.81	296.3	301.9	0	0	0	0	Personality disorder nao	6	0	0	0
8	2	1	99	0	2	2	65	0	0	1	1	1	0	1	0	0	1	0	1	1	0	3	99	0	9	9	9	9	0	1	2		mavo	6	0	99	99	2261.2	2261.2	301.83	0	0	0	0	Borderline personality disorder	6	0	0	1
9	2	1	99	0	2	1	42	0	1	0	1	1	0	1	0	0	1	0	1	1	0	2	99	0	9	9	9	9	9	1	2		Onbekend	99	99	99	99	295.7	0	301.9	0	0	0	0	Schizoaffective disorder: Bipolar type	2	6	0	0
10	2	1	10	0	2	1	57	0	1	0	1	1	0	1	0	0	1	0	1	1	0	99	1	1	0	0	1	1	1	1	1		geen	0	0	0	1	314.01	309.81	317	301	0	0	0	Posttraumatic stress- disorder	4	11	1	0
11	1	1	25	0	2	1	56	0	1	0	1	1	0	1	0	0	1	0	1	1	0	1	0	1	1	0	0	0	1	0	0		assistent hovenier	3	1	0	0	293.82	0	2271.09	0	0	0	0	Psychotic disorder door with delusions	2	5	0	0
12	1	1	18	0	2	0	31	1	0	0	1	1	0	1	0	0	1	0	1	1	0	1	1	1	0	1	0	0	1	0	0	5	MAVO	5	1	0	0	295.6	0	2271.09	0	0	0	0	schizophrenia: resttype	2	6	0	0
15	2	1	22	0	2	0	34	1	0	0	1	1	0	1	0	0	1	0	1	1	0	99	0	1	1	0	0	0	1	0	0	4	MBO	4	1	0	0	296.31	300.02	2262.89	301.82	0	0	0	avoidant personality disorder	6	0	0	0
16	1	1	22	0	2	0	32	1	0	0	1	1	0	1	0	0	1	0	1	1	0	99	0	1	1	0	0	0	1	0	0	4	MBO	4	1	0	0	295.9	2215.81	301.82	0	0	0	0	Borderline personality disorder	6	0	0	0
17	1	1	15	0	2	1	49	0	1	0	1	1	0	1	0	0	1	0	1	1	0	99	1	1	0	0	1	1	1	0	0	4	MBO	4	1	0	0	296.33	304.8	301.22	0	0	0	0	Schizotypic personality disorder	2	6	0	0
19	2	1	20	0	2	1	46	0	1	0	1	1	0	1	0	0	1	0	1	1	0	2	0	1	1	0	0	0	1	0	0	5	LEAO	4	0	0	0	300.23	0	301.9	301.6	0	0	0	Personality disorder nao	6	0	0	0
20	1	1	22	0	2	2	62	0	0	1	1	1	0	1	0	0	1	0	1	1	0	99	0	1	1	0	0	0	1	0	0	3	MBO	4	1	0	0	305	314.01	301.83	0	0	0	0	Borderline personality disorder	6	0	1	0
21	1	1	24	0	2	2	65	0	0	1	1	1	0	1	0	0	1	0	1	1	0	99	0	1	1	0	0	0	1	0	0	4	MBO hotelschool	4	1	0	0	295.9	0	2271.09	0	0	0	0	Schizoaffective disorder: Bipolar type	2	6	0	0
22	2	1	24	0	2	1	42	0	1	0	1	1	0	1	0	0	1	0	1	1	0	1	0	1	1	0	0	0	0	0	0	9	MBO 4	7	0	0	0	309.81	296.32	799.9	0	0	0	0	Depressieve disorder: Recidive Medium	3	3	0	0
23	2	1	23	0	2	1	52	0	1	0	1	1	0	1	0	0	1	0	1	1	0	1	0	1	1	0	0	0	1	0	0	3	LEAO	4	0	0	0	296.31	0	301.83	0	0	0	0	Depressieve disorder: Recidive light	3	3	0	0
24	1	1	21	0	2	0	30	1	0	0	1	1	1	1	0	0	1	0	1	1	0	99	0	1	1	0	0	0	1	0	0	4	MBO	4	1	0	0	299.8	300.4	2271.09	0	0	0	0	Asperger	9	9	1	0
25	2	1	24	0	2	1	50	0	1	0	1	1	0	1	0	0	1	0	1	1	0	1	0	1	1	0	0	0	0	0	0	8	HAVO	8	0	0	0	295.7	0	2271.09	0	0	0	0	Schizoaffective disorder: Bipolar type	2	6	0	0
26	2	1	27	0	2	0	33	1	0	0	1	1	0	1	0	0	1	0	1	1	0	1	0	1	1	0	0	0	1	0	0	6	3 VWO afgemaakt	1	0	0	0	300.4	307.5	301.9	0	0	0	0	Dysthyme disorder: early start	3	3	0	0
27	2	1	23	0	2	1	49	0	1	0	1	1	0	1	0	0	1	0	1	1	0	99	0	1	1	0	0	0	1	0	0	3	basisschool	1	0	0	0	309.81	2261.2	301.82	0	0	0	0	PTDS chronic	4	11	0	0
28	1	1	6	1	2	1	53	0	1	0	1	1	0	1	0	0	1	0	1	1	0	99	1	1	0	0	1	1	1	1	1		taalschool	1	1	1	1	295.9	0	301.82	0	0	0	0	schizophrenia: Ongedifferentieerde type, Episodic with rest symptoms	2	6	0	0
29	1	1	15	0	2	1	48	0	1	0	1	1	0	1	0	0	1	0	1	1	0	99	1	1	0	0	1	1	1	0	0	7	k MBO schilder	4	0	0	0	300	307.23	301.9	0	0	0	0	Anxiety disorder NAO	4	2	0	0
30	2	1	23	0	2	2	62	0	0	1	1	1	0	1	0	0	1	0	1	1	0	99	0	1	1	0	0	0	1	0	0	4	MAVO	5	1	0	0	297.1	298.9	2271.09	0	0	0	0	Psychotic disorder NAO	2	5	0	0
31	1	1	17	0	2	1	41	0	1	0	1	1	0	1	0	0	1	0	1	1	0	1	1	1	0	1	0	0	0	0	0		HBO marketing	10	0	0	0	295.9	0	2271.09	0	0	0	0	schizophrenia: paranoidtype	2	6	0	0
32	2	1	25	0	2	1	48	0	1	0	1	1	0	1	0	0	1	0	1	1	0	2	0	1	1	0	0	0	0	0	0	7	VWO	9	0	0	0	299.8	0	301.83	0	0	0	0	schizophrenia: paranoidtype	2	6	1	0
33	1	1	7	0	2	0	35	1	0	0	1	1	1	1	0	0	1	0	1	1	0	1	1	1	0	0	1	1	1	0	0	4	KOK school	4	1	0	0	295.9	305.2	317	0	0	0	0	schizophrenia: paranoidtype	2	6	0	0
34	1	1	12	0	2	2	64	0	0	1	1	1	0	1	0	0	1	0	1	1	0	1	1	1	0	0	1	1	1	1	1	0	geen opleiding	0	0	0	0	295.7	0	317	0	0	0	0	Schizoaffective disorder: Bipolar type	2	6	0	0
35	2	1	21	0	2	0	25	1	0	0	1	1	0	1	0	0	1	0	1	1	0	99	0	1	1	0	0	0	1	0	0	4	VMBO	4	1	0	0	300.81	309.81	301.83	301.83	0	0	0	Borderline personality disorder	6	0	0	0
36	1	1	24	0	2	1	50	0	1	0	1	1	1	1	0	0	1	0	1	1	0	1	0	1	1	0	0	0	0	0	0	12	universiteit tuinbouw	11	0	0	0	295.3	304.1	2271.09	0	0	0	0	schizophrenia: paranoidtype	2	6	0	0
37	2	1	19	0	2	0	26	1	0	0	1	1	0	1	0	0	1	0	1	1	0	99	1	1	0	1	0	0	1	0	0	4	VMBO	4	1	0	0	309.81	0	2262.89	0	0	0	0	PTSD NOS	4	11	0	0
38	2	1	17	1	2	0	34	1	0	0	1	1	0	1	0	0	1	0	1	1	0	6	1	1	0	1	0	0	0	0	0	4	MAVO	6	0	0	0	309.81	0	317	301.83	0	0	0	PTDS chronic	4	11	0	0
39	1	1	24	0	2	1	38	0	1	0	1	1	0	1	0	0	1	0	1	1	0	99	0	1	1	0	0	0	0	0	0	4	MBO+	7	0	0	0	296.36	299.8	2271.09	0	0	0	0	PDD NOS	9	9	1	0
40	1	1	8	1	2	2	61	0	0	1	1	1	0	1	0	0	1	0	1	1	0	99	1	1	0	0	1	1	1	1	1	0	niks	1	0	0	0	304.8	295.3	2271.09	0	0	0	0	schizophrenia: paranoidtype	2	6	0	0
41	1	1	6	1	2	1	53	0	1	0	1	1	0	1	0	0	1	0	1	1	0	99	1	1	0	0	1	1	1	1	1	5	5e klas	1	0	1	1	305	312.3	799.9	0	0	0	0	impuls disorderr NAO	0	1	0	0
42	1	1	12	0	2	1	38	0	1	0	1	1	0	1	0	0	1	0	1	1	0	4	1	1	0	0	1	1	1	0	0	4	IVBO	3	0	0	0	299	0	2262.89	0	0	0	0	Autistic disorder	9	9	1	0
43	1	1	10	1	2	1	42	0	1	0	1	1	0	1	0	0	1	0	1	1	0	99	1	1	0	0	1	1	0	1	0		politieacademie in Turkije	10	0	0	1	309.81	2261.1			0	0	0	PTDS chronic	4	11	0	0
44	2	1	17	0	2	1	41	0	1	0	1	1	0	1	0	0	1	0	1	1	0	99	1	1	0	1	0	0	0	0	0	4	MAVO	6	0	0	0	296.03	0	799.9	0	0	0	0	Bipolar I disorder	3	4	0	0
45	1	1	15	0	2	1	36	0	1	0	1	1	0	1	0	0	1	0	1	1	0	1	1	1	0	0	1	1	1	0	0	3	MBO niveau 2	4	0	0	0	298.9	300.23	301.9	0	0	0	0	Social phobia	4	2	0	0
46	2	1	19	1	2	1	43	0	1	0	1	1	0	1	0	0	1	0	1	1	0	6	1	1	0	1	0	0	1	0	0	3	lagere school	1	0	0	0	295.3	0	2271.09	0	0	0	0	schizophrenia: paranoidtype	2	6	0	0
47	2	1	23	0	2	0	33	1	0	0	1	1	0	1	0	0	1	0	1	1	0	1	0	1	1	0	0	0	0	0	0	4	MBO niveau 4	7	0	0	0	300.4	307.5	301.83	301.82	0	0	0	Borderline personality disorder	6	0	0	0
48	2	1	20	0	2	1	44	0	1	0	1	1	0	1	0	0	1	0	1	1	0	2	0	1	1	0	0	0	1	0	0	6	kappersopleiding	4	1	0	0	296.32	309.81	301.83	317	0	0	0	Depressieve disorder	3	3	0	0
49	2	1	19	0	2	1	40	0	1	0	1	1	0	1	0	0	1	0	1	1	0	1	1	1	0	1	0	0	0	0	0	6	MBO verpleegkundige	7	0	0	0	295.7	309.81	2271.09	0	0	0	0	Schizoaffective disorder: Bipolar type	2	6	0	0
50	1	1	23	0	2	1	50	0	1	0	1	1	0	1	0	0	1	0	1	1	0	99	0	1	1	0	0	0	1	0	0	5	LHNO	4	0	0	0	293.9	312.3	301.7	0	0	0	0	Dysthyme disorder: early start	3	3	0	0
51	1	1	18	0	2	1	49	0	1	0	1	1	0	1	0	0	1	0	1	1	0	2	1	1	0	1	0	0	1	0	0	6	LTS	4	0	0	0	312.3	314.9	301.9	0	0	0	0	Personality disorder nao	6	0	1	0
52	1	1	11	0	2	0	30	1	0	0	1	1	0	1	0	0	1	0	1	1	0	99	1	1	0	0	1	1	1	1	1	9	middelbaar onderwijs	4	1	1	1	298.9	0	2271.09	0	0	0	0	Psychotic disorder NAO	2	5	0	0
53	1	1	24	0	2	1	41	0	1	0	1	1	0	1	0	0	1	0	1	1	0	99	0	1	1	0	0	0	0	0	0	5	MAVO	6	0	0	0	295.6	304.3	2271.09	0	0	0	0	schizophrenia: Resttype	2	6	0	0
54	1	1	20	0	2	1	48	0	1	0	1	1	0	1	0	0	1	0	1	1	0	99	0	1	1	0	0	0	1	0	0	5	LTS	4	0	0	0	295.9	0	317	0	0	0	0	schizophrenia: undiff type	2	6	0	0
55	1	1	17	1	2	0	34	1	0	0	1	1	0	1	0	0	1	0	1	1	0	99	1	1	0	1	0	0	1	1	1	3	LTS	4	0	0	0	295.3	0	799.9	0	0	0	0	schizophrenia: paranoidtype	2	6	0	0
56	2	1	12	0	2	1	52	0	1	0	1	1	0	1	0	0	1	0	1	1	0	99	1	1	0	0	1	1	1	1	1		LBO	4	0	0	1	295.9	0	2271.09	0	0	0	0	schizophrenia: Resttype	2	6	0	0
57	2	1	21	0	2	1	47	0	1	0	1	1	0	1	0	0	1	0	1	1	0	99	0	1	1	0	0	0	0	0	0	5	HBO directiesecretaresse	10	0	0	0	296.44	0	2271.09	0	0	0	0	Bipolaire I disorder	3	4	0	0
58	1	1	16	0	2	1	56	0	1	0	1	1	0	1	0	0	1	0	1	1	0	2	1	1	0	1	0	0	1	0	0	2	koksschool	4	1	0	0	311	309.81	301.9	0	0	0	0	Depressieve disorder NAO	3	3	0	0
59	1	1	23	0	2	2	61	0	0	1	1	1	0	1	0	0	1	0	1	1	0	99	0	1	1	0	0	0	1	0	0	4	LTS	4	0	0	0	296.4				0	0	0	Bipolaire I disorder	3	4	0	0
60	2	1	19	0	2	2	61	0	0	1	1	1	0	1	0	0	1	0	1	1	0	1	1	1	0	1	0	0	1	0	0	4	huishoudschool zorg	4	0	0	0	309.81	296.3	301.83	301.6	0	0	0	Posttraumatic stress- disorder	4	11	0	0
62	2	1	16	1	2	1	41	0	1	0	1	1	0	1	0	0	1	0	1	1	0	99	1	1	0	1	0	0	1	1	1		MBO niveau 2	4	0	0	0	309.81	2261.2	317	301.9	0	0	0	PTDS chronic	4	11	0	0
63	2	1	19	0	2	0	32	1	0	0	1	1	1	1	0	0	1	0	1	1	0	99	1	1	0	1	0	0	1	0	0	4	MBO niveau 2	4	0	0	0	299.8	309.81	799.9	0	0	0	0	schizophrenia: desorganized	2	6	1	0
64	2	1	21	0	2	1	55	0	1	0	1	1	0	1	0	0	1	0	1	1	0	3	0	1	1	0	0	0	0	0	0	6	MBO 4	7	0	0	0	300.3	300.4	301.9	0	0	0	0	Personality disorder nao	6	0	0	0
65	2	1	17	0	2	1	40	0	1	0	1	1	0	1	0	0	1	0	1	1	0	1	1	1	0	1	0	0	0	0	0	4	Mdgo	7	0	0	0	298.9	309.81	2262.89	0	0	0	0	Psychotic disorder NAO	2	5	0	0
67	1	1	15	0	2	2	70	0	0	1	1	1	0	1	0	0	1	0	1	1	0	99	1	1	0	0	1	1	0	0	0	5	HBO aannemer	10	0	0	0	296.43	0	2271.09	0	0	0	0	Bipolaire I disorder: Laatste episode manisch, Ernstig met psychotische kenmerken	3	4	0	0
68	2	1	19	0	2	1	56	0	1	0	1	1	0	1	0	0	1	0	1	1	0	3	1	1	0	1	0	0	1	0	0	3	huishoudschool + extra jaar gezinshelpende	4	0	0	0	295.7	0	317	0	0	0	0	Schizoaffective disorder: Bipolar type	2	6	0	0
69	2	1	10	1	2	1	55	0	1	0	1	1	0	1	0	0	1	0	1	1	0	99	1	1	0	0	1	1	0	1	1		docent in Afghanistan	10	1	1	1	296.66	0	2271.09	0	0	0	0	Bipolaire I disorder: Laatste episode gemengd, Ernstig met psychotische kenmerken	3	4	0	0
70	2	1	12	0	2	1	48	0	1	0	1	1	0	1	0	0	1	0	1	1	0	2	1	1	0	0	1	1	1	0	0	4	huishoudschool	4	0	0	0	297.1	0	2271.09	0	0	0	0	Waan disorder: Achtervolgingstype	2	6	0	0
71	1	1	26	0	2	0	31	1	0	0	1	1	1	1	0	0	1	0	1	1	0	2	0	1	1	0	0	0	0	0	0	6	HAVO	8	0	0	0	295.7	296.9	2271.09	0	0	0	0	Schizoaffective disorder: Bipolar type	2	6	0	0
72	2	1	4	0	2	1	56	0	1	0	1	1	0	1	0	0	1	0	1	1	0	3	1	1	0	0	1	1	1	0	0	3	lagere school	1	0	0	1	296.8	296.66	301.83	2262.89	0	0	0	Bipolaire I disorder: Laatste episode hypomaan	3	4	0	0
73	2	1	21	0	2	1	50	0	1	0	1	1	0	1	0	0	1	0	1	1	0	99	0	1	1	0	0	0	0	0	0	4	MAVO	6	0	0	0	298.9	309.81	301.83	0	0	0	0	Borderline personality disorder	6	0	0	0
74	2	1	21	1	2	1	45	0	1	0	1	1	1	1	0	0	1	0	1	1	0	99	0	1	1	0	0	0	0	0	0	6	MAVO	6	0	0	0	297.1	297.1	2271.09	0	0	0	0	Schizofreniforme disorder: Zonder gunstige prognostische kenmerken	2	6	0	0
75	1	1	28	0	2	1	55	0	1	0	1	1	0	1	0	0	1	0	1	1	0	99	0	1	1	0	0	0	0	0	0	6	WO theologie 5e jaar	11	0	0	0	295.7	0	2271.09	0	0	0	0	Schizoaffective disorder: Bipolar type	2	6	0	0
76	1	1	4	0	2	1	53	0	1	0	1	1	0	1	0	0	1	0	1	1	0	99	1	1	0	0	1	1	1	0	0	3	lagere school	1	0	0	0	296.4	0	2262.89	0	0	0	0	Bipolaire I disorder: Laatste episode hypomaan	3	4	0	0
77	1	1	21	0	2	1	54	0	1	0	1	1	0	1	0	0	1	0	1	1	0	99	0	1	1	0	0	0	1	0	0	4	LTS	4	0	0	0	296.89	0	2271.09	0	0	0	0	Bipolaire II disorder	3	4	0	0
78	1	1	19	0	2	2	68	0	0	1	1	1	0	1	0	0	1	0	1	1	0	1	1	1	0	1	0	0	1	0	0	3	lagere school	1	0	0	0	296.89	309.81	2271.09	0	0	0	0	Bipolaire II disorder	3	4	0	0
79	2	1	24	0	2	0	32	1	0	0	1	1	0	1	0	0	1	0	1	1	0	1	0	1	1	0	0	0	0	0	0	5	MAVO	6	0	0	0	309.81	314	301.83	0	0	0	0	Aandachtstekort disorder met hyperactiviteit: Overwegend onoplettendheid type	9	9	1	0
80	2	1	18	0	2	2	62	0	0	1	1	1	0	1	0	0	1	0	1	1	0	2	1	1	0	1	0	0	0	0	0	3	OVB verzorgende beroepen	7	0	0	0	311	300.81	301.9	0	0	0	0	Ongedifferentieerde somatoforme disorder	4	2	0	0
81	1	1	27	0	2	1	44	0	1	0	1	1	0	1	0	0	1	0	1	1	0	1	0	1	1	0	0	0	0	0	0	4	MTS	7	0	0	0	303.9	299.8	2271.09	0	0	0	0	Pervasieve ontwikkelings disorder NAO	9	9	1	0
82	1	1	24	0	2	1	48	0	1	0	1	1	0	1	0	0	1	0	1	1	0	1	0	1	1	0	0	0	1	0	0	6	basisschool	1	0	0	0	298.9	297.1	301.81	0	0	0	0	schizophrenia: paranoidtype	2	6	0	0
83	2	1	6	0	2	1	50	0	1	0	1	1	0	1	0	0	1	0	1	1	0	2	1	1	0	0	1	1	1	1	1	0	geen, ook geen lagere school	0	0	1	1	300.81	311	301.9	301.6	0	0	0	Personality disorder nao	6	0	0	0
85	1	1	25	0	2	1	44	0	1	0	1	1	0	1	0	0	1	0	1	1	0	99	0	1	1	0	0	0	0	0	0	6	VWO	9	0	0	0	295.7	300.3	2271.09	0	0	0	0	Schizoaffective disorder: Bipolar type	2	6	0	0
86	1	1	23	0	2	1	40	0	1	0	1	1	0	1	0	0	1	0	1	1	0	99	0	1	1	0	0	0	1	0	0	4	MBO	4	1	0	0	296.53	0	2271.09	0	0	0	0	Bipolaire I disorder: Laatste episode gemengd, Ernstig met psychotische kenmerken	3	4	0	0
87	2	1	27	0	2	2	62	0	0	1	1	1	0	1	0	0	1	0	1	1	0	99	0	1	1	0	0	0	0	0	0	5	MTS	7	0	0	0	296.4	304.3	301.9	0	0	0	0	Bipolaire I disorder: Laatste episode niet-gespecificeerd	3	4	0	0
88	2	1	15	0	2	1	55	0	1	0	1	1	0	1	0	0	1	0	1	1	0	99	1	1	0	0	1	1	9	0	0	3	VOC	99	99	0	0	296.32	307.1	301.83	301.6	0	0	0	Borderline personality disorder	6	0	0	0
89	2	1	20	0	2	1	51	0	1	0	1	1	0	1	0	0	1	0	1	1	0	99	0	1	1	0	0	0	1	0	0	4	LHNO	4	0	0	0	309.81	2262.2	301.83	301.4	0	0	0	Borderline personality disorder	6	0	0	0
90	2	1	17	0	2	0	32	1	0	0	1	1	1	1	0	0	1	0	1	1	0	99	1	1	0	1	0	0	1	0	0	4	MBO	4	1	0	0	309.81	314.01	301.9	0	0	0	0	Personality disorder nao	6	0	1	0
91	1	1	14	1	2	1	41	0	1	0	1	1	0	1	0	0	1	0	1	1	0	99	1	1	0	0	1	1	1	0	0	2	niks	1	0	0	0	295.9	0	2271.09	0	0	0	0	schizophrenia: paranoidtype, Episodisch met restsymptomen tussen de episoden	2	6	0	0
92	2	1	26	0	2	1	42	0	1	0	1	1	0	1	0	0	1	0	1	1	0	99	0	1	1	0	0	0	0	0	0	3	HBO	10	0	0	0	309.81	296.32	301.83	0	0	0	0	Borderline personality disorder	6	0	0	0
93	2	1	14	0	2	1	59	0	1	0	1	1	0	1	0	0	1	0	1	1	0	2	1	1	0	0	1	1	0	0	0	4	HBO	10	0	0	0	309.81	0	301.9	0	0	0	0	PTDS chronic	4	11	0	0
94	1	1	99	0	2	1	38	0	1	0	1	1	0	1	0	0	1	0	1	1	0	2	99	0	9	9	9	9	0	0	0	4	MTS	7	0	0	0	299.8	0	799.9	0	0	0	0	Asperger	9	9	1	0
95	2	1	18	0	2	1	49	0	1	0	1	1	0	1	0	0	1	0	1	1	0	99	1	1	0	1	0	0	1	0	0	6	huishoudschool INTAS	4	0	0	0	296.56	0	2271.09	0	0	0	0	Bipolaire I disorder: Laatste episode manisch, Volledig in remissie	3	4	0	0
96	2	1	20	1	2	0	35	1	0	0	1	1	1	1	0	0	1	0	1	1	0	99	0	1	1	0	0	0	0	1	0	4	MAVO	6	0	0	0	295.9	309.81	301.9	0	0	0	0	schizophrenia: paranoidtype, Ononderbroken	2	6	0	0
97	1	1	25	0	2	0	31	1	0	0	1	1	0	1	0	0	1	0	1	1	0	99	0	1	1	0	0	0	1	0	0	4	MBO	4	1	0	0	296.3	300.23	301.82	0	0	0	0	avoidant personality disorder	6	0	0	0
98	2	1	21	0	2	1	45	0	1	0	1	1	0	1	0	0	1	0	1	1	0	2	0	1	1	0	0	0	0	0	0	2	MAVO	6	0	0	0	296.4	299.8	301.9	0	0	0	0	Bipolaire I disorder: Laatste episode hypomaan	3	4	1	0
99	2	1	24	0	2	0	33	1	0	0	1	1	0	1	0	0	1	0	1	1	0	99	0	1	1	0	0	0	1	0	0	5	MBO niveau 2	4	0	0	0	295.9	0	2271.09	0	0	0	0	schizophrenia: Resttype	2	6	0	0
100	2	1	6	1	2	1	47	0	1	0	1	1	0	1	0	0	1	0	1	1	0	99	1	1	0	0	1	1	1	1	1	0	geen opleiding	0	0	1	1	298.9	0	2271.09	0	0	0	0	schizophrenia: paranoidtype	2	6	0	0
101	1	1	15	1	2	0	32	1	0	0	1	1	0	1	0	0	1	0	1	1	0	1	1	1	0	0	1	1	1	1	1		4 jaar onderwijs in Afghanistan	1	0	0	1	295.2	0	2271.09	0	0	0	0	schizophrenia: katatone type	2	6	0	0
102	2	1	22	0	2	1	40	0	1	0	1	1	0	1	0	0	1	0	1	1	0	3	0	1	1	0	0	0	1	0	0	5	basisschool	1	0	0	0	298.9	2261.1	2271.09	0	0	0	0	Psychotic disorder NAO	2	5	0	0
103	1	1	22	0	2	0	26	1	0	0	1	1	0	1	0	0	1	0	1	1	0	99	0	1	1	0	0	0	1	0	0	2	basisschool	1	0	0	0	295.7	314	301.22	0	0	0	0	Psychotic disorder NAO	2	5	1	0
104	2	1	24	0	2	2	63	0	0	1	1	1	0	1	0	0	1	0	1	1	0	99	0	1	1	0	0	0	1	0	0	4	MULO	5	1	0	0	296.56	0	2271.09	0	0	0	0	Bipolaire I disorder: Laatste episode depressief, Volledig in remissie	3	4	0	0
105	2	1	24	0	2	1	39	0	1	0	1	1	0	1	0	0	1	0	1	1	0	2	0	1	1	0	0	0	0	0	0	4	HBO PABO	10	0	0	0	299	296.36	301.83	0	0	0	0	Autistische disorder	9	9	1	0
106	1	1	20	0	2	1	54	0	1	0	1	1	0	1	0	0	1	0	1	1	0	99	0	1	1	0	0	0	1	0	0	4	LTS	4	0	0	0	296.8	0	2271.09	0	0	0	0	Bipolaire I disorder: Laatste episode niet-gespecificeerd	3	4	0	0
107	1	1	8	0	2	1	53	0	1	0	1	1	0	1	0	0	1	0	1	1	0	1	1	1	0	0	1	1	1	0	1	0	basisschool	1	0	0	0	300.9	314.01	318	0	0	0	0	Bipolaire disorder NAO	3	4	1	0
108	2	1	11	0	2	1	50	0	1	0	1	1	0	1	0	0	1	0	1	1	0	2	1	1	0	0	1	1	1	0	0	3	basisschool	1	0	0	0	300.02	0	0	0	0	0	0	Paniek disorder met agorafobie	4	2	0	1
109	1	1	99	0	2	1	52	0	1	0	1	1	0	1	0	0	1	0	1	1	0	99	99	0	9	9	9	9	9	1	1	0	onbekend	99	99	0	0	295.9	0	2271.09	0	0	0	0	schizophrenia: Gedesorganiseerde type, Ander of niet gespecificeerd patroon	2	6	0	0
110	2	1	27	0	2	1	49	0	1	0	1	1	0	1	0	0	1	0	1	1	0	2	0	1	1	0	0	0	0	0	0	4	autorijschool	7	1	0	0	2261.2	0	301	0	0	0	0	Paranoide persoonlijkheids disorder	6	0	0	1
111	2	1	24	0	2	2	63	0	0	1	1	1	0	1	0	0	1	0	1	1	0	99	0	1	1	0	0	0	0	0	0	6	HAVO	8	0	0	0	296.32	0	0	0	0	0	0	Depressieve disorder: Recidiverend, Ernstig met psychotische kenmerken	3	3	0	0
112	1	1	24	0	2	0	30	1	0	0	1	1	0	1	0	0	1	0	1	1	0	99	0	1	1	0	0	0	0	0	0	5	HBO	10	0	0	0	298.9	0	799.9	0	0	0	0	Psychotic disorder NAO	2	5	0	0
113	1	1	20	0	2	1	41	0	1	0	1	1	0	1	0	0	1	0	1	1	0	6	0	1	1	0	0	0	0	0	0	4	MEAO MBO	7	0	0	0	296.8	0	2271.09	0	0	0	0	Bipolaire disorder NAO	3	4	0	0
114	2	1	21	0	2	1	56	0	1	0	1	1	0	1	0	0	1	0	1	1	0	99	0	1	1	0	0	0	1	0	0	3	dameskapster	4	1	0	0	298.9	0	2271.09	0	0	0	0	Psychotic disorder NAO	2	5	0	0
115	2	1	24	0	2	2	62	0	0	1	1	1	0	1	0	0	1	0	1	1	0	99	0	1	1	0	0	0	0	0	0	4	HBO sociaal cultureel	10	0	0	0	296.8	0	2271.09	0	0	0	0	Bipolaire I disorder: Laatste episode niet-gespecificeerd	3	4	0	0
116	1	1	16	0	2	1	59	0	1	0	1	1	0	1	0	0	1	0	1	1	0	99	1	1	0	1	0	0	1	0	0	3	LTS detailhandel	4	0	0	0	296.36	300	301.4	0	0	0	0	Obsessieve-compulsieve persoonlijkheids disorder	6	0	0	0
117	2	1	24	0	2	1	38	0	1	0	1	1	0	1	0	0	1	0	1	1	0	1	0	1	1	0	0	0	0	0	0	7	HAVO	8	0	0	0	300	299.8	301.9	0	0	0	0	Anxiety disorder NAO	4	2	1	0
118	1	1	28	0	2	0	32	1	0	0	1	1	0	1	0	0	1	0	1	1	0	3	0	1	1	0	0	0	0	0	0	5	HAVO	8	0	0	0	311	2262.81	799.9	0	0	0	0	Depressieve disorder: Eenmalige episode, Niet-gespecificeerd	3	3	0	0
119	1	1	16	0	2	1	56	0	1	0	1	1	0	1	0	0	1	0	1	1	0	99	1	1	0	1	0	0	0	0	0	6	MTS	7	0	0	0	299	309.81	799.9	0	0	0	0	PDD NOS	9	9	1	0
120	1	1	23	0	2	1	45	0	1	0	1	1	0	1	0	0	1	0	1	1	0	1	0	1	1	0	0	0	1	0	0	4	LTS	4	0	0	0	295.7	0	301.4	0	0	0	0	Schizoaffective disorder: Bipolar type	2	6	0	0
121	2	1	24	0	2	1	49	0	1	0	1	1	0	1	0	0	1	0	1	1	0	2	0	1	1	0	0	0	0	0	0	6	VWO	9	0	0	0	298.9	0	301	0	0	0	0	Paranoide persoonlijkheids disorder	6	0	0	0
122	2	1	26	0	2	1	49	0	1	0	1	1	0	1	0	0	1	0	1	1	0	99	0	1	1	0	0	0	1	0	0	3	lagere school	1	0	0	0	309.81	300.4	799.9	0	0	0	0	Posttraumatic stress- disorder	4	11	0	0
123	1	1	8	0	2	0	33	1	0	0	1	1	0	1	0	0	1	0	1	1	0	99	1	1	0	0	1	1	1	0	0	4	lager onderwijs	1	0	0	1	298.8	293.84	2262.89	0	0	0	0	Psychotic disorder NAO	2	5	0	0
124	1	1	18	0	2	0	25	1	0	0	1	1	1	1	0	0	1	0	1	1	0	99	1	1	0	1	0	0	0	0	0	4	VMBO TL	6	0	0	0	296.52	0	2271.09	0	0	0	0	Bipolaire I disorder: Laatste episode manisch, Ernstig met psychotische kenmerken	3	4	0	0
125	2	1	16	0	2	2	62	0	0	1	1	1	0	1	0	0	1	0	1	1	0	2	1	1	0	1	0	0	1	0	0	1.5	basisschool	1	0	0	0	296.8	0	2271.09	0	0	0	0	Bipolaire I disorder: Laatste episode depressief, Niet-gespecificeerd	3	4	0	0
126	1	1	17	0	2	0	35	1	0	0	1	1	0	1	0	0	1	0	1	1	0	1	1	1	0	1	0	0	1	0	0	3	basisschool	1	0	0	0	298.9	314.9	2262.89	0	0	0	0	Psychotic disorder NAO	2	5	1	0
127	1	1	14	0	2	1	58	0	1	0	1	1	0	1	0	0	1	0	1	1	0	99	1	1	0	0	1	1	1	0	0	0	basisschool	1	0	0	0	299	0	301.6	0	0	0	0	PDD NOS	9	9	1	0
128	1	1	14	0	2	1	45	0	1	0	1	1	0	1	0	0	1	0	1	1	0	1	1	1	0	0	1	1	1	0	0	3	basisschool	1	0	0	0	298.9	0	2271.09	0	0	0	0	Psychotic disorder NAO	2	5	0	0
130	2	1	26	0	2	1	39	0	1	0	1	1	0	1	0	0	1	0	1	1	0	99	0	1	1	0	0	0	1	0	0	4	basisschool	1	0	0	0	296.36	0	301.9	301.6	0	0	0	Depressieve disorder: Recidiverend, Gedeeltelijk in remissie	3	3	0	0
131	1	1	24	0	2	0	26	1	0	0	1	1	0	1	0	0	1	0	1	1	0	2	0	1	1	0	0	0	0	0	0	5	VMBO TL	6	0	0	0	299.8	0	2271.09	0	0	0	0	PDD NOS	9	9	1	0
132	1	1	16	0	2	1	56	0	1	0	1	1	0	1	0	0	1	0	1	1	0	1	1	1	0	1	0	0	1	0	0	4	LTS	4	0	0	0	2262.81	0	301.9	0	0	0	0	Personality disorder nao	6	0	0	1
133	1	1	20	0	2	1	44	0	1	0	1	1	0	1	0	0	1	0	1	1	0	99	0	1	1	0	0	0	1	0	0	5	LTS	4	0	0	0	295.9	300.01	2271.09	0	0	0	0	schizophrenia: paranoidtype	2	6	0	0
134	2	1	23	0	2	1	51	0	1	0	1	1	0	1	0	0	1	0	1	1	0	99	0	1	1	0	0	0	0	0	0	6	HBO/WO Schoevers	11	0	0	0	295.7	0	2271.09	0	0	0	0	Schizoaffective disorder: Bipolar type	2	6	0	0
135	2	1	18	0	2	2	60	0	0	1	1	1	1	1	0	0	1	0	1	1	0	99	1	1	0	1	0	0	1	0	0	5	INAS	4	0	0	0	309.81	0	301.9	0	0	0	0	Personality disorder nao	6	0	0	0
136	2	1	24	0	2	1	50	0	1	0	1	1	1	1	0	0	1	0	1	1	0	2	0	1	1	0	0	0	0	0	0	7	WO theologie 5e jaar	11	0	0	0	296.33	300.4	301.9	0	0	0	0	Personality disorder nao	6	0	0	0
137	1	1	20	0	2	1	38	0	1	0	1	1	0	1	0	0	1	0	1	1	0	99	0	1	1	0	0	0	1	0	0	7	VBO schilder	4	1	0	0	2215.81	295.4	2262.89	0	0	0	0	Psychotic disorder NAO	2	5	0	1
138	1	1	21	0	2	1	55	0	1	0	1	1	0	1	0	0	1	0	1	1	0	99	0	1	1	0	0	0	0	0	0	6	HBO	10	0	0	0	0	0	0	0	0	0	0	none	0	0	0	1
139	2	1	20	0	2	2	60	0	0	1	1	1	0	1	0	0	1	0	1	1	0	99	0	1	1	0	0	0	1	1	0	3	Huishoudschool in joegoslavie	4	0	0	0	297.1	0	799.9	0	0	0	0	Waan disorder: Achtervolgingstype	2	6	0	0
140	1	1	19	0	2	0	33	1	0	0	1	1	0	1	0	0	1	0	1	1	0	1	1	1	0	1	0	0	1	0	0	3	basisschool	1	0	0	0	295.3	305.9	2271.09	0	0	0	0	schizophrenia: paranoidtype, Episodisch met restsymptomen tussen de episoden	2	6	0	0
141	2	1	25	0	2	1	55	0	1	0	1	1	0	1	0	0	1	0	1	1	0	99	0	1	1	0	0	0	0	0	0	4	mavo	6	0	0	0	295.3	304.8	2271.09	0	0	0	0	schizophrenia: paranoidtype	2	6	0	0
142	2	1	22	0	2	1	47	0	1	0	1	1	0	1	0	0	1	0	1	1	0	99	0	1	1	0	0	0	1	0	0	4	Mbo	4	1	0	0	296.34	298.9	2262.89	2262.89	0	0	0	Personality disorder nao	6	0	0	0
144	2	1	99	0	2	0	35	1	0	0	1	1	0	1	0	0	1	0	1	1	0	2	99	0	9	9	9	9	0	2	2		mavo	6	0	99	99	299	296.32	2262.89	0	0	0	0	Autistische disorder	9	9	1	0
146	1	1	99	0	2	1	55	0	1	0	1	1	0	1	0	0	1	0	1	1	0	1	99	0	9	9	9	9	0	2	2		vwo	9	0	99	99	299.8	0	799.9	0	0	0	0	Asperger	9	9	1	0
147	2	1	99	0	2	1	44	0	1	0	1	1	0	1	0	0	1	0	1	1	0	2	99	0	9	9	9	9	1	2	2		mbo	4	1	99	99	314.01	304.1	301.83	0	0	0	0	Borderline personality disorder	6	0	1	0
148	2	1	99	0	2	1	59	0	1	0	1	1	0	1	0	0	1	0	1	1	0	2	99	0	9	9	9	9	1	2	2		huishoudschool	4	0	99	99	309.81	298.9	301.9	0	0	0	0	PTDS chronic	4	11	0	0
151	1	1	99	0	2	1	51	0	1	0	1	1	0	1	0	0	1	0	1	1	0	1	99	0	9	9	9	9	9	2	2		onbekend	99	99	99	99	292.9	298.9	301.7	0	0	0	0	Antisociale persoonlijkheids disorder	6	5	0	0
152	2	1	22	0	2	1	51	0	1	0	1	1	0	1	0	0	1	0	1	1	0	99	0	1	1	0	0	0	0	0	0	3	MBO 3	7	0	0	0	296.89	0	2271.09	0	0	0	0	Bipolaire II disorder	3	4	0	0
154	2	1	99	0	2	1	54	0	1	0	1	1	0	1	0	0	1	0	1	1	0	3	99	0	9	9	9	9	9	2	2			99	99	99	99	309.81	300.4	301.83	0	0	0	0	Borderline personality disorder	6	0	0	0
157	2	1	99	0	2	1	43	0	1	0	1	1	0	1	0	0	1	0	1	1	0	99	99	0	9	9	9	9	9	2	2			99	99	99	99	300.3	0	301.83	0	0	0	0	Personality disorder nao	6	0	0	0
158	2	1	24	0	2	1	55	0	1	0	1	1	0	1	0	0	1	0	1	1	0	99	0	1	1	0	0	0	0	0	0	4	mavo	6	0	0	0	296.36	0	301.6	0	0	0	0	Depressieve disorder: Recidiverend, Volledig in remissie	3	3	0	0
159	1	1	99	0	2	2	61	0	0	1	1	1	0	1	0	0	1	0	1	1	0	2	99	0	9	9	9	9	9	1	1			99	99	99	99	298.9	309.81	2271.09	0	0	0	0	Psychotic disorder NAO	2	5	0	0
160	1	1	99	0	2	0	35	1	0	0	1	1	0	1	0	0	1	0	1	1	0	1	99	0	9	9	9	9	9	2	2			99	99	99	99	298.9	0	301	301.7	0	0	0	Psychotic disorder NAO	2	5	0	0
161	1	1	25	0	2	1	36	0	1	0	1	1	0	1	0	0	1	0	1	1	0	2	0	1	1	0	0	0	9	0	2		MBO	99	99	0	0	295.1	305.2	799.9	0	0	0	0	schizophrenia: Gedesorganiseerde type	2	6	0	0
162	1	1	99	1	2	1	46	0	1	0	1	1	0	1	0	0	1	0	1	1	0	99	99	0	9	9	9	9	9	2	2			99	99	99	99	309.81	304.1	799.9	0	0	0	0	Depressieve disorder NAO	3	3	0	0
163	2	1	99	0	2	1	58	0	1	0	1	1	0	1	0	0	1	0	1	1	0	2	99	0	9	9	9	9	9	2	2			99	99	99	99	295.7	303.9	2271.09	0	0	0	0	Schizoaffectieve disorder: Depressieve type	2	6	0	0
166	1	1	99	0	2	1	52	0	1	0	1	1	0	1	0	0	1	0	1	1	0	1	99	0	9	9	9	9	9	2	2			99	99	99	99	296.89	2261.1	301.82	0	0	0	0	Bipolaire II disorder	3	4	0	0
167	1	1	99	1	2	1	46	0	1	0	1	1	0	1	0	0	1	0	1	1	0	99	99	0	9	9	9	9	9	1	1			99	99	0	1	295.3	0	317	0	0	0	0	schizophrenia: paranoidtype, Episodisch met restsymptomen tussen de episoden	2	6	0	0
168	1	1	13	0	2	0	31	1	0	0	1	1	0	1	0	0	1	0	1	1	0	1	1	1	0	0	1	1	9	0	0	3	niet op formulier ingevuld	99	99	0	0	299.8	314.01	2271.09	0	0	0	0	PDD NOS	9	9	1	0
169	2	1	99	0	2	1	47	0	1	0	1	1	0	1	0	0	1	0	1	1	0	99	99	0	9	9	9	9	9	2	2			99	99	99	99	296.34	0	2271.09	0	0	0	0	Depressieve disorder: Recidiverend, Ernstig met psychotische kenmerken	3	3	0	0
171	2	1	99	0	2	2	60	0	0	1	1	1	0	1	0	0	1	0	1	1	0	2	99	0	9	9	9	9	9	2	2			99	99	99	99	295.9	294.9	2271.09	0	0	0	0	schizophrenia: paranoidtype	2	6	0	0
172	1	1	17	0	2	1	56	0	1	0	1	1	1	1	0	0	1	0	1	1	1	99	1	1	0	1	0	0	0	0	0	4	MTS	7	0	0	0	295.3	0	2271.09	0	0	0	0	schizophrenia: paranoidtype, Ander of niet gespecificeerd patroon	2	6	0	0
173	2	1	23	0	2	0	33	1	0	0	1	1	0	1	0	0	1	0	1	1	0	99	0	1	1	0	0	0	0	0	0		MEAO	7	0	0	0	298.9	0	2271.09	0	0	0	0	Psychotic disorder NAO	2	5	0	0
174	2	1	27	0	2	1	41	0	1	0	1	1	0	1	0	0	1	0	1	1	0	99	0	1	1	0	0	0	1	0	0		mavo/MBO met 5 certificaten	5	1	0	0	296.44	0	799.9	0	0	0	0	Bipolaire I disorder: Laatste episode manisch, Ernstig met psychotische kenmerken	3	4	0	0
175	2	1	21	0	2	0	26	1	0	0	1	1	0	1	0	0	1	0	1	1	0	99	0	1	1	0	0	0	0	0	0	5	havo, is bezig met HBO	8	0	0	0	298.9	0	2271.09	0	0	0	0	Psychotic disorder NAO	2	5	0	0
176	2	1	99	0	2	1	37	0	1	0	1	1	0	1	0	0	1	0	1	1	0	1	99	0	9	9	9	9	0	0	0	5	HBO	10	0	0	0	295.3	0	301.6	0	0	0	0	schizophrenia: paranoidtype, Episodisch met restsymptomen tussen de episoden	2	6	0	0
177	1	1	26	0	2	1	50	0	1	0	1	1	0	1	0	0	1	0	1	1	0	99	0	1	1	0	0	0	1	0	0		mbo	4	1	0	0	302.2	302.84	2271.09	0	0	0	0	Psychotic disorder NAO	2	5	0	0
178	2	1	99	0	2	1	45	0	1	0	1	1	0	1	0	0	1	0	1	1	0	2	99	0	9	9	9	9	9	2	2			99	99	99	99	295.7	0	301.9	0	0	0	0	Schizoaffectieve disorder: Depressieve type	2	6	0	0
180	1	1	99	1	2	0	29	1	0	0	1	1	0	1	0	0	1	0	1	1	0	1	99	0	9	9	9	9	9	2	2			99	99	99	99	295.3	305.2	317	0	0	0	0	schizophrenia: paranoidtype	2	6	0	0
182	2	1	99	0	2	0	34	1	0	0	1	1	0	1	0	0	1	0	1	1	0	2	99	0	9	9	9	9	9	2	2			99	99	99	99	296.36	0	301.9	0	0	0	0	Personality disorder nao	6	0	0	0
183	2	1	99	0	2	2	63	0	0	1	1	1	0	1	0	0	1	0	1	1	0	3	99	0	9	9	9	9	9	2	2			99	99	99	99	309.81	300.4	301.9	0	0	0	0	PTDS chronic	4	11	0	0
184	1	1	99	0	2	1	43	0	1	0	1	1	0	1	0	0	1	0	1	1	0	99	99	0	9	9	9	9	9	2	2			99	99	99	99	300.02	0	301.9	0	0	0	0	Paniek disorder met agorafobie	4	2	0	0
185	1	1	99	0	2	1	51	0	1	0	1	1	0	1	0	0	1	0	1	1	0	99	99	0	9	9	9	9	9	2	2			99	99	99	99	295.3	0	317	0	0	0	0	schizophrenia: paranoidtype	2	6	0	0
186	1	1	99	0	2	1	54	0	1	0	1	1	0	1	0	0	1	0	1	1	0	99	99	0	9	9	9	9	9	2	2			99	99	99	99	295.9	304.3	2271.09	0	0	0	0	schizophrenia: Gedesorganiseerde type, Episodisch met restsymptomen tussen de episoden	2	6	0	0
187	1	1	99	0	2	1	59	0	1	0	1	1	0	1	0	0	1	0	1	1	0	99	99	0	9	9	9	9	9	2	2			99	99	99	99	304.3	295.9	2271.09	0	0	0	0	schizophrenia: Gedesorganiseerde type	2	6	0	0
188	1	1	99	0	2	0	29	1	0	0	1	1	1	1	0	0	1	0	1	1	0	1	99	0	9	9	9	9	9	2	2			99	99	99	99	295.3	0	799.9	0	0	0	0	schizophrenia: paranoidtype	2	6	0	0
190	2	1	99	0	2	1	51	0	1	0	1	1	0	1	0	0	1	0	1	1	0	2	99	0	9	9	9	9	9	2	2			99	99	99	99	304.1	309.81	301.83	0	0	0	0	Borderline personality disorder	6	0	0	0
191	1	1	99	1	2	1	38	0	1	0	1	1	0	1	0	0	1	0	1	1	0	2	99	0	9	9	9	9	9	2	2			99	99	99	99	298.9	305.9	799.9	0	0	0	0	Psychotic disorder NAO	2	5	0	0
192	1	1	99	0	2	1	49	0	1	0	1	1	0	1	0	0	1	0	1	1	0	99	99	0	9	9	9	9	9	2	2			99	99	99	99	314.01	300.4	301.4	301.83	0	0	0	Aandachtstekort disorder met hyperactiviteit: Gecombineerde type	9	9	1	0
193	2	1	99	0	2	0	35	1	0	0	1	1	0	1	0	0	1	0	1	1	0	99	99	0	9	9	9	9	9	2	2			99	99	99	99	309.81	0	301.83	0	0	0	0	PTDS chronic	4	11	0	0
194	2	1	99	0	2	1	36	0	1	0	1	1	0	1	0	0	1	0	1	1	0	1	99	0	9	9	9	9	9	2	2			99	99	99	99	296.89	314	301.9	0	0	0	0	Bipolaire II disorder	3	4	1	0
196	1	1	99	0	2	1	39	0	1	0	1	1	0	1	0	0	1	0	1	1	0	1	99	0	9	9	9	9	9	2	2			99	99	99	99	295.9	304.8	301.7	0	0	0	0	schizophrenia: Ongedifferentieerde type	2	6	0	0
199	1	1	99	0	2	1	55	0	1	0	1	1	0	1	0	0	1	0	1	1	0	99	99	0	9	9	9	9	9	2	2			99	99	99	99	299.8	305.9	301.9	0	0	0	0	Asperger	9	9	1	0
201	1	1	25	1	2	1	37	0	1	0	1	1	0	1	0	0	1	0	1	1	0	2	0	1	1	0	0	0	0	0	0	6	havo	8	0	0	0	300.23	0	301.22	0	0	0	0	Schizotypic personality disorder	2	6	0	0
202	1	1	99	0	2	0	34	1	0	0	1	1	0	1	0	0	1	0	1	1	0	2	99	0	9	9	9	9	9	2	2			99	99	99	99	299.8	300.23	2271.09	0	0	0	0	Pervasieve ontwikkelings disorder NAO	9	9	1	0
203	1	1	99	0	2	1	56	0	1	0	1	1	0	1	0	0	1	0	1	1	0	99	99	0	9	9	9	9	9	2	2			99	99	99	99	2271.09	0	301.22	0	0	0	0	Schizotypic personality disorder	2	6	0	1
205	2	1	99	0	2	1	39	0	1	0	1	1	0	1	0	0	1	0	1	1	0	2	99	0	9	9	9	9	9	2	2			99	99	99	99	309.81	298.9	2271.09	0	0	0	0	Posttraumatic stress- disorder: Met verlaat begin	4	11	0	0
206	2	1	99	0	2	1	53	0	1	0	1	1	0	1	0	0	1	0	1	1	0	99	99	0	9	9	9	9	9	2	2			99	99	99	99	296.26	2261.1	301.9	0	0	0	0	Personality disorder nao	6	0	0	0
207	2	1	99	0	2	1	41	0	1	0	1	1	0	1	0	0	1	0	1	1	0	99	99	0	9	9	9	9	9	2	2			99	99	99	99	295.7	0	301.83	0	0	0	0	Schizoaffective disorder: Bipolar type	2	6	0	0
208	2	1	99	0	2	1	37	0	1	0	1	1	2	1	0	0	1	0	1	0	2	1	99	0	9	9	9	9	9	2	2			99	99	99	99	300.14	300.3	301.82	301.83	0	0	0	Dissociatieve identiteits disorder	0	1	0	0
209	2	1	99	0	2	1	49	0	1	0	1	1	2	1	0	0	1	0	1	0	2	99	99	0	9	9	9	9	9	2	2			99	99	99	99	300	299.8	2271.09	0	0	0	0	Asperger	9	9	1	0
210	2	1	99	0	2	0	28	1	0	0	1	1	0	1	0	0	1	0	1	1	0	99	99	0	9	9	9	9	9	2	2			99	99	99	99	299.8	313.82	2271.09	0	0	0	0	PDD NOS	9	9	1	0
212	2	1	21	0	2	1	52	0	1	0	1	1	0	1	0	0	1	0	1	1	0	3	0	1	1	0	0	0	0	0	0	4	mavo	6	0	0	0	298.9	309.81	2271.09	0	0	0	0	PTDS chronic	4	11	0	0
214	1	1	99	0	2	1	52	0	1	0	1	1	0	1	0	0	1	0	1	1	0	99	99	0	9	9	9	9	9	2	2			99	99	99	99	296.32	299.8	301.6	301.82	0	0	0	Asperger	9	9	1	0
215	1	1	99	0	2	0	28	1	0	0	1	1	2	1	0	0	1	0	1	0	2	1	99	0	9	9	9	9	9	2	2			99	99	99	99	295.9	0	2271.09	0	0	0	0	schizophrenia: paranoidtype, Episodisch met restsymptomen tussen de episoden	2	6	0	0
216	1	1	99	0	2	1	49	0	1	0	1	1	0	1	0	0	1	0	1	1	0	99	99	0	9	9	9	9	9	2	2			99	99	99	99	295.4	0	2271.09	0	0	0	0	schizophrenia: paranoidtype, Ononderbroken	2	6	0	0
217	2	1	99	0	2	1	58	0	1	0	1	1	0	1	0	0	1	0	1	1	0	1	99	0	9	9	9	9	9	2	2			99	99	99	99	295.3	0	318	0	0	0	0	schizophrenia: paranoidtype	2	6	0	0
219	2	1	17	0	2	1	48	0	1	0	1	1	0	1	0	0	1	0	1	1	0	2	1	1	0	1	0	0	0	0	0	4	mavo	6	0	0	0	295.9	0	2271.09	0	0	0	0	schizophrenia: Ongedifferentieerde type	2	6	0	0
220	2	1	21	0	2	1	42	0	1	0	1	1	0	1	0	0	1	0	1	1	0	99	0	1	1	0	0	0	1	0	0	3	leao	4	0	0	0	304.3	305	301.83	0	0	0	0	Borderline personality disorder	6	0	0	0
221	1	1	99	0	2	1	52	0	1	0	1	1	0	1	0	0	1	0	1	1	0	99	99	0	9	9	9	9	9	2	2			99	99	99	99	309.81	296.31	301.6	0	0	0	0	Afhankelijke persoonlijkheids disorder	6	11	0	0
222	2	1	99	0	2	1	54	0	1	0	1	1	0	1	0	0	1	0	1	1	0	99	99	0	9	9	9	9	9	2	2			99	99	99	99	309.81	2261.2	301.9	0	0	0	0	PTDS chronic	4	11	0	0
223	2	1	99	0	2	1	41	0	1	0	1	1	0	1	0	0	1	0	1	1	0	3	99	0	9	9	9	9	9	2	2			99	99	99	99	2271.09	0	301.9	301.6	0	0	0	Personality disorder nao	6	0	0	1
224	2	1	99	1	2	0	32	1	0	0	1	1	0	1	0	0	1	0	1	1	0	1	99	0	9	9	9	9	9	2	2			99	99	99	99	298.9	0	317	0	0	0	0	Psychotic disorder NAO	2	5	0	0
225	1	1	22	0	2	1	54	0	1	0	1	1	1	1	0	0	1	0	1	1	0	2	0	1	1	0	0	0	1	0	0	3	MBO	4	1	0	0	295.6	0	799.9	0	0	0	0	schizophrenia: Resttype	2	6	0	0
226	2	1	99	1	2	0	32	1	0	0	1	1	0	1	0	0	1	0	1	1	0	99	99	0	9	9	9	9	9	2	2			99	99	99	99	298.9	0	2271.09	0	0	0	0	Psychotic disorder NAO	2	5	0	0
227	1	1	99	0	2	0	35	1	0	0	1	1	0	1	0	0	1	0	1	1	0	99	99	0	9	9	9	9	9	2	2			99	99	99	99	309.81	309.81	301.83	0	0	0	0	Borderline persoonlijkheidsstoorn.	6	11	0	0
229	2	1	99	0	2	2	63	0	0	1	1	1	2	1	0	0	1	0	1	0	2	3	99	0	9	9	9	9	9	2	2			99	99	99	99	295.3	303.9	301.6	0	0	0	0	schizophrenia: paranoidtype	2	6	0	0
231	2	1	99	0	2	1	37	0	1	0	1	1	0	1	0	0	1	0	1	1	0	99	99	0	9	9	9	9	9	2	2			99	99	99	99	295.1	309.81	2262.89	0	0	0	0	schizophrenia: Gedesorganiseerde type	2	6	0	0
234	2	1	99	0	2	1	55	0	1	0	1	1	0	1	0	0	1	0	1	1	0	99	99	0	9	9	9	9	9	2	2			99	99	99	99	297.1	0	301.9	0	0	0	0	Waan disorder: Niet gespecificeerd type	2	6	0	0
236	2	1	99	0	2	2	61	0	0	1	1	1	2	1	0	0	1	0	1	0	2	99	99	0	9	9	9	9	9	2	2			99	99	99	99	298.9	293.89	2271.09	0	0	0	0	schizophrenia: paranoidtype	2	6	0	0
237	2	1	99	0	2	2	71	0	0	1	1	1	0	1	0	0	1	0	1	1	0	99	99	0	9	9	9	9	9	2	2			99	99	99	99	295.9	0	2271.09	0	0	0	0	schizophrenia: Ongedifferentieerde type, Ononderbroken	2	6	0	0
238	2	1	99	0	2	1	40	0	1	0	1	1	0	1	0	0	1	0	1	1	0	6	99	0	9	9	9	9	9	2	2			99	99	99	99	2271.09	0	301.83	2262.89	0	0	0	Borderline personality disorder	6	0	0	1
239	1	1	99	0	2	1	52	0	1	0	1	1	0	1	0	0	1	0	1	1	0	2	99	0	9	9	9	9	9	2	2			99	99	99	99	300.3	0	799.9	0	0	0	0	Obsessieve-compulsieve disorder	4	2	0	0
240	1	1	99	0	2	1	53	0	1	0	1	1	0	1	0	0	1	0	1	1	0	99	99	0	9	9	9	9	9	2	2			99	99	99	99	300.3	296.36	2271.09	0	0	0	0	Depressieve disorder: Recidiverend, Volledig in remissie	3	3	0	0
241	2	1	99	0	2	1	54	0	1	0	1	1	2	1	0	0	1	0	1	0	2	1	99	0	9	9	9	9	9	2	2			99	99	99	99	300.4	309.81	301.83	0	0	0	0	Borderline personality disorder	6	0	0	0
242	2	1	99	0	2	1	43	0	1	0	1	1	0	1	0	0	1	0	1	1	0	1	99	0	9	9	9	9	9	2	2			99	99	99	99	295.9	302.6	2271.09	0	0	0	0	schizophrenia: paranoidtype, Eenmalige episode volledig in remissie	2	6	0	0
243	1	1	99	0	2	1	41	0	1	0	1	1	0	1	0	0	1	0	1	1	0	99	99	0	9	9	9	9	9	2	2			99	99	99	99	296.8	0	2271.09	0	0	0	0	Bipolaire I disorder: Laatste episode niet-gespecificeerd	3	4	0	0
244	2	1	99	0	2	1	53	0	1	0	1	1	0	1	0	0	1	0	1	1	0	99	99	0	9	9	9	9	9	2	2			99	99	99	99	295.3	2261.2	799.9	0	0	0	0	schizophrenia: paranoidtype	2	6	0	0
245	1	1	26	0	2	0	27	1	0	0	1	1	2	1	0	0	1	0	1	1	0	1	0	1	1	0	0	0	0	0	0	6	vwo	9	0	0	0	295.9	0	2271.09	0	0	0	0	schizophrenia: paranoidtype	2	6	0	0
246	2	1	21	0	2	1	37	0	1	0	1	1	1	1	0	0	1	0	1	1	0	1	0	1	1	0	0	0	1	0	0	4	mbo	4	1	0	0	314.01	300.81	2271.09	0	0	0	0	ADHD	9	9	1	0
247	1	1	18	0	2	1	47	0	1	0	1	1	1	1	0	0	1	0	1	1	0	99	1	1	0	1	0	0	1	0	0	1.5	lagere school	1	0	0	0	296.44	303.9	301.9	0	0	0	0	Bipol.I st. mst rct.epi.hypomaan	3	4	0	0
248	2	1	23	1	2	1	40	0	1	0	1	1	2	1	0	0	1	0	1	1	0	2	0	1	1	0	0	0	1	0	0	3	mbo	4	1	0	0	296.32	309.81	301.9	0	0	0	0	Posttraumatic stress- disorder	4	11	0	0
249	1	1	15	0	2	0	34	1	0	0	1	1	1	1	0	0	1	0	1	1	0	99	1	1	0	0	1	1	1	0	1	2	mbo	4	1	0	0	295.3				0	0	0	schizophrenia, paranoidtype	2	6	0	0
250	1	1	23	1	2	0	33	1	0	0	1	1	2	1	0	0	1	0	1	1	0	99	0	1	1	0	0	0	1	0	0	4	vbo-c, mbo	4	1	0	0	295.3	0	2271.09	0	0	0	0	schizophrenia, paranoidtype	2	6	0	0
251	2	1	20	0	2	1	57	0	1	0	1	1	2	1	0	0	1	0	1	1	0	99	0	1	1	0	0	0	0	0	0	4	mavo	6	0	0	0	296.66	303.9	2271.09	0	0	0	0	Bipol.I st. mst rct.epi.gem.vol.rem	3	4	0	0
252	2	1	15	0	2	1	58	0	1	0	1	1	2	1	0	0	1	0	1	1	0	99	1	1	0	0	1	1	1	0	0	6	basisschool	1	0	0	0	309.81	314.9	301.83	0	0	0	0	Depress. st. recidiv.vol.remissie	3	3	1	0
253	2	1	17	0	2	1	40	0	1	0	1	1	2	1	0	0	1	0	1	1	0	2	1	1	0	1	0	0	1	0	0	0	basisschool	1	0	0	0	309.81	2261.1	301.83	317	0	0	0	Posttraumatic stress- disorder	4	11	0	0
254	1	1	25	0	2	0	32	1	0	0	1	1	2	1	0	0	1	0	1	1	0	2	0	1	1	0	0	0	0	0	0	5	havo	8	0	0	0	299.8	0	2271.09	0	0	0	0	schizophrenia, paranoidtype	2	6	1	0
255	1	1	22	0	2	1	38	0	1	0	1	1	2	1	0	0	1	0	1	1	0	1	0	1	1	0	0	0	1	0	0	4	mbo	4	1	0	0	295.3	0	2271.09	0	0	0	0	schizophrenia, paranoidtype	2	6	0	0
256	2	1	20	0	2	1	57	0	1	0	1	1	2	1	0	0	1	0	1	1	0	4	0	1	1	0	0	0	1	0	0	6	mbo	4	1	0	0	295.7	300	301.4	301.6	0	0	0	Schizoaffectieve disorder	2	6	0	0
257	2	1	99	1	2	1	53	0	1	0	1	1	2	1	0	0	1	0	1	1	0	3	99	0	9	9	9	9	0	0	1	0	universiteit in frankrijk	11	0	0	0	309.81	309.81	2271.09	0	0	0	0	Bipolaire II disorder	3	4	0	0
258	1	1	21	0	2	2	62	0	0	1	1	1	0	1	0	0	1	0	1	1	0	2	0	1	1	0	0	0	1	0	0	4	lts	4	0	0	0	296.43	0	799.9	0	0	0	0	Bipol.I st. mst rct.epi.man.ern.m.p	3	4	0	0
261	2	1	10	0	2	1	39	0	1	0	1	1	0	1	0	0	1	0	1	1	0	2	1	1	0	0	1	1	1	0	1		lagere school	1	0	0	0	300.3	2261.2	2262.89	0	0	0	0	Obsessieve-compulsieve disorder	4	2	0	0
262	1	1	22	0	2	1	59	0	1	0	1	1	0	1	0	0	1	0	1	1	0	99	0	1	1	0	0	0	1	0	0		CTS(technische school)	4	0	0	0	295.3	2262.81	799.9	0	0	0	0	schizophrenia: paranoidtype	2	6	0	0
264	2	1	25	0	2	1	44	0	1	0	1	1	0	1	0	0	1	0	1	1	0	99	0	1	1	0	0	0	0	0	0		hbo	10	0	0	0	298.9	0	2271.09	0	0	0	0	Psychotic disorder NAO	2	5	0	0
265	1	1	19	0	2	1	57	0	1	0	1	1	2	1	0	0	1	0	1	1	0	99	1	1	0	1	0	0	0	0	0		hbo	10	0	0	0	298.9	296.56	799.9	0	0	0	0	Bipolaire I disorder: Laatste episode manisch, Volledig in remissie	3	4	0	0
266	2	1	8	0	2	1	50	0	1	0	1	1	2	1	0	0	1	0	1	1	0	99	1	1	0	0	1	1	1	0	0		huishoudschool	4	0	0	0	295.7	0	317	0	0	0	0	Schizoaffectieve disorder: Depressieve type	2	6	0	0
267	2	1	23	0	2	2	61	0	0	1	1	1	0	1	0	0	1	0	1	1	0	99	0	1	1	0	0	0	1	0	0		kappersopleiding	4	1	0	0	309.81	2261.2	301.6	2262.89	0	0	0	Afhankelijke persoonlijkheids disorder	6	11	0	0
268	1	1	13	0	2	1	59	0	1	0	1	1	1	1	0	0	1	0	1	1	0	3	1	1	0	0	1	1	1	0	0		kv/jv	4	0	0	0	296.4	0	301.6	0	0	0	0	Bipolaire I disorder: Laatste episode depressief, Niet-gespecificeerd	3	4	0	0
269	1	1	14	0	2	0	20	1	0	0	1	1	0	1	0	0	1	0	1	1	0	99	1	1	0	0	1	1	1	0	1		lagere school	1	0	0	0	295.3	299.8	318	0	0	0	0	Psychotic disorder NAO	2	5	1	0
270	1	1	18	0	2	0	22	1	0	0	1	1	0	1	0	0	1	0	1	1	0	99	1	1	0	1	0	0	1	0	1		basisschool	1	0	0	0								PDD NOS	9	9	1	1
271	2	1	18	0	2	1	49	0	1	0	1	1	0	1	0	0	1	0	1	1	0	2	1	1	0	1	0	0	0	0	0		mavo 4	6	0	0	0	300.4	304.3	301.83		0	0	0	Borderline personality disorder	6	0	0	0
272	1	1	21	0	2	1	45	0	1	0	1	1	0	1	0	0	1	0	1	1	0	99	0	1	1	0	0	0	0	0	0		hbo	10	0	0	0	295.9	0	2271.09	0	0	0	0	Schizoaffective disorder: Bipolar type	2	6	0	0
273	1	1	17	0	2	0	29	1	0	0	1	1	0	1	0	0	1	0	1	1	0	99	1	1	0	1	0	0	1	0	0		mbo	4	1	0	0								Personality disorder nao	6	0	0	1
274	2	1	24	0	2	1	56	0	1	0	1	1	0	1	0	0	1	0	1	1	0	99	0	1	1	0	0	0	0	0	0		mavo	6	0	0	0	296.44	0	799.9	0	0	0	0	Bipolaire disorder NAO	3	4	0	0
275	2	1	22	0	2	1	52	0	1	0	1	1	0	1	0	0	1	0	1	1	0	2	0	1	1	0	0	0	0	0	0		mavo 4	6	0	0	0	296.43	309.81	799.9	0	0	0	0	Bipolaire I disorder: Laatste episode manisch, Ernstig met psychotische kenmerken	3	4	0	0
277	2	1	19	0	2	1	44	0	1	0	1	1	2	1	0	0	1	0	1	1	0	4	1	1	0	1	0	0	1	0	0	9	MBO	4	1	0	0	312.9	0	2262.89	317	0	0	0	Depressieve disorder: Recidive Medium	3	3	1	0
278	2	1	23	0	2	0	30	1	0	0	1	1	0	1	0	0	1	0	1	1	0	99	0	1	1	0	0	0	0	0	0		mavo	6	0	0	0	2261.2	305.2	301.9	0	0	0	0	Personality disorder nao	6	0	0	1
279	1	1	26	0	2	0	28	1	0	0	1	1	0	1	0	0	1	0	1	1	0	99	0	1	1	0	0	0	0	2	0		havo	8	0	0	0	298.9	0	799.9	0	0	0	0	Psychotic disorder NAO	2	5	0	0
280	1	1	23	0	2	1	53	0	1	0	1	1	0	1	0	0	1	0	1	1	0	1	0	1	1	0	0	0	1	0	0		mbo	4	1	0	0	299.8	0	2271.09	0	0	0	0	Asperger	9	9	1	0
281	2	1	15	0	2	1	52	0	1	0	1	1	0	1	0	0	1	0	1	1	0	99	1	1	0	0	1	1	1	0	0		leao	4	0	0	0	295.7	0	2271.09	0	0	0	0	Schizoaffective disorder: Bipolar type	2	6	0	0
282	2	1	18	0	2	2	61	0	0	1	1	1	0	1	0	0	1	0	1	1	0	99	1	1	0	1	0	0	1	0	0		mbo	4	1	0	0	309.81	0	301.2	0	0	0	0	Schizoide persoonlijkheid disorder	2	6	0	0
283	2	1	21	0	2	0	26	1	0	0	1	1	0	1	0	0	1	0	1	1	0	99	0	1	1	0	0	0	1	0	0		mbo 2	4	0	0	0	304.8	309.81	2271.09	0	0	0	0	PTDS chronic	4	11	0	0
284	2	1	25	0	2	1	53	0	1	0	1	1	0	1	0	0	1	0	1	1	0	99	0	1	1	0	0	0	0	0	0		mavo	6	0	0	0	295.3	300.82	799.9	0	0	0	0	schizophrenia, paranoidtype	2	6	0	0
285	1	1	11	0	2	1	49	0	1	0	1	1	0	1	0	0	1	0	1	1	0	99	1	1	0	0	1	1	1	0	0		praktijkschool	4	0	0	0								PTDS chronic	4	11	0	1
286	2	1	27	0	2	1	48	0	1	0	1	1	1	1	0	0	1	0	1	1	0	99	0	1	1	0	0	0	1	2	0		mbo	4	1	0	0	300.02	296.36	301.6	301.82	0	0	0	Persoonlijkheids disorder nao	6	0	0	0
287	2	1	18	0	2	1	55	0	1	0	1	1	0	1	0	0	1	0	1	1	0	99	1	1	0	1	0	0	1	0	0		telefoniste/receptioniste	4	1	0	0	300.4	307.5	301.6	0	0	0	0	Dysthyme disorder	3	3	0	0
288	1	1	16	1	2	1	46	0	1	0	1	1	0	1	0	0	1	0	1	1	0	99	1	1	0	1	0	0	1	2	0		mbo	4	1	0	0	298.8	0	2271.09	0	0	0	0	Kortdurende psychotische disorder	2	5	0	0
289	2	1	24	0	2	1	52	0	1	0	1	1	0	1	0	0	1	0	1	1	0	1	0	1	1	0	0	0	0	0	0		mavo	6	0	0	0	300.3	0	301.6	0	0	0	0	Obsessieve-compulsieve disorder	4	2	0	0
290	2	1	18	0	2	0	30	1	0	0	1	1	0	1	0	0	1	0	1	1	0	1	1	1	0	1	0	0	1	2	0		mbo	4	1	0	0	309.81	312.3	301.83	317	0	0	0	PTDS chronic	4	11	0	0
291	2	1	27	0	2	1	41	0	1	0	1	1	0	1	0	0	1	0	1	1	0	1	0	1	1	0	0	0	0	0	0		hbo	10	0	0	0	296.32	307.5	301.4	301.81	0	0	0	Obsessieve-compulsieve persoonlijkheids disorder	6	0	0	0
292	2	1	11	0	2	1	44	0	1	0	1	1	0	1	0	0	1	0	1	1	0	1	1	1	0	0	1	1	1	0	0		huishoudschool	4	0	0	0	295.9	0	2271.09	0	0	0	0	schizophrenia: Ongedifferentieerde type, Ander of niet gespecificeerd patroon	2	6	0	0
293	2	1	99	1	2	1	42	0	1	0	1	1	0	1	0	0	1	0	1	1	0	1	99	0	9	9	9	9	1	1	1		basisschool	1	0	99	99	298.9	0	799.9	0	0	0	0	Psychotic disorder NAO	2	5	0	0
294	1	1	20	0	2	1	41	0	1	0	1	1	0	1	0	0	1	0	1	1	0	99	0	1	1	0	0	0	1	0	0		mbo	4	1	0	0	314	304.8	2271.09	0	0	0	0	Aandachtstekort disorder met hyperactiviteit: Overwegend onoplettendheid type	9	9	1	0
295	2	1	99	1	2	1	50	0	1	0	1	1	0	1	0	0	1	0	1	1	0	99	99	0	9	9	9	9	9	2	2		onbekend spreekt geen nl	99	99	99	99	300.4	309.81	301.83	301.9	0	0	0	PTDS chronic	4	11	0	0
296	2	1	99	1	2	1	38	0	1	0	1	1	0	1	0	0	1	0	1	1	0	99	99	0	9	9	9	9	9	1	1		middelbare school in colombia	99	99	1	1	309.81	300.4	2271.09	0	0	0	0	PTDS chronic	4	11	0	0
297	1	1	26	0	2	0	35	1	0	0	1	1	0	1	0	0	1	0	1	1	0	4	0	1	1	0	0	0	0	0	0		hbo/havo	10	0	0	0	295.1	0	2271.09	0	0	0	0	schizophrenia: Gedesorganiseerde type	2	6	0	0
298	2	1	20	0	2	1	58	0	1	0	1	1	0	1	0	0	1	0	1	1	0	99	0	1	1	0	0	0	1	0	0		kappersopleiding	4	1	0	0	2271.09	305.4	301.83	301.5	0	0	0	Borderline personality disorder	6	0	0	1
299	2	1	19	0	2	2	63	0	0	1	1	1	0	1	0	0	1	0	1	1	0	99	1	1	0	1	0	0	1	0	0		mbo	4	1	0	0	300.23	304.1	301.6	0	0	0	0	Sociale fobie: Gegeneraliseerd	4	2	0	0
300	2	1	25	0	2	1	49	0	1	0	1	1	0	1	0	0	1	0	1	1	0	3	0	1	1	0	0	0	1	0	0		leao	4	0	0	0	2271.09	0	301.83	0	0	0	0	Borderline personality disorder	6	0	0	1
301	2	1	10	0	2	1	58	0	1	0	1	1	0	1	0	0	1	0	1	1	0	2	1	1	0	0	1	1	9	1	1		lyceum gezeten school in italie gehad	99	99	0	0	295.3	0	2271.09	0	0	0	0	Schizoaffective disorder: Bipolar type	2	6	0	0
303	2	1	9	1	2	1	51	0	1	0	1	1	0	1	0	0	1	0	1	1	0	99	1	1	0	0	1	1	1	0	0		basisschool	1	0	0	0	300.4	300.81	301.6	301.82	0	0	0	Afhankelijke persoonlijkheids disorder	6	3	0	0
304	1	1	24	0	2	0	29	1	0	0	1	1	0	1	0	0	1	0	1	1	0	99	0	1	1	0	0	0	0	0	0		mbo 3	7	0	0	0	295.3	0	799.9	0	0	0	0	schizophrenia: paranoidtype, Episodisch zonder restsymptomen tussen de episoden	2	6	0	0
305	2	1	24	0	2	1	50	0	1	0	1	1	0	1	0	0	1	0	1	1	0	99	0	1	1	0	0	0	1	0	0		lhno	4	0	0	0	300.4	303.9	301.82	0	0	0	0	avoidant personality disorder	6	0	0	0
307	2	1	26	0	2	1	53	0	1	0	1	1	2	1	0	0	1	0	1	1	0	2	0	1	1	0	0	0	1	0	1	3	leaO	4	0	0	0	309.81	296.31	301.6	0	0	0	0	PTDS chronic	4	11	0	0
309	2	1	23	0	2	1	56	0	1	0	1	1	0	1	0	0	1	0	1	1	0	99	0	1	1	0	0	0	0	0	0		mavo	6	0	0	0	298.9	300.3	2271.09	0	0	0	0	Psychotic disorder NAO	2	5	0	0
310	1	1	12	0	2	1	39	0	1	0	1	1	0	1	0	0	1	0	1	1	0	99	1	1	0	0	1	1	1	0	0		koksschool	4	1	0	0	297.1	0	2271.09	0	0	0	0	Waan disorder: Niet gespecificeerd type	2	6	0	0
312	2	1	99	0	2	0	32	1	0	0	1	1	0	1	0	0	1	0	1	1	0	99	99	0	9	9	9	9	9	0	0		geen scil	99	99	0	0	309.81	311	301.9	0	0	0	0	PTDS chronic	4	11	0	0
313	2	1	99	1	2	2	61	0	0	1	1	1	0	1	0	0	1	0	1	1	0	99	99	0	9	9	9	9	9	1	1		geen scil	99	99	99	99	309.81	300.4	2271.09	0	0	0	0	Psychotic disorder NAO	2	5	0	0
314	1	1	22	0	2	1	56	0	1	0	1	1	0	1	0	0	1	0	1	1	0	99	0	1	1	0	0	0	0	0	0		hts	10	0	0	0	309.81	312.3	301.9	0	0	0	0	Personality disorder nao	6	0	0	0
315	2	1	22	0	2	1	39	0	1	0	1	1	0	1	0	0	1	0	1	1	0	3	0	1	1	0	0	0	1	0	0		mbo	4	1	0	0	300.4	2261.1	301.6	301.9	0	0	0	Afhankelijke persoonlijkheids disorder	6	3	0	0
316	2	1	22	0	2	1	48	0	1	0	1	1	0	1	0	0	1	0	1	1	0	99	0	1	1	0	0	0	1	0	0		lhno	4	0	0	0	304.1	304.1	301.4	301.6	0	0	0	Afhankelijke persoonlijkheids disorder	6	8	0	0
318	1	1	24	0	2	1	36	0	1	0	1	1	2	1	0	0	1	0	1	1	0	1	0	1	1	0	0	0	0	0	0	5	mavo	6	0	0	0	300.23	300.4	301.82	0	0	0	0	avoidant personality disorder	6	0	0	0
319	1	1	11	1	2	1	54	0	1	0	1	1	0	1	0	0	1	0	1	1	0	99	1	1	0	0	1	1	0	2	2		electrotechniek	10	0	0	0	295.3	303.9	2271.09	0	0	0	0	schizophrenia: paranoidtype	2	6	0	0
320	2	1	24	0	2	1	44	0	1	0	1	1	0	1	0	0	1	0	1	1	0	1	0	1	1	0	0	0	1	0	0		mbo	4	1	0	0	309.81	0	301.6	301.82	0	0	0	PTDS chronic	4	11	0	0
321	2	1	18	0	2	2	61	0	0	1	1	1	0	1	0	0	1	0	1	1	0	2	1	1	0	1	0	0	9	1	1		middelbare school	99	99	0	1	309.81	0	301.82	0	0	0	0	PTDS chronic	4	11	0	0
322	2	1	15	0	2	2	62	0	0	1	1	1	0	1	0	0	1	0	1	1	0	99	1	1	0	0	1	1	1	1	1		geen	0	0	99	99	309.81	0	301.82	301.6	0	0	0	PTDS chronic	4	11	0	0
323	2	1	16	1	2	1	53	0	1	0	1	1	0	1	0	0	1	0	1	1	0	99	1	1	0	1	0	0	1	2	2		huishoudschool	4	0	99	99	309.81	298.9	301.83	0	0	0	0	Psychotic disorder NAO	2	5	0	0
324	2	1	20	0	2	1	57	0	1	0	1	1	0	1	0	0	1	0	1	1	0	3	0	1	1	0	0	0	1	2	2		lhno	4	0	0	0	309.81	2261.2	301.81	301.83	0	0	0	Posttraumatic stress- disorder	4	11	0	0
325	2	1	26	0	2	1	52	0	1	0	1	1	0	1	0	0	1	0	1	1	0	99	0	1	1	0	0	0	0	0	5		universiteit	11	0	0	0	295.7	2262.2	301.4	0	0	0	0	Schizoaffectieve disorder: Depressieve type	2	6	0	0
326	2	1	22	0	2	1	48	0	1	0	1	1	0	1	0	0	1	0	1	1	0	99	0	1	1	0	0	0	0	0	5		mavo	6	0	0	0	2261.1	2261.2	301.83	0	0	0	0	Borderline personality disorder	6	0	0	1
327	1	1	26	0	2	0	32	1	0	0	1	1	0	1	0	0	1	0	1	1	0	99	0	1	1	0	0	0	0	0	5		hbo	10	0	0	0	2261.2	313.82	301.83	301.82	0	0	0	avoidant personality disorder	6	0	0	1
328	2	1	18	0	2	1	48	0	1	0	1	1	0	1	0	0	1	0	1	1	0	99	1	1	0	1	0	0	1	0	2		lhno	4	0	0	0	295.7	0	2271.09	0	0	0	0	schizophrenia: Gedesorganiseerde type	2	6	0	0
329	2	1	21	0	2	0	26	1	0	0	1	1	1	1	0	0	1	0	1	1	0	1	0	1	1	0	0	0	1	0	0		mbo	4	1	0	0	296.43	0	301.4	0	0	0	0	Bipolaire I disorder: Laatste episode manisch, Matig	3	4	0	0
330	2	1	18	0	2	2	62	0	0	1	1	1	0	1	0	0	1	0	1	1	0	99	1	1	0	1	0	0	1	0	0		huishoudschool	4	0	0	0	298.9	0	2262.89	0	0	0	0	Psychotic disorder NAO	2	5	0	0
331	2	1	24	0	2	1	51	0	1	0	1	1	0	1	0	0	1	0	1	1	0	99	0	1	1	0	0	0	0	0	0		hbo	10	0	0	0	300.4	0	301.4	0	0	0	0	Obsessieve-compulsieve persoonlijkheids disorder	6	0	0	0
332	2	1	19	1	2	1	44	0	1	0	1	1	0	1	0	0	1	0	1	1	0	2	1	1	0	1	0	0	1	0	1		basisschool	1	0	0	0	309.81	0	2271.09	0	0	0	0	PTDS chronic	4	11	0	0
333	1	1	99	1	2	1	42	0	1	0	1	1	0	1	0	0	1	0	1	1	0	99	99	0	9	9	9	9	1	#NULL!	5		lts	4	0	99	99	300.19	2261.1	799.9	0	0	0	0	Nagebootste disorder: Met gecombineerde psychische en lichamelijke verschijnselen en klachten	0	1	0	1
334	1	1	24	0	2	2	63	0	0	1	1	1	0	1	0	0	1	0	1	1	0	2	0	1	1	0	0	0	0	0	0		mts	7	0	0	0	295.7	299	301.22	0	0	0	0	Schizoaffective disorder: Bipolar type	2	6	1	0
335	2	1	25	0	2	1	42	0	1	0	1	1	0	1	0	0	1	0	1	1	0	99	0	1	1	0	0	0	0	0	0		mavo	6	0	0	0	307.5	309.81	301.83	0	0	0	0	Aandachtstekort disorder met hyperactiviteit: Gecombineerde type	9	9	1	0
336	1	1	15	1	2	1	46	0	1	0	1	1	0	1	0	0	1	0	1	1	0	99	1	1	0	0	1	1	1	0	0		vmbo en vervolgens vabro techniek	4	1	0	0	312.3	2261.1	799.9	0	0	0	0	disorder in de impulsbeheersing NAO	0	1	0	0
337	2	1	19	0	2	0	25	1	0	0	1	1	0	1	0	0	1	0	1	1	0	1	1	1	0	1	0	0	0	0	0		mbo 3	7	0	0	0	300.02	296.21	317	0	0	0	0	Gegeneraliseerde angst disorder	4	2	0	0
338	2	1	24	0	2	1	56	0	1	0	1	1	0	1	0	0	1	0	1	1	0	1	0	1	1	0	0	0	0	0	0		modevakschool	7	1	0	0	295.9	0	2271.09	0	0	0	0	schizophrenia: Ongedifferentieerde type	2	6	0	0
339	1	1	27	0	2	1	44	0	1	0	1	1	0	1	0	0	1	0	1	1	0	99	0	1	1	0	0	0	0	0	0		universiteit	11	0	0	0	300.4	307.5	301.4	301.82	0	0	0	Personality disorder nao	6	0	0	0
340	1	1	22	0	2	0	33	1	0	0	1	1	0	1	0	0	1	0	1	1	0	1	0	1	1	0	0	0	1	0	0		mbo	4	1	0	0	295.9	0	2271.09	0	0	0	0	schizophrenia: paranoidtype	2	6	0	0
341	2	1	23	0	2	0	27	1	0	0	1	1	0	1	0	0	1	0	1	1	0	1	0	1	1	0	0	0	0	0	0	8	mbo4	7	0	0	0	300.23	300.4	301.82	0	0	0	0	Sociale fobie: Gegeneraliseerd	4	2	0	0
342	1	1	28	0	2	1	37	0	1	0	1	1	0	1	0	0	1	0	1	1	0	1	0	1	1	0	0	0	0	0	0	6	universiteit	11	0	0	0	295.3	299	301.2	0	0	0	0	schizophrenia: Resttype	2	6	1	0
343	1	1	5	0	2	2	63	0	0	1	1	1	0	1	0	0	1	0	1	1	0	1	1	1	0	0	1	1	1	0	0	0	ambachtschool	4	0	0	0								schizophrenia: Gedesorganiseerde type	2	6	0	1
345	1	1	21	0	2	1	43	0	1	0	1	1	2	1	0	0	1	0	1	1	0	1	0	1	1	0	0	0	1	0	0	4	mbo	4	1	0	0	299.8	292.9	2271.09	0	0	0	0	Waan disorder: Gemengd type	2	6	1	0
346	2	1	6	0	2	2	60	0	0	1	1	1	0	1	0	0	1	0	1	1	0	99	1	1	0	0	1	1	1	1	0	3	basisschool	1	0	0	1	295.9	0	2271.09	0	0	0	0	schizophrenia: paranoidtype	2	6	0	0
347	2	1	21	0	2	1	58	0	1	0	1	1	0	1	0	0	1	0	1	1	0	99	0	1	1	0	0	0	1	0	0	4	mbo	4	1	0	0	295.3	0	2271.09	0	0	0	0	schizophrenia: paranoidtype, Episodisch met restsymptomen tussen de episoden	2	6	0	0
348	2	1	21	0	2	1	53	0	1	0	1	1	0	1	0	0	1	0	1	1	0	99	0	1	1	0	0	0	0	0	0	5	hbo	10	0	0	0	296.56	296.44	799.9	0	0	0	0	Bipolaire I disorder: Laatste episode manisch, Ernstig met psychotische kenmerken	3	4	0	0
349	1	1	28	0	2	1	44	0	1	0	1	1	0	1	0	0	1	0	1	1	0	2	0	1	1	0	0	0	0	0	0	8	hbo	10	0	0	0	299.8	307.1	2271.09	0	0	0	0	Obsessieve-compulsieve disorder	4	2	1	0
350	2	1	21	0	2	0	34	1	0	0	1	1	0	1	0	0	1	0	1	1	0	2	0	1	1	0	0	0	1	0	0		spw nivo 2	4	0	0	0	303.9	314.9	2262.89	0	0	0	0	Aandachtstekort disorder met hyperactiviteit NAO	9	9	1	0
351	2	1	21	0	2	1	53	0	1	0	1	1	0	1	0	0	1	0	1	1	0	1	0	1	1	0	0	0	1	0	0	3	basisschool	1	0	0	0	300.23	296.32	301.6	301.82	0	0	0	Sociale fobie: Gegeneraliseerd	4	2	0	0
352	2	1	26	0	2	1	54	0	1	0	1	1	0	1	0	0	1	0	1	1	0	3	0	1	1	0	0	0	0	0	0	5	havo	8	0	0	0	300.4	300.02	301.83	0	0	0	0	Borderline personality disorder	6	0	0	0
353	1	1	24	0	2	1	51	0	1	0	1	1	0	1	0	0	1	0	1	1	0	6	0	1	1	0	0	0	0	0	0	5	mts	7	0	0	0	296.8	298.9	301.81	301.4	0	0	0	Bipolaire I disorder: Laatste episode manisch, Ernstig met psychotische kenmerken	3	4	0	0
354	2	1	24	0	2	0	31	1	0	0	1	1	0	1	0	0	1	0	1	1	0	1	0	1	1	0	0	0	1	0	0	4	mavo	5	1	0	0	309.81	2261.2	301.83	301.83	0	0	0	Borderline personality disorder	6	0	0	0
355	2	1	16	0	2	2	64	0	0	1	1	1	0	1	0	0	1	0	1	1	0	1	1	1	0	1	0	0	1	0	0	3	basisschool	1	0	0	0	309.81	0	2262.89	0	0	0	0	Posttraumatic stress- disorder	4	11	0	0
356	2	1	14	1	2	1	42	0	1	0	1	1	1	1	0	0	1	0	1	1	0	6	1	1	0	0	1	1	1	1	0		mbo	4	1	0	0	295.1	305.2	799.9	0	0	0	0	schizophrenia: Gedesorganiseerde type	2	6	0	0
358	2	1	23	0	2	1	47	0	1	0	1	1	1	1	0	0	1	0	1	1	0	2	0	1	1	0	0	0	0	0	0	5	mds	7	0	0	0	296.4	0	2271.09	0	0	0	0	Bipolaire I disorder: Laatste episode hypomaan	3	4	0	0
359	2	1	23	0	2	1	52	0	1	0	1	1	0	1	0	0	1	0	1	1	0	3	0	1	1	0	0	0	1	0	0	5	mavo	4	1	0	0	309.81	309.81	301.6	301.83	0	0	0	PTDS chronic	4	11	0	0
360	1	1	18	0	2	0	30	1	0	0	1	1	2	1	0	0	1	0	1	1	0	99	1	1	0	1	0	0	0	0	0	5	hbo	10	0	0	0	315.1	307.5	301.9	300.9	0	0	0	Anxiety disorder NAO	4	2	0	1
361	1	1	26	0	2	0	32	1	0	0	1	1	0	1	0	0	1	0	1	1	0	1	0	1	1	0	0	0	0	0	0	6	vwo	9	0	0	0	296.34	303.9	301.22	0	0	0	0	Depressieve disorder: Recidiverend, Ernstig met psychotische kenmerken	3	3	0	0
362	2	1	22	0	2	1	36	0	1	0	1	1	0	1	0	0	1	0	1	1	0	2	0	1	1	0	0	0	1	0	0	5	mbo	4	1	0	0	295.1	0	2271.09	0	0	0	0	schizophrenia: Gedesorganiseerde type	2	6	0	0
363	2	1	21	0	2	0	28	1	0	0	1	1	0	1	0	0	1	0	1	1	0	1	0	1	1	0	0	0	1	0	0	4	vmbo	4	1	0	0	300.29	312.3	301.83	301.82	0	0	0	Borderline personality disorder	6	0	0	0
364	2	1	23	0	2	1	42	0	1	0	1	1	1	1	0	0	1	0	1	1	0	2	0	1	1	0	0	0	1	0	0	5	mbo	4	1	0	0	296.44	0	2271.09	0	0	0	0	Bipolaire I disorder: Laatste episode manisch, Volledig in remissie	3	4	0	0
365	2	1	99	0	2	1	47	0	1	0	1	1	0	1	0	0	1	0	1	1	0	3	99	0	9	9	9	9	0	0	0	6	vwo	9	0	0	0	298.9	0	301.9	0	0	0	0	Personality disorder nao	6	0	0	0
366	1	1	99	0	2	1	43	0	1	0	1	1	0	1	0	0	1	0	1	1	0	1	99	0	9	9	9	9	1	2	2		mbo2	4	0	99	99	295.7	291.9	799.9	0	0	0	0	Psychotic disorder NAO	2	5	0	0
367	1	1	14	0	2	1	51	0	1	0	1	1	0	1	0	0	1	0	1	1	0	1	1	1	0	0	1	1	1	0	0	2	lts	4	0	0	0	295.9	2262.2	2271.09	0	0	0	0	schizophrenia: paranoidtype	2	6	0	0
368	2	1	22	0	2	2	64	0	0	1	1	1	0	1	0	0	1	0	1	1	0	1	0	1	1	0	0	0	1	0	1		l.o.	1	0	0	0	2261.2	296.31	301.82	0	0	0	0	Dysthyme disorder	3	3	0	1
369	2	1	22	0	2	1	56	0	1	0	1	1	0	1	0	0	1	0	1	1	0	99	0	1	1	0	0	0	0	0	0	5	mavo 4	6	0	0	0	296.32	300	301.6	0	0	0	0	Anxiety disorder NAO	4	2	0	0
370	1	1	99	1	2	1	37	0	1	0	1	1	0	1	0	0	1	0	1	1	0	1	99	0	9	9	9	9	9	1	1		middelbare school	99	99	1	1	309.81	300.3	301.6	0	0	0	0	Posttraumatic stress- disorder	4	11	0	0
371	1	1	24	0	2	1	46	0	1	0	1	1	0	1	0	0	1	0	1	1	0	3	0	1	1	0	0	0	0	0	0	7	mbo/vwo	7	1	0	0	298.9	304.3	2271.09	0	0	0	0	schizophrenia: Gedesorganiseerde type, Ononderbroken	2	6	0	0
372	2	1	25	0	2	1	36	0	1	0	1	1	0	1	0	0	1	0	1	1	0	99	0	1	1	0	0	0	1	0	0	5	mavo	5	1	0	0	309.81	298.9	301.82	0	0	0	0	schizophrenia: Ongedifferentieerde type	2	6	0	0
373	2	1	6	0	2	1	51	0	1	0	1	1	0	1	0	0	1	0	1	1	0	3	1	1	0	0	1	1	1	1	1	0	met 11 jaar gestopt met school	1	0	0	1	300.4	307.44	301.6	0	0	0	0	Afhankelijke persoonlijkheids disorder	6	3	0	0
374	2	1	27	0	2	1	56	0	1	0	1	1	0	1	0	0	1	0	1	1	0	2	0	1	1	0	0	0	1	0	0	4	mbo	4	1	0	0	296.3	0	301.4	0	0	0	0	Depressieve disorder: Recidiverend, Ernstig met psychotische kenmerken	3	3	0	0
375	1	1	20	0	2	0	31	1	0	0	1	1	1	1	0	0	1	0	1	1	0	2	0	1	1	0	0	0	1	0	0	4	mbo	4	1	0	0	298.9	299.8	799.9	0	0	0	0	Pervasieve ontwikkelings disorder NAO	9	9	1	0
376	2	1	26	0	2	1	44	0	1	0	1	1	2	1	0	0	1	0	1	1	0	1	0	1	1	0	0	0	0	0	0	5	havo	8	0	0	0	299	309.81	2271.09	0	0	0	0	Psychotic disorder NAO	2	5	1	0
377	2	1	14	0	2	1	36	0	1	0	1	1	0	1	0	0	1	0	1	1	0	99	1	1	0	0	1	1	1	0	0	4	bvb	4	1	0	0	314.01	304.3	301.83	0	0	0	0	Borderline personality disorder	6	0	1	0
378	2	1	24	0	2	1	55	0	1	0	1	1	0	1	0	0	1	0	1	1	0	2	0	1	1	0	0	0	0	0	0	6	hbo	10	0	0	0	296.3	0	301.9	0	0	0	0	Bipolaire I disorder: Laatste episode depressief, Matig	3	4	0	0
379	1	1	17	0	2	0	34	1	0	0	1	1	0	1	0	0	1	0	1	1	0	1	1	1	0	1	0	0	1	0	0	4	basisschool	1	0	0	0	299				0	0	0	Pervasieve ontwikkelings disorder NAO	9	9	1	0
381	1	1	23	0	2	1	56	0	1	0	1	1	0	1	0	0	1	0	1	1	0	1	0	1	1	0	0	0	0	0	0	4	hbo	10	0	0	0	296.52	299	301.9	301.6	0	0	0	Bipolaire I disorder: Laatste episode depressief, Matig	3	4	1	0
382	2	1	26	0	2	1	45	0	1	0	1	1	2	1	0	0	1	0	1	1	0	2	0	1	1	0	0	0	0	0	0	4	mavo	6	0	0	0	296.8	2261.2	2271.09	0	0	0	0	Bipolaire disorder NAO	3	4	0	0
383	2	1	24	0	2	1	49	0	1	0	1	1	0	1	0	0	1	0	1	1	0	3	0	1	1	0	0	0	1	0	0	6	leao	4	0	0	0	296.89	307.5	301.9	0	0	0	0	PTDS chronic	4	11	0	0
384	1	1	12	0	2	0	35	1	0	0	1	1	0	1	0	0	1	0	1	1	0	1	1	1	0	0	1	1	1	0	0		vmbo	4	1	0	0	295.3	0	2271.09	0	0	0	0	schizophrenia: paranoidtype, ononderbroken	2	6	0	0
385	2	1	20	0	2	1	41	0	1	0	1	1	0	1	0	0	1	0	1	1	0	1	0	1	1	0	0	0	1	0	0	6	mbo	4	1	0	0	300.4	0	301.83	301.4	0	0	0	Borderline personality disorder	6	0	0	0
386	2	1	15	1	2	2	60	0	0	1	1	1	0	1	0	0	1	0	1	1	0	99	1	1	0	0	1	1	1	0	0	2.5	lagere school	1	0	0	0	295.9	0	2262.89	0	0	0	0	schizophrenia: Ongedifferentieerde type	2	6	0	0
388	1	1	18	0	2	1	38	0	1	0	1	1	0	1	0	0	1	0	1	1	0	1	1	1	0	1	0	0	1	0	0	2	vmbo	4	1	0	0	295.3	305.2	2271.09	0	0	0	0	schizophrenia: paranoidtype	2	6	0	0
389	1	1	19	0	2	1	42	0	1	0	1	1	0	1	0	0	1	0	1	1	0	6	1	1	0	1	0	0	1	0	0	5	mbo	4	1	0	0	295.3	312.31	301.6		0	0	0	schizophrenia: paranoidtype	2	6	0	0
390	1	1	11	1	2	1	44	0	1	0	1	1	0	1	0	0	1	0	1	1	0	1	1	1	0	0	1	1	0	1	0	3	mavo	6	0	0	1	298.9	304.3	2271.09	0	0	0	0	Psychotic disorder NAO	2	5	0	0
391	1	1	18	0	2	1	38	0	1	0	1	1	0	1	0	0	1	0	1	1	0	99	1	1	0	1	0	0	1	0	1		basisschool	1	0	0	0	295.3				0	0	0	Psychotic disorder NAO	2	5	0	0
392	2	1	99	0	2	1	45	0	1	0	1	1	0	1	0	0	1	0	1	1	0	1	99	0	9	9	9	9	0	2	2		HBO	10	0	99	99	296.3	307.5	301.6	301.83	0	0	0	Afhankelijke persoonlijkheids disorder	6	3	0	0
393	1	1	99	0	2	0	31	1	0	0	1	1	0	1	0	0	1	0	1	1	0	2	99	0	9	9	9	9	0	2	2		spw 3	7	0	99	99	295.3	300.4	2271.09	0	0	0	0	schizophrenia: paranoidtype	2	6	0	0
394	2	1	18	0	2	1	39	0	1	0	1	1	0	1	0	0	1	0	1	1	0	3	1	1	0	1	0	0	1	0	0	4	mbo	4	1	0	0	312.3	2261.2	301.9	0	0	0	0	Personality disorder nao	6	0	0	0
397	2	1	99	0	2	1	57	0	1	0	1	1	0	1	0	0	1	0	1	1	0	3	99	0	9	9	9	9	1	2	2		ziekenverzorger	4	1	99	99	295.7	0	301.9	0	0	0	0	Schizoaffective disorder: Bipolar type	2	6	0	0
398	2	1	99	0	2	1	43	0	1	0	1	1	0	1	0	0	1	0	1	1	0	1	99	0	9	9	9	9	0	2	2		mavo	6	0	99	99	296.4	300.3	301.6	301.6	0	0	0	Bipolaire I disorder: Laatste episode hypomaan	3	4	0	0
399	1	1	99	0	2	1	43	0	1	0	1	1	0	1	0	0	1	0	1	1	0	2	99	0	9	9	9	9	0	2	2		havo	8	0	99	99	304.3	296.33	301.83	0	0	0	0	Borderline personality disorder	6	0	0	0
400	1	1	99	0	2	1	55	0	1	0	1	1	0	1	0	0	1	0	1	1	0	3	99	0	9	9	9	9	0	2	2		hbo	10	0	99	99	296.8	0	301.81	0	0	0	0	Bipolaire I disorder: Laatste episode depressief, Niet-gespecificeerd	3	4	0	0
402	2	1	99	0	2	1	59	0	1	0	1	1	0	1	0	0	1	0	1	1	0	2	99	0	9	9	9	9	1	2	2		LO	1	0	99	99	309.81	300.4	301.6	301.82	0	0	0	PTDS chronic	4	11	0	0
404	1	1	99	0	2	1	45	0	1	0	1	1	0	1	0	0	1	0	1	1	0	2	99	0	9	9	9	9	1	2	2		MBO2	4	0	99	99	296.8	0	2271.09	0	0	0	0	Bipolaire I disorder: Laatste episode niet-gespecificeerd	3	4	0	0
405	1	1	99	0	2	1	39	0	1	0	1	1	0	1	0	0	1	0	1	1	0	1	99	0	9	9	9	9	1	2	2		VBO (C-D niveau).	4	1	99	99	296.4	0	2262.89	0	0	0	0	Bipolaire I disorder: Laatste episode hypomaan	3	4	0	0
406	1	1	99	0	2	1	57	0	1	0	1	1	0	1	0	0	1	0	1	1	0	1	99	0	9	9	9	9	0	2	2		vwo	9	0	99	99	300.02	311	301.6	301.9	0	0	0	Gegeneraliseerde angst disorder	4	2	0	0
407	1	1	99	0	2	0	32	1	0	0	1	1	0	1	0	0	1	0	1	1	0	1	99	0	9	9	9	9	1	2	2		MBO Electro 2	4	0	99	99	295.3	304.3	2271.09	0	0	0	0	schizophrenia: paranoidtype	2	6	0	0
408	2	1	99	0	2	1	44	0	1	0	1	1	0	1	0	0	1	0	1	1	0	1	99	0	9	9	9	9	1	2	2		LEAO	4	0	99	99	296.89	299.8	301.6	0	0	0	0	Bipolaire II disorder	3	4	1	0
410	1	1	99	0	2	1	59	0	1	0	1	1	0	1	0	0	1	0	1	1	0	2	99	0	9	9	9	9	1	2	2		mbo	4	1	99	99	309.81	0	301.82	0	0	0	0	PTDS chronic	4	11	0	0
411	1	1	99	0	2	2	66	0	0	1	1	1	0	1	0	0	1	0	1	1	0	2	99	0	9	9	9	9	0	2	2		hts	10	0	99	99	296.32	2261.9	301.81	301.4	0	0	0	Narcistische persoonlijkheids disorder	6	0	0	0
412	1	1	99	0	2	1	39	0	1	0	1	1	0	1	0	0	1	0	1	1	0	3	99	0	9	9	9	9	1	2	2		mbo	4	1	99	99	291.9	300.15	301.9	0	0	0	0	Depressieve disorder: Recidive Medium	3	3	0	0
413	1	1	99	0	2	1	53	0	1	0	1	1	0	1	0	0	1	0	1	1	0	1	99	0	9	9	9	9	0	2	2		mavo	6	0	99	99	298.9	296.22	2271.09	0	0	0	0	Psychotic disorder NAO	2	5	0	0
414	2	1	99	0	2	0	33	1	0	0	1	1	0	1	0	0	1	0	1	1	0	1	99	0	9	9	9	9	1	2	2		vmbo	4	1	99	99	309.81	0	301.83	0	0	0	0	Posttraumatic stress- disorder	4	11	0	0
415	1	1	99	0	2	1	49	0	1	0	1	1	0	1	0	0	1	0	1	1	0	1	99	0	9	9	9	9	1	2	2		basisschool	1	0	99	99	311	311	799.9	0	0	0	0	Depressieve disorder NAO	3	3	0	0
416	1	1	99	0	2	2	62	0	0	1	1	1	0	1	0	0	1	0	1	1	0	1	99	0	9	9	9	9	1	2	2		lagere school	1	0	99	99	295.9	309.81	301.6	0	0	0	0	schizophrenia: paranoidtype	2	6	0	0
417	2	1	99	0	2	0	24	1	0	0	1	1	0	1	0	0	1	0	1	1	0	6	99	0	9	9	9	9	1	2	2		basisschool	1	0	99	99	292.89	309.81	301.83	301.83	0	0	0	Borderline personality disorder	6	11	0	0
418	2	1	99	0	2	2	60	0	0	1	1	1	0	1	0	0	1	0	1	1	0	3	99	0	9	9	9	9	1	2	2		basisschool	1	0	99	99	309.81	298.9	301.9	0	0	0	0	PTDS chronic	4	11	0	0
419	1	1	99	0	2	1	54	0	1	0	1	1	0	1	0	0	1	0	1	1	0	1	99	0	9	9	9	9	1	2	2		LBO	4	0	99	99	302.2	0	301	301.4	0	0	0	Paranoide persoonlijkheids disorder	6	0	0	0
423	2	1	99	0	2	1	52	0	1	0	1	1	0	1	0	0	1	0	1	1	0	3	99	0	9	9	9	9	1	2	2		mbo 2	4	0	99	99	296.8	2262.2	2271.09	0	0	0	0	Bipolaire I disorder: Laatste episode depressief, Gedeeltelijk in remissie	3	4	0	0
424	1	1	99	1	2	0	29	1	0	0	1	1	0	1	0	0	1	0	1	1	0	1	99	0	9	9	9	9	1	2	2		lbo	4	0	99	99	295.3	0	2271.09	0	0	0	0	schizophrenia: paranoidtype, Episodisch met restsymptomen tussen de episoden	2	6	0	0
426	1	1	99	0	2	1	46	0	1	0	1	1	0	1	0	0	1	0	1	1	0	2	99	0	9	9	9	9	0	2	2		hts	10	0	99	99	296.89	299.8	2271.09	0	0	0	0	Bipolaire II disorder: Depressief	3	4	1	0
427	2	1	99	0	2	2	64	0	0	1	1	1	0	1	0	0	1	0	1	1	0	4	99	0	9	9	9	9	1	2	2		geen	0	0	99	99	295.7	0	301.6	301.82	0	0	0	Schizoaffective disorder: Bipolar type	2	6	0	0
428	1	1	16	0	2	1	47	0	1	0	1	1	0	1	0	0	1	0	1	1	0	1	1	1	0	1	0	0	1	0	0	3	mbo	4	1	0	0	295.3	297.1	301.9	0	0	0	0	schizophrenia: paranoidtype, Episodisch met restsymptomen tussen de episoden	2	6	0	0
430	2	1	99	0	2	1	48	0	1	0	1	1	0	1	0	0	1	0	1	1	0	1	99	0	9	9	9	9	0	2	2		mavo	6	0	99	99	299.8	309.81	301.83	0	0	0	0	Asperger	9	9	1	0
431	1	1	14	0	2	0	23	1	0	0	1	1	0	1	0	0	1	0	1	1	0	99	1	1	0	0	1	1	1	0	0	6	mbo	4	1	0	0	298.9	0	317	0	0	0	0	schizophrenia: Gedesorganiseerde type	2	6	0	0
432	2	1	22	0	2	0	34	1	0	0	1	1	0	1	0	0	1	0	1	1	0	99	0	1	1	0	0	0	0	0	0	8	universiteit	11	0	0	0	298.9	314	799.9	0	0	0	0	Psychotic disorder NAO	2	5	1	0
433	1	1	26	0	2	1	37	0	1	0	1	1	0	1	0	0	1	0	1	1	0	1	0	1	1	0	0	0	0	0	0	6	universiteit	11	0	0	0	299	298.9	2271.09	0	0	0	0	Psychotic disorder NAO	2	5	1	0
434	1	1	28	0	2	0	31	1	0	0	1	1	0	1	0	0	1	0	1	1	0	2	0	1	1	0	0	0	0	1	0	4	hbo	10	0	0	0	298.9	304.3	2271.09	0	0	0	0	Psychotic disorder NAO	2	5	0	0
435	1	1	22	0	2	1	36	0	1	0	1	1	0	1	0	0	1	0	1	1	0	3	0	1	1	0	0	0	1	0	0	4	mavo	5	1	0	0	298.9	299	301.5	301.83	0	0	0	Asperger	9	9	1	0
436	1	1	18	0	2	1	38	0	1	0	1	1	2	1	0	0	1	0	1	1	0	1	1	1	0	1	0	0	0	0	0		hbo	10	0	0	0	299		301.9		0	0	0	Personality disorder nao	6	0	1	0
437	1	1	22	0	2	1	49	0	1	0	1	1	2	1	0	0	1	0	1	1	0	1	0	1	1	0	0	0	0	0	0	8	hbo propedeuse	10	0	0	0	295.7	0	2271.09	0	0	0	0	Schizoaffective disorder: Bipolar type	2	6	0	0
438	1	1	22	0	2	0	27	1	0	0	1	1	0	1	0	0	1	0	1	1	0	1	0	1	1	0	0	0	0	0	0	8	havo	8	0	0	0	298.9	299	2271.09	0	0	0	0	Psychotic disorder NAO	2	5	1	0
439	2	1	26	0	2	0	25	1	0	0	1	1	0	1	0	0	1	0	1	1	0	2	0	1	1	0	0	0	0	0	0	9	hbo	10	0	0	0	298.9	300.29	301.9	0	0	0	0	Kortdurende psychotische disorder	2	5	0	0
440	1	1	24	0	2	2	60	0	0	1	1	1	0	1	0	0	1	0	1	1	0	99	0	1	1	0	0	0	0	0	0	7	vwo	9	0	0	0	296.36	299.8	2271.09	0	0	0	0	PDD-Nos	9	9	1	0
441	2	1	22	0	2	2	62	0	0	1	1	1	0	1	0	0	1	0	1	1	0	2	0	1	1	0	0	0	1	0	0	4	mms	5	1	0	0	296.56	309.81	301.9	0	0	0	0	PTDS chronic	4	11	0	0
444	2	1	22	0	1	1	49	0	1	0	2	1	2	1	0	1	0	0	1	1	0	3	0	1	1	0	0	0	1	0	0	2	3e jaar lts	4	0	0	0	298.9	309.81	2262.89	301.82	0	0	0	Anxiety disorder NAO	4	2	0	0
446	2	1	25	0	1	1	48	0	1	0	2	1	0	1	0	1	0	0	1	1	0	1	0	1	1	0	0	0	0	0	0	5	havo	8	0	0	0	296.44	291.9	301.83	0	0	0	0	Psychotic disorder NAO	2	5	0	0
447	1	1	19	0	1	1	38	0	1	0	2	1	0	1	0	1	0	0	1	1	0	99	1	1	0	1	0	0	1	#NULL!	5		mavo	5	1	0	0	300.23	304.8	301.83	301.6	0	0	0	Borderline persoonlijkheidsstoorn.	6	0	0	0
449	2	1	11	1	1	0	19	1	0	0	2	1	2	1	0	1	0	0	1	1	0	1	1	1	0	0	1	1	1	2	0		mbo1	4	0	0	0	313.89	314.01	799.9	0	0	0	0	Aandachtstekort disorder met hyperactiviteit:overwegend hyperactief-impuls type	9	9	1	0
450	2	1	18	0	1	1	51	0	1	0	2	1	2	1	0	1	0	0	1	1	0	3	1	1	0	1	0	0	1	0	0	4	mavo	5	1	0	0	296.4	0	301.6	2262.89	0	0	0	Bipoliaire-1- disorder:laatste episode hypomaan	3	4	0	0
451	2	1	15	0	1	0	30	1	0	0	2	1	0	1	0	1	0	0	1	1	0	99	1	1	0	0	1	1	1	#NULL!	5		vmbo	4	1	0	0	296.04	0	2271.09	0	0	0	0	Bipol. I st. eenm.man.epi.ern.m.psy	3	4	0	0
452	1	1	11	0	1	1	39	0	1	0	2	1	0	1	0	1	0	0	1	1	0	1	1	1	0	0	1	1	1	0	0	2	2e klas mavo	1	0	0	0	292.11	298.9	2271.09	0	0	0	0	Psychotic disorder NAO	2	5	0	0
453	1	1	25	0	1	0	23	1	0	0	2	1	0	1	0	1	0	0	1	1	0	1	0	1	1	0	0	0	1	0	0	2	mbo 2	4	0	0	0	309.81	304.3	799.9	0	0	0	0	Depressieve disorder NAO	3	3	0	0
454	2	1	16	0	1	0	30	1	0	0	2	1	0	1	0	1	0	0	1	1	0	99	1	1	0	1	0	0	1	#NULL!	5		mbo	4	1	0	0	300	311	2271.09	0	0	0	0	Depressieve st. eenm.epi. matig	3	3	0	0
455	1	1	15	0	1	1	48	0	1	0	2	1	0	1	0	1	0	0	1	1	0	1	1	1	0	0	1	1	0	0	0	4	vmbo t	6	0	0	0	296.32	0	2271.09	317	0	0	0	Depressieve disorder:eenmalige episode, ernstig zonder psychotische kenmerken	3	3	0	0
458	1	1	11	0	1	1	37	0	1	0	2	1	2	1	0	1	0	0	1	1	0	1	1	1	0	0	1	1	1	0	0	3	lts niet afgemaakt	1	0	0	0	299	300.3	2271.09	0	0	0	0	Autistische disorder	9	9	1	0
459	2	1	9	0	1	0	23	1	0	0	2	1	0	1	0	1	0	0	1	1	0	99	1	1	0	0	1	1	1	#NULL!	5		basisschool	1	0	0	0	299.8	313.82	317	0	0	0	0	Lichte zwakzinnigheid	7	0	1	0
461	1	1	12	1	1	0	33	1	0	0	2	1	1	1	0	1	0	0	1	1	0	1	1	1	0	0	1	1	0	0	0	6	hbo	10	0	0	0	300	296.24	799.9	0	0	0	0	Anxiety disorder NAO	4	2	0	0
463	2	1	6	1	1	1	55	0	1	0	2	1	2	1	0	1	0	0	1	1	0	3	1	1	0	0	1	1	1	1	1		geen	0	0	99	99	298.9	300.11	799.9	0	0	0	0	Psychotic disorder NAO	2	5	0	0
464	1	1	21	0	1	0	29	1	0	0	2	1	0	1	0	1	0	0	1	1	0	1	0	1	1	0	0	0	0	0	0		mbo4	7	0	0	0	299	296.36	2271.09	0	0	0	0	Aan alcohol gebonden disorder NAO	1	8	0	0
465	1	1	3	1	1	0	26	1	0	0	2	1	0	1	0	1	0	0	1	1	0	99	1	1	0	0	1	1	1	#NULL!	5		Geen	0	0	99	99	298.9	0	2271.09	0	0	0	0	Psychotic disorder NAO	2	5	0	0
466	2	1	23	0	1	0	28	1	0	0	2	1	0	1	0	1	0	0	1	1	0	99	0	1	1	0	0	0	0	#NULL!	5		mbo3	7	0	0	0	296.32	0	301.9	0	0	0	0	Misbruik van alcohol	1	8	0	0
467	2	1	13	0	1	1	52	0	1	0	2	1	0	1	0	1	0	0	1	1	0	2	1	1	0	0	1	1	1	0	0		las	3	1	0	0	311	309.4	799.9	0	0	0	0	Depressieve disorder:eenmalige episode, niet-gespecificeerd	3	3	0	0
468	2	1	24	0	1	1	57	0	1	0	2	1	0	1	0	1	0	0	1	1	0	3	0	1	1	0	0	0	0	0	0	6	mavo 4	6	0	0	0	296.36	2261.8	301.6	301.82	0	0	0	Depressieve disorder:eenmalige episode, ernstig zonder psychotische kenmerken	3	3	0	0
469	2	1	19	0	1	0	24	1	0	0	2	1	0	1	0	1	0	0	1	1	0	1	1	1	0	1	0	0	0	0	0		vmbo tl	6	0	0	0	309.81	314.9	301.83	0	0	0	0	Borderline personality disorder	6	0	1	0
470	2	1	15	0	1	0	33	1	0	0	2	1	0	1	0	1	0	0	1	1	0	6	1	1	0	0	1	1	0	0	0	4	mbo3	7	0	0	0	296.32	314.9	799.9	0	0	0	0	Depressieve disorder:recidiverend, ernstig zonder psychotische kenmerken	3	3	1	0
472	1	1	24	0	1	0	24	1	0	0	2	1	0	1	0	1	0	0	1	1	0	1	0	1	1	0	0	0	1	0	0		vmbo kader	4	0	0	0	296.23	2262.82	799.9	0	0	0	0	Depressieve disorder:eenmalige episode,ernstig-zonder psychotische kenmerken	3	3	0	0
473	1	1	25	0	1	1	59	0	1	0	2	1	0	1	0	1	0	0	1	1	0	3	0	1	1	0	0	0	0	0	0	5	hbo	10	0	0	0	296.32	316	799.9	0	0	0	0	Depressieve disorder:recidiverend, Matig	3	3	0	0
474	1	1	20	0	1	1	52	0	1	0	2	1	0	1	0	1	0	0	1	1	0	2	0	1	1	0	0	0	0	0	0	5	hbo	10	0	0	0	300	296.22	301.4	301.6	0	0	0	Anxiety disorder NAO	4	2	0	0
475	2	1	20	0	1	0	35	1	0	0	2	1	0	1	0	1	0	0	1	1	0	3	0	1	1	0	0	0	0	0	0	5	mbo 4	7	0	0	0	312.9	305.9	301.9	0	0	0	0	Persoonlijkheids disorder NAO	6	0	1	0
476	2	1	23	0	1	0	26	1	0	0	2	1	0	1	0	1	0	0	1	1	0	1	0	1	1	0	0	0	0	0	0	4	mbo4	7	0	0	0	296.26	0	799.9	0	0	0	0	Depressieve disorder:eenmalige episode, ernstig zonder psychotische kenmerken	3	3	0	0
477	2	1	21	0	1	1	46	0	1	0	2	1	0	1	0	1	0	0	1	1	0	99	0	1	1	0	0	0	1	#NULL!	5		lagere school	1	0	99	99								Depressieve disorder: Eenmalige episode,	3	3	0	1
478	1	1	20	0	1	1	41	0	1	0	2	1	0	1	0	1	0	0	1	1	0	1	0	1	1	0	0	0	1	0	0	4	mavo	5	1	0	0	296.32	2262.2	301.82	301.82	0	0	0	Persoonlijkheids disorder NAO	6	0	0	0
479	1	1	3	1	1	1	51	0	1	0	2	1	0	1	0	1	0	0	1	1	0	2	1	1	0	0	1	1	1	1	1		lagere school	1	0	99	99	296.32	0	799.9	0	0	0	0	Depressieve disorder:recidiverend, ernstig met psychotische kenmerken	3	3	0	0
481	2	1	16	0	1	1	52	0	1	0	2	1	0	1	0	1	0	0	1	1	0	3	1	1	0	1	0	0	1	0	2		huishoudschool	4	0	0	0	300.9	2262.81	799.9	0	0	0	0	Niet gespecificeerde psychische disorder (niet-psychotisch)	0	0	0	0
482	2	1	27	0	1	1	50	0	1	0	2	1	0	1	0	1	0	0	1	1	0	3	0	1	1	0	0	0	0	0	0		hbo	10	0	0	0	2262.81	296.36	301.6	301.83	0	0	0	Depressieve disorder:recidiverend, matig	3	3	0	1
483	1	1	26	0	1	0	23	1	0	0	2	1	0	1	0	1	0	0	1	1	0	1	0	1	1	0	0	0	1	0	0		vmbo	4	1	0	0	309.81	292.9	301.9	0	0	0	0	Posttraumatische stress disorder:Chronisch	4	11	0	0
484	1	1	27	0	1	1	46	0	1	0	2	1	0	1	0	1	0	0	1	1	0	3	0	1	1	0	0	0	0	0	0	5	LTS D/havo	8	0	0	0	311	304.4	301.9	301.81	0	0	0	Niet gespecificeerde psychische disorder (niet-psychotisch)	0	0	0	0
485	1	1	14	0	1	1	53	0	1	0	2	1	1	1	0	1	0	0	1	1	0	1	1	1	0	0	1	1	1	0	0	4	lts b	3	0	0	0	298.9	296.8	301.9	0	0	0	0	Bipolaire-I- disorder.Laatste episode depressief, ernstig met psychotische kenmerken	3	4	0	0
486	2	1	9	0	1	0	31	1	0	0	2	1	0	1	0	1	0	0	1	1	0	1	1	1	0	0	1	1	0	0	0	4	mbo3	7	0	0	0	292.12	298.9	301.9	2262.89	0	0	0	Psychotische disorder door een middel:Amfetamine (of amfetamine-achtig middel), met hallucinaties	2	5	0	0
488	2	1	21	0	1	0	29	1	0	0	2	1	0	1	0	1	0	0	1	1	0	6	0	1	1	0	0	0	0	0	0	4	mbo3	7	0	0	0	296.32	0	301.6	0	0	0	0	Afhankelijke persoonlijkheids disorder	6	3	0	0
489	1	1	22	0	1	1	53	0	1	0	2	1	0	1	0	1	0	0	1	1	0	99	0	1	1	0	0	0	0	#NULL!	5		mbo4	7	0	0	0	296.26	300.01	301.82	0	0	0	0	Ontwijkende persoonlijkheidsstoorn.	6	0	0	0
490	2	1	17	0	1	0	25	1	0	0	2	1	0	1	0	1	0	0	1	1	0	1	1	1	0	1	0	0	1	0	0	4	mbo	4	1	0	0	312.3	0	301.83	0	0	0	0	Borderline personality disorder	6	0	0	0
491	1	1	17	0	1	0	24	1	0	0	2	1	2	1	0	1	0	0	1	0	2	1	1	1	0	1	0	0	1	1	0		mbo2	4	0	0	0	298.9	304.3	799.9	0	0	0	0	Psychotic disorder NAO	2	5	0	0
492	2	1	14	0	1	1	58	0	1	0	2	1	0	1	0	1	0	0	1	1	0	99	1	1	0	0	1	1	0	#NULL!	5		mbo,mavo	6	0	0	0	311	303.9	301.9	0	0	0	0	Alcohol gebonden disorder NAO	1	3	0	0
493	1	1	99	0	1	1	46	0	1	0	2	1	0	1	0	1	0	0	1	1	0	1	99	0	9	9	9	9	1	#NULL!	5		mbo	4	1	0	0	300	2262.81	319	0	0	0	0	Zwakzinnigheid, ernst n.gespecif.	7	0	0	0
494	2	1	19	0	1	1	37	0	1	0	2	1	2	1	0	1	0	0	1	1	0	1	1	1	0	1	0	0	1	0	0	4	ivo mavo	5	0	0	0	298.9	304.3	301.83	317	0	0	0	Psychotic disorder NAO	2	5	0	0
499	2	1	19	0	1	0	31	1	0	0	2	1	0	1	0	1	0	0	1	1	0	1	1	1	0	1	0	0	1	0	0		mbo	4	1	0	0	311	0	301.9	0	0	0	0	Depressieve disorder:recidiverend, ernstig met psychotische kenmerken	3	3	0	0
500	1	1	22	0	1	1	59	0	1	0	2	1	0	1	0	1	0	0	1	1	0	1	0	1	1	0	0	0	0	1	1		mavo en havo op aruba	8	0	0	0	295.3	0	799.9	0	0	0	0	schizophrenia: gedesoriënteerd type	2	6	0	0
501	2	1	14	0	1	2	63	0	0	1	2	1	0	1	0	1	0	0	1	1	0	1	1	1	0	0	1	1	9	0	0	2	kostumeren	99	99	0	0	296.4	0	2271.09	0	0	0	0	Bipolaire-1- disorder:laatste episode gemengd	3	4	0	0
502	1	1	22	0	1	1	57	0	1	0	2	1	0	1	0	1	0	0	1	1	0	99	0	1	1	0	0	0	0	#NULL!	5		mbo hbo??	7	1	0	0									0	0	0	1
503	1	1	20	0	1	1	41	0	1	0	2	1	0	1	0	1	0	0	1	1	0	2	0	1	1	0	0	0	1	0	0	4	mbo	4	1	0	0								Depressieve disorder:recidiverend, niet-gespecificeerd	3	3	0	1
504	1	1	22	0	1	0	27	1	0	0	2	1	0	1	0	1	0	0	1	1	0	1	0	1	1	0	0	0	0	0	0	5	vwo	9	0	0	0	295.9	304.3	2271.09	0	0	0	0	schizophreniaParanoïd type	2	6	0	0
505	1	1	24	0	1	1	52	0	1	0	2	1	0	1	0	1	0	0	1	1	0	1	0	1	1	0	0	0	0	0	0	5	havo	8	0	0	0	309.81	309.81	301.82	0	0	0	0	avoidant personality disorder	6	0	0	0
507	1	1	26	0	1	1	36	0	1	0	2	1	2	1	0	1	0	0	1	1	0	1	0	1	1	0	0	0	1	0	0	4	geen	0	0	0	0	298.9	295.7	2271.09	0	0	0	0	Psychotic disorder NAO	2	5	0	0
508	2	1	16	0	1	1	58	0	1	0	2	1	0	1	0	1	0	0	1	1	0	99	1	1	0	1	0	0	0	#NULL!	5		hbo	10	0	0	0	296.44	0	799.9	0	0	0	0	Depressieve disorder NAO	3	3	0	0
509	1	1	21	0	1	1	38	0	1	0	2	1	0	1	0	1	0	0	1	1	0	99	0	1	1	0	0	0	1	#NULL!	5		mbo1	4	0	0	0	799.9	0	2271.09	0	0	0	0	diagnose uitgesteld	0	1	0	0
511	2	1	24	0	1	0	35	1	0	0	2	1	2	1	0	1	0	0	1	1	0	99	0	1	1	0	0	0	0	#NULL!	5		havo	8	0	0	0	309.81	296.32	301.9	0	0	0	0	Geen diagnose of aandoening op As I of As II	0	1	0	0
512	2	1	14	0	1	1	37	0	1	0	2	1	0	1	0	1	0	0	1	1	0	1	1	1	0	0	1	1	1	0	0	4	basisschool	1	0	0	0								Aan alcohol gebonden disorder NAO	1	8	0	1
514	1	1	23	0	1	1	45	0	1	0	2	1	2	1	0	1	0	0	1	1	0	1	0	1	1	0	0	0	1	0	0		lts d	4	0	0	0	298.9	0	799.9	0	0	0	0	Psychotic disorder NAO	2	5	0	0
517	2	1	11	0	1	1	51	0	1	0	2	1	2	1	0	1	0	0	1	1	0	2	1	1	0	0	1	1	1	0	0	4	huishoudschool	4	0	0	0	309.81	0	317	0	0	0	0	Posttraumatische stress disorder:met verlaat begin	4	11	0	0
518	1	1	21	0	1	2	62	0	0	1	2	1	1	1	0	1	0	0	1	1	0	1	0	1	1	0	0	0	0	0	0	5	hbo	10	0	0	0	296.8	300.3	301.9	0	0	0	0	Bipolaire-I- disorder:eenmalige manische episode, ernstig met psychotische kenmerken	3	4	0	0
519	1	1	22	0	1	2	61	0	0	1	2	1	0	1	0	1	0	0	1	1	0	99	0	1	1	0	0	0	0	#NULL!	5		mts?	7	0	0	0	303.9	2262.81	301.9	0	0	0	0	Personality disorder nao	6	0	0	0
522	1	1	28	0	1	1	56	0	1	0	2	1	0	1	0	1	0	0	1	1	0	3	0	1	1	0	0	0	0	0	0		universiteit	11	0	0	0	300	296.26	301.6	301.82	0	0	0	avoidant personality disorder	6	0	0	0
523	2	1	26	0	1	0	21	1	0	0	2	1	2	1	0	1	0	0	1	1	0	1	0	1	1	0	0	0	0	0	0	5	havo	8	0	0	0	299	296.22	301.4	301.9	0	0	0	Persoonlijkheids disorder NAO	6	0	1	0
524	1	1	17	0	1	1	43	0	1	0	2	1	0	1	0	1	0	0	1	1	0	6	1	1	0	1	0	0	1	0	1		geen	0	0	0	0	298.9	2262.81	301.82	0	0	0	0	Dissociatieve disorder NAO	0	1	0	0
525	1	1	26	0	1	1	49	0	1	0	2	1	1	1	0	1	0	0	1	1	1	1	0	1	1	0	0	0	0	0	0	5	Middelbaarberoepsonderwijs (MBO) 3- 4-jarig	7	0	0	0	311	300.02	301.82	0	0	0	0	Depressieve disorder:recidiverend, ernstig zonder psychotische kenmerken	3	3	0	0
526	1	1	19	0	1	1	45	0	1	0	2	1	0	1	0	1	0	0	1	1	0	1	1	1	0	1	0	0	0	0	0	4	mavo havo?	8	0	0	0	303.9	304	301.82	301.83	0	0	0	Persoonlijkheids disorder NAO	6	0	0	0
527	2	1	15	0	1	1	48	0	1	0	2	1	0	1	0	1	0	0	1	1	0	3	1	1	0	0	1	1	1	1	0		mbo?	4	1	0	0	296.32	0	301.6	301.9	0	0	0	avoidant personality disorder	6	0	0	0
528	2	1	20	0	1	0	26	1	0	0	2	1	0	1	0	1	0	0	1	1	0	2	0	1	1	0	0	0	0	0	0		mbo4	7	0	0	0	296.3	2262.81	301.83	0	0	0	0	Depressieve disorder NAO	3	3	0	0
529	2	1	23	0	1	1	37	0	1	0	2	1	1	1	0	1	0	0	1	1	1	3	0	1	1	0	0	0	0	0	0	4	mavo	6	0	0	0	296.32	300.02	301.6	0	0	0	0	Depressieve disorder:recidiverende, matig	3	3	0	0
531	2	1	20	0	1	0	35	1	0	0	2	1	0	1	0	1	0	0	1	1	0	6	0	1	1	0	0	0	1	0	0	4	mbo	4	1	0	0	296.89		301.9		0	0	0	Persoonlijkheids disorder NAO	6	0	0	0
533	2	1	20	0	1	0	34	1	0	0	2	1	0	1	0	1	0	0	1	1	0	1	0	1	1	0	0	0	0	0	0		vmbo en marine	7	0	0	0	298.9	305.2	2271.09	0	0	0	0	Psychotic disorder NAO	2	5	0	0
534	1	1	15	0	1	1	43	0	1	0	2	1	0	1	0	1	0	0	1	1	0	99	1	1	0	0	1	1	1	#NULL!	5		basisschool	1	0	0	0	298.9	304.4	799.9	0	0	0	0	Psychotic disorder NAO	2	5	0	0
536	1	1	14	1	1	1	43	0	1	0	2	1	0	1	0	1	0	0	1	1	0	3	1	1	0	0	1	1	9	1	1	0	middelbare school	99	99	99	99	295.3	304.3	2271.09	0	0	0	0	schizophrenia:Paranoïde type	2	6	0	0
537	1	1	17	1	1	1	37	0	1	0	2	1	0	1	0	1	0	0	1	1	0	1	1	1	0	1	0	0	9	1	1	0	school tot 27 voor de universiteit	99	99	1	1	298.9	0	799.9	0	0	0	0	Psychotische disorder	2	5	0	0
538	1	1	16	0	1	0	35	1	0	0	2	1	1	1	0	1	0	0	1	1	0	1	1	1	0	1	0	0	1	0	0		mbo	4	1	0	0	298.9	314	317	0	0	0	0	Psychotic disorder NAO	2	5	1	0
539	1	1	20	0	1	1	54	0	1	0	2	1	0	1	0	1	0	0	1	1	0	1	0	1	1	0	0	0	1	0	0		vmbo kader	4	0	0	0	298.9	0	317	0	0	0	0	Psychotische disorder	2	5	0	0
541	1	1	18	0	1	1	50	0	1	0	2	1	2	1	0	1	0	0	1	1	0	6	1	1	0	1	0	0	1	0	0	4	mbo	4	1	0	0	296.56	0	799.9	0	0	0	0	Bipolaire-I- disorder:laatste episode manisch, ernstig met psychotische kenmerken	3	4	0	0
542	2	1	21	0	1	1	38	0	1	0	2	1	2	1	0	1	0	0	1	1	0	1	0	1	1	0	0	0	0	1	0		mbo/hbo certificaten	7	0	0	0	309.81	292.12	301.83	0	0	0	0	Borderline personality disorder	6	0	0	0
543	1	1	7	0	1	1	49	0	1	0	2	1	2	1	0	1	0	0	1	1	0	1	1	1	0	0	1	1	1	0	0		basisschool	1	0	0	0	312.3	309.81	301.9	0	0	0	0	Psychotische disorder door een middel:alcohol, met wanen	2	5	0	0
544	2	1	19	0	1	2	62	0	0	1	2	1	0	1	0	1	0	0	1	1	0	99	1	1	0	1	0	0	1	#NULL!	5		praktijkschool mavo	4	0	0	0	296.8	2261.1	301.9	0	0	0	0	Bipol.I st. mst rct.epi.man.ern.m.p	3	4	0	0
546	1	1	16	1	1	1	41	0	1	0	2	1	0	1	0	1	0	0	1	1	0	1	1	1	0	1	0	0	0	1	0		hts	10	0	0	0	298.9	305.2	2271.09	0	0	0	0	Psychotic disorder NAO	2	5	0	0
547	1	1	25	0	1	0	23	1	0	0	2	1	0	1	0	1	0	0	1	1	0	1	0	1	1	0	0	0	0	0	0	6	universitair bachelor	10	0	0	0	296.32	299	2271.09	0	0	0	0	Depressieve disorder:recidiverend- matig	3	3	1	0
548	1	1	4	1	1	1	57	0	1	0	2	1	0	1	0	1	0	0	1	1	0	1	1	1	0	0	1	1	1	2	2		blo	2	0	99	99	295.9		2262.89		0	0	0	schizophrenia: paranoidtype	2	6	0	0
549	1	1	23	0	1	1	56	0	1	0	2	1	0	1	0	1	0	0	1	1	0	3	0	1	1	0	0	0	0	0	0	4	mts?	7	0	0	0	296.66	0	799.9	0	0	0	0	Bipolaire-I- disorder:laatste episode gemengd, Niet-gespecificeerd	3	4	0	0
551	2	1	14	0	1	1	52	0	1	0	2	1	3	1	0	1	0	0	1	1	0	3	1	1	0	0	1	1	0	0	0	6	havo	8	0	0	0	309.81	291.9	301.83	0	0	0	0	Psychotic disorder NAO	2	5	0	0
552	2	1	20	0	1	1	40	0	1	0	2	1	0	1	0	1	0	0	1	1	0	2	0	1	1	0	0	0	0	0	0		mavo	6	0	0	0	298.9	292.12	799.9	0	0	0	0	Psychotic disorder NAO	2	5	0	0
553	2	1	20	0	1	1	55	0	1	0	2	1	0	1	0	1	0	0	1	1	0	3	0	1	1	0	0	0	1	0	0		lhno	4	0	0	0	295.3	0	799.9	0	0	0	0	schizophrenia:Paranoïde type	2	6	0	0
556	1	1	26	0	1	0	25	1	0	0	2	1	0	1	0	1	0	0	1	1	0	1	0	1	1	0	0	0	0	0	0		mbo3	7	0	0	0	296.32	0	799.9	0	0	0	0	Depressieve disorder:recidiverende episode-matig	3	3	0	0
557	2	1	16	0	1	1	53	0	1	0	2	1	0	1	0	1	0	0	1	1	0	4	1	1	0	1	0	0	1	0	0		leao geen diploma	4	0	0	0	296.22	309.81	301.6	301.83	0	0	0	Depressieve disorder:Recidiverend,ernstig zonder psychotische kenmerken	3	3	0	0
558	1	1	27	0	1	0	25	1	0	0	2	1	0	1	0	1	0	0	1	1	0	1	0	1	1	0	0	0	0	0	0	4	mvbo tl	6	0	0	0	296.36	314.9	301.81	301.82	0	0	0	Stemmings disorder NAO	3	3	1	0
559	1	1	25	0	1	1	45	0	1	0	2	1	0	1	0	1	0	0	1	1	0	1	0	1	1	0	0	0	0	0	0	5	havo	8	0	0	0	296.22		301.82		0	0	0	Depressieve disorder:eenmalige episode, matig	3	3	0	0
560	1	1	25	0	1	1	48	0	1	0	2	1	0	1	0	1	0	0	1	1	0	6	0	1	1	0	0	0	1	0	0	5	mbo	4	1	0	0	296.22	300			0	0	0	Depressieve disorder:eenmalige episode-matig	3	3	0	0
561	1	1	23	0	1	1	39	0	1	0	2	1	0	1	0	1	0	0	1	1	0	3	0	1	1	0	0	0	1	0	0		mbo	4	1	0	0	300.9	2262.81	799.9	0	0	0	0	Niet gespecificeerde psychische disorder (niet-psychotisch)	0	0	0	0
562	2	1	23	0	1	0	28	1	0	0	2	1	0	1	0	1	0	0	1	1	0	1	0	1	1	0	0	0	1	0	0		vmbo	4	1	0	0	296.22	304.3	301.83	0	0	0	0	Depressieve disorder: eenmalige episode-matig	3	3	0	0
563	1	1	22	0	1	0	32	1	0	0	2	1	0	1	0	1	0	0	1	1	0	1	0	1	1	0	0	0	1	0	0	4	mbo	4	1	0	0								Hypochondrie	8	10	0	1
564	2	1	25	0	1	1	38	0	1	0	2	1	1	1	0	1	0	0	1	1	1	1	0	1	1	0	0	0	0	0	0	4	hbo	10	0	0	0	300.4	307.5	301.83	301.82	0	0	0	Borderline personality disorder	6	0	0	0
565	2	1	23	1	1	1	43	0	1	0	2	1	1	1	0	1	0	0	1	0	2	2	0	1	1	0	0	0	0	0	0	4	propedeuse 1e graad docent.	8	0	0	0	296.89	298.9	301.82	301.9	0	0	0	Anxiety disorder NAO	4	2	0	0
566	2	1	22	0	1	1	41	0	1	0	2	1	0	1	0	1	0	0	1	1	0	3	0	1	1	0	0	0	0	0	0	5	havo	8	0	0	0	298.9	300			0	0	0	Psychotic disorder NAO	2	5	0	0
567	1	1	20	0	1	1	49	0	1	0	2	1	2	1	0	1	0	0	1	1	0	3	0	1	1	0	0	0	1	0	0	4	mbo	4	1	0	0	295.7	304.2	2271.09	0	0	0	0	Schizoaffectieve disorder: Bipolair type	2	6	0	0
568	1	1	24	0	1	1	39	0	1	0	2	1	0	1	0	1	0	0	1	1	0	2	0	1	1	0	0	0	0	0	0	4	mts	7	0	0	0	296.23				0	0	0	Depressieve disorder:eenmalige episode-ernstig, zonder psychotische kenmerken	3	3	0	0
569	1	1	14	0	1	1	53	0	1	0	2	1	0	1	0	1	0	0	1	1	0	1	1	1	0	0	1	1	1	2	2		lts	4	0	99	99	294.9	296.9			0	0	0	Cognitieve disorder NAO	10	7	0	0
570	1	1	16	0	1	1	50	0	1	0	2	1	0	1	0	1	0	0	1	1	0	3	1	1	0	1	0	0	1	2	2		ulo niet afgemaakt	1	0	99	99	298.9				0	0	0	Psychische disordersen door een somatische aandoening	2	5	0	0
571	1	1	15	0	1	2	60	0	0	1	2	1	0	1	0	1	0	0	1	1	0	3	1	1	0	0	1	1	1	0	0		lts	4	0	0	0	311				0	0	0	Depressieve disorder NAO	3	3	0	0
572	2	1	27	0	1	1	52	0	1	0	2	1	0	1	0	1	0	0	1	1	0	2	0	1	1	0	0	0	1	2	2		mbo	4	1	99	99	296.32				0	0	0	Dysthyme disorder	3	3	0	0
573	1	1	99	1	1	2	60	0	0	1	2	1	0	1	0	1	0	0	1	1	0	99	99	0	9	9	9	9	9	#NULL!	5		Onbekend	99	99	99	99	296.23	2262.4			0	0	0	Depress. st. eenm.epi. ern.z.psych.	3	3	0	0
574	2	1	18	0	1	0	28	1	0	0	2	1	0	1	0	1	0	0	1	1	0	1	1	1	0	1	0	0	1	1	0		mbo 2	4	0	99	99	296.23				0	0	0	Depressieve disorder:eenmalige episode, ernstig zonder psychotische kenmerken	3	3	0	0
575	1	1	25	0	1	1	36	0	1	0	2	1	0	1	0	1	0	0	1	1	0	2	0	1	1	0	0	0	1	0	0		mbo	4	1	0	0	296.32	300			0	0	0	Depressieve disorder:recidiverend-matig	3	3	0	0
576	1	1	27	0	1	1	45	0	1	0	2	1	0	1	0	1	0	0	1	1	0	2	0	1	1	0	0	0	1	0	0	4	mbo	4	1	0	0	296.34	304.8			0	0	0	Depressieve disorder:eenmalige episode, ernstig met psychotische kenmerken	3	3	0	0
577	1	1	15	1	1	0	21	1	0	0	2	1	0	1	0	1	0	0	1	1	0	1	1	1	0	0	1	1	1	1	1		geen	0	0	0	0	298.9	292.12			0	0	0	Psychotische disorder door een middel:Cannabis, met wanen	2	5	0	0
578	1	1	23	0	1	1	41	0	1	0	2	1	0	1	0	1	0	0	1	1	0	2	0	1	1	0	0	0	1	0	0	4	mbo	4	1	0	0	300.02	296.36	301.9	0	0	0	0	Depressieve disorder:Recidiverend, gedeeltelijk in remissie	3	3	0	0
579	2	1	99	0	1	1	47	0	1	0	2	1	0	1	0	1	0	0	1	1	0	99	99	0	9	9	9	9	9	#NULL!	5		Onbekend	99	99	99	99	295.3	0	2271.09	0	0	0	0	schizophrenia, paranoidtype	2	6	0	0
581	1	1	26	0	1	1	40	0	1	0	2	1	0	1	0	1	0	0	1	1	0	2	0	1	1	0	0	0	0	0	0	5	havo	8	0	0	0	296.24				0	0	0	Depressieve disorder:eenmalige episode, ernstig met psychotische kenmerken	3	3	0	0
582	2	1	21	0	1	1	42	0	1	0	2	1	0	1	0	1	0	0	1	1	0	3	0	1	1	0	0	0	1	0	0	4	lbo	4	0	0	0	296.66	300.01			0	0	0	Stemmings disorder NAO	3	3	0	0
583	2	1	11	1	1	1	43	0	1	0	2	1	0	1	0	1	0	0	1	1	0	3	1	1	0	0	1	1	1	1	1	0	basisschool	1	0	99	99	296.32	309.81	799.9	0	0	0	0	Depressieve disorder:eenmalige episode-gedeeltelijk in remissie	3	3	0	0
584	1	1	24	0	1	0	22	1	0	0	2	1	1	1	0	1	0	0	1	1	1	99	0	1	1	0	0	0	0	#NULL!	5		academisch	11	0	0	0									0	0	0	1
585	1	1	17	0	1	1	48	0	1	0	2	1	0	1	0	1	0	0	1	1	0	6	1	1	0	1	0	0	1	0	1		geen	0	0	0	0	296.32	2261.1	317	0	0	0	0	Depressieve disorder:recidiverend, matig	3	3	0	0
587	1	1	24	0	1	1	53	0	1	0	2	1	1	1	0	1	0	0	1	1	0	2	0	1	1	0	0	0	1	0	0	4	streekschool, schilder Lager beroepsonderwijs, lager vormend onderwijs (LBO/VMBO praktijk)	4	0	0	0	300	0	301.4	0	0	0	0	Anxiety disorder NAO	4	2	0	0
588	2	1	23	0	1	1	49	0	1	0	2	1	0	1	0	1	0	0	1	1	0	3	0	1	1	0	0	0	0	0	0	4	mbo3	7	0	0	0	300.9		301.83		0	0	0	Borderline personality disorder	6	0	0	0
589	1	1	21	0	1	1	39	0	1	0	2	1	0	1	0	1	0	0	1	1	0	3	0	1	1	0	0	0	1	0	0		kmbo	4	0	0	0	296.32				0	0	0	Depressieve disorder:recidiverend-matig	3	3	0	0
590	2	1	22	0	1	1	52	0	1	0	2	1	0	1	0	1	0	0	1	1	0	2	0	1	1	0	0	0	1	0	0		mbo	4	1	0	0	300.9	309.9			0	0	0	Anxiety disorder NAO	4	2	0	0
591	2	1	19	0	1	0	19	1	0	0	2	1	0	1	0	1	0	0	1	1	0	1	1	1	0	1	0	0	1	0	0	4	vmbo	4	1	0	0								Posttraumatische stress disorder:Chronisch	4	11	0	1
592	2	1	21	0	1	2	61	0	0	1	2	1	0	1	0	1	0	0	1	1	0	1	0	1	1	0	0	0	0	0	0	4	mulo 4	6	0	0	0								Depressieve disorder: eenmalige episode-matig	3	3	0	1
593	2	1	21	0	1	0	34	1	0	0	2	1	0	1	0	1	0	0	1	1	0	2	0	1	1	0	0	0	1	0	0		mbo	4	1	0	0	300.9				0	0	0	Niet gespecificeerde psychische disorder (niet-psychotisch)	0	0	0	0
594	1	1	25	0	1	1	43	0	1	0	2	1	0	1	0	1	0	0	1	1	0	1	0	1	1	0	0	0	1	0	0		lbo	4	0	0	0	299	296.32	301.9	0	0	0	0	Personality disorder nao	6	0	1	0
595	1	1	22	0	1	0	23	1	0	0	2	1	2	1	0	1	0	0	1	1	0	1	0	1	1	0	0	0	1	1	0		mbo2	4	0	0	0	299	298.9	2271.09	0	0	0	0	Psychotic disorder NAO	2	5	1	0
596	1	1	23	0	1	0	31	1	0	0	2	1	0	1	0	1	0	0	1	1	0	1	0	1	1	0	0	0	1	0	0	4	mbo	4	1	0	0	298.9	0	799.9	0	0	0	0	Psychotic disorder NAO	2	5	0	0
597	1	1	21	0	1	1	41	0	1	0	2	1	0	1	0	1	0	0	1	1	0	1	0	1	1	0	0	0	0	0	0	5	havo	8	0	0	0	295.9	309.81	301.9	0	0	0	0	schizophrenia: paranoidtype	2	6	0	0
598	1	1	27	0	1	0	26	1	0	0	2	1	0	1	0	1	0	0	1	1	0	1	0	1	1	0	0	0	0	0	0	6	wo	11	0	0	0	296.23	309.81			0	0	0	Depressieve disorder:eenmalige episode, ernstig zonder psychotische kenmerken	3	3	0	0
599	1	1	12	0	1	2	63	0	0	1	2	1	3	1	0	1	0	0	1	1	0	1	1	1	0	0	1	1	1	0	1	0	lto	3	0	99	99	295.9	295.1	2271.09	0	0	0	0	Psychotic disorder NAO	2	5	0	0
600	2	1	21	0	1	1	53	0	1	0	2	1	0	1	0	1	0	0	1	1	0	1	0	1	1	0	0	0	1	0	0	4	mbo	4	1	0	0	298.9	0	2271.09	0	0	0	0	Psychotic disorder NAO	2	5	0	0
601	2	1	20	0	1	1	56	0	1	0	2	1	2	1	0	1	0	0	1	1	0	3	0	1	1	0	0	0	1	0	0	3	lhno huishoudschool	4	0	0	0	304.8	0	301.83	2262.89	0	0	0	Borderline personality disorder	6	0	0	0
602	2	1	25	0	1	1	51	0	1	0	2	1	2	1	0	1	0	0	1	1	0	3	0	1	1	0	0	0	0	0	0	4	mavo	6	0	0	0	296.53	0	2271.09	0	0	0	0	Bipolaire-I- disorder:laatste episode gemengd, Ernstig met psychotische kenmerken	3	4	0	0
603	1	1	21	0	1	0	27	1	0	0	2	1	2	1	0	1	0	0	1	1	0	1	0	1	1	0	0	0	0	0	0	4	mbo/hbo propedeuse	10	0	0	0	295.4	303.9			0	0	0	Psychotic disorder NAO	2	5	0	0
604	1	1	23	0	1	1	45	0	1	0	2	1	0	1	0	1	0	0	1	1	0	1	0	1	1	0	0	0	0	0	0	4	heao	10	0	0	0	297.1	300			0	0	0	Psychotic disorder NAO	2	5	0	0
605	2	1	12	0	1	2	62	0	0	1	2	1	3	1	0	1	0	0	1	1	0	4	1	1	0	0	1	1	1	0	1	0	lagere school	1	0	0	0	296.43	300	317	0	0	0	0	Bipolaire-II- disorder: Hypomaan	3	4	0	0
606	2	1	15	0	1	1	56	0	1	0	2	1	0	1	0	1	0	0	1	1	0	2	1	1	0	0	1	1	0	0	0		mbo 4	7	0	0	0	296.4	293.83	799.9	0	0	0	0	Bipolaire-I- disorder:laatste episode hypomaan	3	4	0	0
607	1	1	23	0	1	1	51	0	1	0	2	1	0	1	0	1	0	0	1	1	0	2	0	1	1	0	0	0	0	0	0		hbo	10	0	0	0								Depressieve disorder:Recidiverend, matig	3	3	0	1
608	2	1	12	0	1	0	33	1	0	0	2	1	0	1	0	1	0	0	1	1	0	1	1	1	0	0	1	1	1	1	0	3	mbo2	4	0	0	0	295.7	0	799.9	0	0	0	0	Schizoaffectieve disorder: Depressieve type	2	6	0	0
609	1	1	23	0	1	2	60	0	0	1	2	1	2	1	0	1	0	0	1	1	0	1	0	1	1	0	0	0	1	#NULL!	5		mbo	4	1	0	0	295.7	298.9	799.9	0	0	0	0	Pychotische disorder NAO	2	5	0	0
610	1	1	9	1	1	0	30	1	0	0	2	1	2	1	0	1	0	0	1	1	0	99	1	1	0	0	1	1	1	#NULL!	5		basisschool	1	0	0	0	298.9	0	2271.09	0	0	0	0	Psychotic disorder NAO	2	5	0	0
612	1	1	17	0	1	1	37	0	1	0	2	1	1	1	0	1	0	0	1	1	0	99	1	1	0	1	0	0	1	#NULL!	5		vbo(voorbereiden beroeps onderwijs	4	1	0	0	295.9	305.2	2271.09	0	0	0	0	schizophrenia, ongedifferent. type	2	6	0	0
613	1	1	14	0	1	2	68	0	0	1	2	1	1	1	0	1	0	0	1	1	0	99	1	1	0	0	1	1	1	#NULL!	5		lagere landbouw school	4	1	0	0	296.8	0	2271.09	0	0	0	0	Bipolaire disorder NAO	3	4	0	0
614	2	1	24	0	1	1	58	0	1	0	2	1	2	1	0	1	0	0	1	1	0	99	0	1	1	0	0	0	0	#NULL!	5		havo	8	0	0	0	295.7	0	2271.09	0	0	0	0	Schizoaffectieve disorder	2	6	0	0
615	2	1	18	0	1	2	60	0	0	1	2	1	0	1	0	1	0	0	1	1	0	99	1	1	0	1	0	0	1	#NULL!	5		kapperdagschool	4	1	0	0	296.3	304.1	301.9	0	0	0	0	Depress. st. eenm.epi. ern.m.psych.	3	3	0	0
616	1	1	99	0	1	2	72	0	0	1	2	1	0	1	0	1	0	0	1	1	0	99	99	0	9	9	9	9	9	#NULL!	5		Onbekend	99	99	99	99	296.8	293.83	2271.09	0	0	0	0	Psychotic disorder NAO	2	5	0	0
617	2	1	99	0	1	1	46	0	1	0	2	1	0	1	0	1	0	0	1	1	0	99	99	0	9	9	9	9	9	#NULL!	5		Onbekend	99	99	99	99	296.44	309.81	2271.09	0	0	0	0	Posttraumatic stress- disorder	4	11	0	0
618	2	1	25	0	1	1	56	0	1	0	2	1	0	1	0	1	0	0	1	1	0	99	0	1	1	0	0	0	1	#NULL!	5		lhno	4	0	0	0	296.4	296.56			0	0	0	Bipol.I st. mst rct.epi.dep.vol.rem	3	4	0	0
619	2	1	99	0	1	2	68	0	0	1	2	1	0	1	0	1	0	0	1	1	0	99	99	0	9	9	9	9	9	#NULL!	5		Onbekend	99	99	99	99	295.9	0	2271.09	0	0	0	0	schizophrenia, ongedifferent. type	2	6	0	0
621	2	1	99	0	1	1	47	0	1	0	2	1	1	1	0	1	0	0	1	1	0	99	99	0	9	9	9	9	9	#NULL!	5		Onbekend	99	99	99	99	295.7	294.9	317	0	0	0	0	Schizoaffectieve disorder	2	6	0	0
622	2	1	20	0	1	1	44	0	1	0	2	1	0	1	0	1	0	0	1	1	0	99	0	1	1	0	0	0	1	#NULL!	5		mbo	4	1	0	0	309.81	2261.2	301.83		0	0	0	Borderline persoonlijkheidsstoorn.	6	11	0	0
623	1	1	21	0	1	1	49	0	1	0	2	1	0	1	0	1	0	0	1	1	0	99	0	1	1	0	0	0	0	#NULL!	5		mavo	6	0	0	0	295.3	0	2271.09	0	0	0	0	schizophrenia, paranoidtype	2	6	0	0
624	1	1	23	0	1	0	31	1	0	0	2	1	0	1	0	1	0	0	1	1	0	99	0	1	1	0	0	0	0	#NULL!	5		hbo propedeuse	10	0	0	0									0	0	0	1
625	1	1	22	0	1	1	47	0	1	0	2	1	0	1	0	1	0	0	1	1	0	99	0	1	1	0	0	0	1	#NULL!	5		leao	4	0	0	0	296.32	300			0	0	0	Depressieve disorder NAO	3	3	0	0
626	2	1	20	0	1	0	20	1	0	0	2	1	0	1	0	1	0	0	1	1	0	99	0	1	1	0	0	0	1	#NULL!	5		vmbo kader niet afgemaakt.	1	0	0	0	311		301.83		0	0	0	Posttraumatische stress disorder(incl.de posttraumatische- stress disorder bij kinderen van 1 ar hü jonger)	4	11	0	0
627	2	1	22	0	1	0	20	1	0	0	2	1	0	1	0	1	0	0	1	1	0	99	0	1	1	0	0	0	0	#NULL!	5		havo	8	0	0	0	2261.2	307.9	301.82	0	0	0	0	Posttraumatische stress disorder(incl.de posttraumatische- stress disorder bij kinderen van 1 ar ay jonger)	4	11	0	1
628	1	1	27	0	1	1	47	0	1	0	2	1	0	1	0	1	0	0	1	1	0	99	0	1	1	0	0	0	0	#NULL!	5		mavo	6	0	0	0	300.4	0	301.9	301.81	0	0	0	Posttraumatische stress disorder(incl.de posttraumatische- stress disorder bij kinderen van 1 ar hu jonger)	4	11	0	0
629	2	1	99	0	1	0	35	1	0	0	2	1	0	1	0	1	0	0	1	1	0	99	99	0	9	9	9	9	9	#NULL!	5		Onbekend	99	99	0	0	298.9				0	0	0	Posttraumatische stress disorder(incl.ld posttraumatische- stress disorder bij kinderen rin 1 ar ci jonger)	4	11	0	0
630	2	1	99	0	1	2	61	0	0	1	2	1	0	1	0	1	0	0	1	1	0	99	99	0	9	9	9	9	1	#NULL!	5		zweminstructrice	4	1	0	0	295.7	0	301.9	0	0	0	0	Posttraumatische stress disorder(incl.de posttraumatische- stress disorder bij kinderen rin 1 ar . jonger)	4	11	0	0
632	1	1	15	0	1	0	27	1	0	0	2	1	0	1	0	1	0	0	1	1	0	99	1	1	0	0	1	1	1	#NULL!	5		nivo 1 roc	4	0	0	0	298.9	305.7	2271.09	0	0	0	0	Posttraumatische stress disorder(incl.de posttraumatische- stress disorder bij kinderen van 1 ar . jonger)	4	11	0	0
634	1	1	99	0	1	1	38	0	1	0	2	1	0	1	0	1	0	0	1	1	0	99	99	0	9	9	9	9	9	#NULL!	5		Onbekend	99	99	0	0	304.2	291.89	301.9	301.82	0	0	0	Posttraumatische stress disorder(incl.de posttraumatische- stress disorder bij kinderen interviewbaar 1 ar er jonger)	4	11	0	0
635	2	1	13	0	1	0	35	1	0	0	2	1	0	1	0	1	0	0	1	1	0	99	1	1	0	0	1	1	1	#NULL!	5		mbo2	4	0	0	0	309.81	296.26	301.82		0	0	0	Posttraumatische stress disorder(incl.de posttraumatische- stress disorder bij kinderen van 1 ar Al jonger)	4	11	0	0
636	1	1	11	1	1	0	35	1	0	0	2	1	0	1	0	1	0	0	1	1	0	99	1	1	0	0	1	1	1	#NULL!	5		vmbo praktijk	4	0	0	0	296.22				0	0	0	Depressieve st. eenm.epi. matig	3	3	0	0
637	1	1	23	0	1	1	38	0	1	0	2	1	0	1	0	1	0	0	1	1	0	99	0	1	1	0	0	0	0	#NULL!	5		hbo+	10	0	0	0	309.81	309.81	301.82		0	0	0	Posttraumatische stress disorder(incl.de posttraumatische- stress disorder bij kinderen van 1 ar K jonger)	4	11	0	0
638	1	1	12	1	1	0	33	1	0	0	2	1	1	1	0	1	0	0	1	1	0	99	1	1	0	0	1	1	9	#NULL!	5		middelbare school	99	99	0	0	296.22	311	301.9		0	0	0	Depressieve st. eenm.epi. matig	3	3	0	0
639	1	1	99	1	1	1	43	0	1	0	2	1	0	1	0	1	0	0	1	1	0	99	99	0	9	9	9	9	9	#NULL!	5		Onbekend	99	99	0	0	298.9				0	0	0	Psychotic disorder NAO	2	5	0	0
640	1	1	26	0	1	1	41	0	1	0	2	1	0	1	0	1	0	0	1	1	0	99	0	1	1	0	0	0	0	#NULL!	5		hbo	10	0	0	0	300.4	0	301.9	301.6	0	0	0	Posttraumatische stress disorder(incl.de posttraumatische- stress disorder bij kinderen van 1 ar me jonger)	4	11	0	0
641	1	1	22	1	1	1	52	0	1	0	2	1	0	1	0	1	0	0	1	1	0	99	0	1	1	0	0	0	1	#NULL!	5		lts	4	0	0	0	298.9	309.81	2271.09	0	0	0	0	Posttraumatische stress disorder(incl. ( posttraumatische- stress disorder bij kinderen van 1 ar ma jonger)	4	11	0	0
642	1	1	99	1	1	1	38	0	1	0	2	1	0	1	0	1	0	0	1	1	0	99	99	0	9	9	9	9	9	#NULL!	5		Onbekend	99	99	0	0	298.9	304.8	301.9	0	0	0	0	Posttraumatische stress disorder(incl.ol posttraumatische- stress disorder bij kinderen rin 1 ar . jonger)	4	11	0	0
643	2	1	21	0	1	0	29	1	0	0	2	1	2	1	0	1	0	0	1	1	0	99	0	1	1	0	0	0	1	#NULL!	5		mbo	4	1	0	0	304.9	309.81	301.83	301.83	0	0	0	Posttraumatische stress disorder(incl.de posttraumatische- stress disorder bij kinderen van 1 ar en jonger)	4	11	0	0
644	2	1	99	0	1	1	58	0	1	0	2	1	0	1	0	1	0	0	1	1	0	99	99	0	9	9	9	9	9	#NULL!	5		Onbekend	99	99	0	0	296.33				0	0	0	Posttraumatische stress disorder(incl.de posttraumatische- stress disorder bij kinderen rin 1 ar t, jonger)	4	11	0	0
646	1	1	25	0	1	1	36	0	1	0	2	1	0	1	0	1	0	0	1	1	0	99	0	1	1	0	0	0	0	#NULL!	5		wo	11	0	0	0	296.89	2261.2			0	0	0	Bipolaire II disorder	3	4	0	0
647	2	1	26	0	1	2	60	0	0	1	2	1	0	1	0	1	0	0	1	1	0	99	0	1	1	0	0	0	0	#NULL!	5		hbo	10	0	0	0	296.3	303.9			0	0	0	Posttraumatische stress disorder(incl.de posttraumatische- stress disorder bij kinderen van 1 ar Ho jonger)	4	11	0	0
648	1	1	28	0	1	1	45	0	1	0	2	1	0	1	0	1	0	0	1	1	0	99	0	1	1	0	0	0	0	#NULL!	5		vwo/hbo propedeuse	10	0	0	0	311	300			0	0	0	Posttraumatische stress disorder(incl.de posttraumatische- stress disorder bij kinderen van 1 ar ll jonger)	4	11	0	0
649	2	1	26	0	1	0	24	1	0	0	2	1	0	1	0	1	0	0	1	1	0	99	0	1	1	0	0	0	1	#NULL!	5		vmbo	4	1	0	0	309.81	296.9			0	0	0	Posttraumatische stress disorder(incl.de posttraumatische- stress disorder bij kinderen van 1 ar ss jonger)	4	11	0	0
650	1	1	13	0	1	1	46	0	1	0	2	1	0	1	0	1	0	0	1	1	0	99	1	1	0	0	1	1	1	#NULL!	5		lts c	4	0	2	2	298.9	311	799.9	0	0	0	0	Posttraumatische stress disorder(incl.de posttraumatische- stress disorder bij kinderen van 2 ar er jonger)	4	11	0	0
651	2	1	20	0	1	0	22	1	0	0	2	1	0	1	0	1	0	0	1	1	0	99	0	1	1	0	0	0	0	#NULL!	5		mbo 4	7	0	2	0	309.81	299	2271.09	0	0	0	0	ADHA	9	9	1	0
652	2	1	25	0	1	0	24	1	0	0	2	1	3	1	0	1	0	0	1	1	0	99	0	1	1	0	0	0	1	#NULL!	5		mbo	4	1	0	0	311	300	301.83	0	0	0	0	Posttraumatische stress disorder(incl.de posttraumatische- stress disorder bij kinderen van 2 ar V jonger)	4	11	0	0
653	1	1	99	0	1	0	27	1	0	0	2	1	0	1	0	1	0	0	1	1	0	99	99	0	9	9	9	9	9	#NULL!	5		Onbekend	99	99	0	0	298.9	299	2271.09	0	0	0	0	Posttraumatische stress disorder(incl.de posttraumatische- stress disorder bij kinderen rin 2 ar gg jonger)	4	11	1	0
654	1	1	17	0	1	1	47	0	1	0	2	1	0	1	0	1	0	0	1	1	0	99	1	1	0	1	0	0	1	#NULL!	5		technische school metaal	4	1	0	0	311	299	2271.09	0	0	0	0	Posttraumatische stress disorder(incl.de posttraumatische- stress disorder bij kinderen van 2 ar oe jonger)	4	11	1	0
655	2	1	15	1	1	0	29	1	0	0	2	1	0	1	0	1	0	0	1	1	0	99	1	1	0	0	1	1	1	#NULL!	5		basisschool	1	0	0	0	298.9	304.3			0	0	0	Posttraumatische stress disorder(incl.de posttraumatische- stress disorder bij kinderen van 2 ar ad jonger)	4	11	0	0
656	1	1	19	0	1	1	37	0	1	0	2	1	0	1	0	1	0	0	1	1	0	99	1	1	0	1	0	0	0	#NULL!	5		mavo	6	0	0	0	295.35	0	2271.09	0	0	0	0	Posttraumatische stress disorder(incl.de posttraumatische- stress disorder bij kinderen van 2 ar ta jonger)	4	11	0	0
657	1	1	24	0	1	0	31	1	0	0	2	1	0	1	0	1	0	0	1	1	0	99	0	1	1	0	0	0	1	#NULL!	5		mbo	4	1	0	0	298.9	304.3			0	0	0	Posttraumatische stress disorder(incl.de posttraumatische- stress disorder bij kinderen van 2 ar -H jonger)	4	11	0	0
659	1	1	18	0	1	0	26	1	0	0	2	1	2	1	0	1	0	0	1	1	0	99	1	1	0	1	0	0	1	#NULL!	5		Basisonderwijs	1	0	0	0	298.9	299			0	0	0	Posttraumatische stress disorder(incl.de posttraumatische- stress disorder bij kinderen van 2 ar Oo jonger)	4	11	1	0
660	1	1	15	0	1	0	22	1	0	0	2	1	1	1	0	1	0	0	1	1	0	99	1	1	0	0	1	1	1	#NULL!	5		mbo 2	4	0	0	0	296.56	304.3	2271.09	0	0	0	0	Posttraumatische stress disorder(incl.de posttraumatische- stress disorder bij kinderen van 2 ar Bu jonger)	4	11	0	0
664	1	1	22	0	1	1	38	0	1	0	2	1	0	1	0	1	0	0	1	1	0	99	0	1	1	0	0	0	1	0	0	4	lts	4	0	0	0	300.9				0	0	0	Posttraumatische stress disorder(incl.de posttraumatische- stress disorder bij kinderen van 2 jaar Ja jonger)	4	11	0	0
665	1	1	23	0	1	1	46	0	1	0	2	1	0	1	0	1	0	0	1	1	0	99	0	1	1	0	0	0	1	#NULL!	5		mbo	4	1	0	0	296.36	2262.2	301.9		0	0	0	Posttraumatische stress disorder(incl.de posttraumatische- stress disorder bij kinderen van 2 ar ak jonger)	4	11	0	0
666	2	1	20	0	1	1	46	0	1	0	2	1	0	1	0	1	0	0	1	1	0	99	0	1	1	0	0	0	0	0	0	6	mts	7	0	0	2	296.36	307.51	301.82		0	0	0	Posttraumatische stress disorder(incl.de posttraumatische- stress disorder bij kinderen van 2 jaar K jonger)	4	11	0	0
667	1	1	12	0	1	1	49	0	1	0	2	1	0	1	0	1	0	0	1	1	0	99	1	1	0	0	1	1	0	#NULL!	0		vwo	9	0	0	0	295.7				0	0	0	Posttraumatische stress disorder(incl.de posttraumatische- stress disorder bij kinderen van 2 ar st jonger)	4	11	0	0
668	1	1	99	0	1	0	35	1	0	0	2	1	2	1	0	1	0	0	1	1	0	99	99	0	9	9	9	9	9	#NULL!	5		Onbekend	99	99	0	0	295.9	305.2	317	0	0	0	0	schizophrenia, ongedifferent. type	2	6	0	0
671	1	1	10	0	1	0	32	1	0	0	2	1	0	1	0	1	0	0	1	1	0	99	1	1	0	0	1	1	1	#NULL!	5		praktijkschool	3	0	0	0	299	300	2262.89	0	0	0	0	Posttraumatische stress disorder(incl.de posttraumatische- stress disorder bij kinderen van 2 ar Kr jonger)	4	11	1	0
674	2	1	99	0	1	1	40	0	1	0	2	1	0	1	0	1	0	0	1	1	0	2	99	0	9	9	9	9	9	0	0		Onbekend	99	99	0	0	2261.2	2262.2	301.9	0	0	0	0	Posttraumatische stress disorder(incl.de posttraumatische- stress disorder bij kinderen interviewbaar 2 jaar Bo jonger)	4	11	0	1
675	1	1	21	0	1	1	50	0	1	0	2	1	1	1	0	1	0	0	1	1	0	99	0	1	1	0	0	0	0	0	0	4	hbo	10	0	0	0	296.36			301.82	0	0	0	Posttraumatische stress disorder(incl.de posttraumatische- stress disorder bij kinderen van 2 jaar eb jonger)	4	11	0	0
676	1	1	18	0	1	0	33	1	0	0	2	1	0	1	0	1	0	0	1	1	0	99	1	1	0	1	0	0	1	0	1	2	geen	0	0	0	0	298.9	314.01			0	0	0	Posttraumatische stress disorder(incl.de posttraumatische- stress disorder bij kinderen van 2 jaar ke jonger)	4	11	1	0
677	1	1	99	0	1	1	46	0	1	0	2	1	0	1	0	1	0	0	1	1	0	99	99	0	9	9	9	9	1	1	1		geen	0	0	0	0	295.3	0	301.6	0	0	0	0	Posttraumatische stress disorder(incl.de posttraumatische- stress disorder bij kinderen interviewbaar 2 neear ba jonger)	4	11	0	0
678	2	1	10	0	1	1	51	0	1	0	2	1	2	1	0	1	0	0	1	1	0	99	1	1	0	0	1	1	1	0	1		lhno	4	0	0	0	295.3	0	2271.09	0	0	0	0	schizophrenia, paranoidtype	2	6	0	0
680	2	1	99	0	1	1	57	0	1	0	2	1	0	1	0	1	0	0	1	1	0	99	99	0	9	9	9	9	9	2	2		Onbekend	99	99	99	99	298.9	296.34			0	0	0	Posttraumatische stress disorder(incl.de posttraumatische- stress disorder bij kinderen rin 2 weet nietar ui jonger)	4	11	0	0
681	2	1	26	0	1	0	24	1	0	0	2	1	0	1	0	1	0	0	1	1	0	99	0	1	1	0	0	0	0	0	0	6	hbo	10	0	0	0	309.81	309.81	301.83		0	0	0	Posttraumatische stress disorder(incl.de posttraumatische- stress disorder bij kinderen van 2 jaar il jonger)	4	11	0	0
682	2	1	26	0	1	0	26	1	0	0	2	1	0	1	0	1	0	0	1	1	0	99	0	1	1	0	0	0	0	0	0	6	wo	11	0	0	0	298.9	300.01			0	0	0	Posttraumatische stress disorder(incl.de posttraumatische- stress disorder bij kinderen van 2 jaar ul jonger)	4	11	0	0
683	2	1	23	0	1	0	26	1	0	0	2	1	0	1	0	1	0	0	1	1	0	99	0	1	1	0	0	0	0	0	0	5	havo	8	0	0	0	309.4	307.5	301.83	301.82	0	0	0	Posttraumatische stress disorder(incl.de posttraumatische- stress disorder bij kinderen van 2 jaar Si jonger)	4	11	0	0
684	2	1	9	0	1	1	37	0	1	0	2	1	0	1	0	1	0	0	1	1	0	99	1	1	0	0	1	1	1	0	0	3	geen	0	0	0	2	298.9	309.81	301.83	2262.89	0	0	0	Posttraumatische stress disorder(incl.de posttraumatische- stress disorder bij kinderen van 2 jaar on jonger)	4	11	0	0
685	1	1	16	0	1	0	22	1	0	0	2	1	0	1	0	1	0	0	1	1	0	99	1	1	0	1	0	0	1	0	0	5	mbo 1	4	0	0	0	312.9	312.9	301.9	0	0	0	0	Posttraumatic stress- disorder	4	11	1	0
686	2	1	14	0	1	1	48	0	1	0	2	1	2	1	0	1	0	0	1	1	0	99	1	1	0	0	1	1	1	0	0		vz assistente]	4	1	0	0	298.9	309.81	301.83	301.83	0	0	0	Posttraumatische stress disorder(incl.de posttraumatische- stress disorder bij kinderen van 2 jaar or jonger)	4	11	0	0
687	2	1	25	0	1	0	21	1	0	0	2	1	0	1	0	1	0	0	1	1	0	99	0	1	1	0	0	0	0	0	0	6	gymnasium	9	0	0	0	300.9		301.83		0	0	0	Posttraumatische stress disorder(incl.de posttraumatische- stress disorder bij kinderen van 2 jaar ke jonger)	4	11	0	0
688	1	1	22	0	1	1	47	0	1	0	2	1	0	1	0	1	0	0	1	1	0	99	0	1	1	0	0	0	1	0	0	6	mbo	4	1	0	0	296.22				0	0	0	Posttraumatische stress disorder(incl.de posttraumatische- stress disorder bij kinderen van 2 jaar en jonger)	4	11	0	0
689	2	1	25	0	1	0	28	1	0	0	2	1	0	1	0	1	0	0	1	1	0	99	0	1	1	0	0	0	1	0	0	4	mbo	4	1	0	0	296.33				0	0	0	Posttraumatische stress disorder(incl.de posttraumatische- stress disorder bij kinderen van 2 jaar ij jonger)	4	11	0	0
690	2	1	19	0	1	0	28	1	0	0	2	1	0	1	0	1	0	0	1	1	0	99	1	1	0	1	0	0	0	0	0	4	mbo4	7	0	0	0	309.81	300.15	301.83	0	0	0	0	Posttraumatische stress disorder(incl.de posttraumatische- stress disorder bij kinderen van 2 jaar Bo jonger)	4	11	0	0
691	2	1	26	0	1	0	26	1	0	0	2	1	2	1	0	1	0	0	1	1	0	99	0	1	1	0	0	0	0	0	0	5	universiteit	11	0	0	0	299		301.4		0	0	0	Posttraumatische stress disorder(incl.de posttraumatische- stress disorder bij kinderen van 2 jaar Ko jonger)	4	11	1	0
693	2	1	23	0	1	1	51	0	1	0	2	1	0	1	0	1	0	0	1	1	0	99	0	1	1	0	0	0	1	0	0	5	mbo	4	1	0	0	296.26		301.9		0	0	0	Depress. st. eenm.epi. vol.remissie	3	3	0	0
694	2	1	19	0	1	0	28	1	0	0	2	1	0	1	0	1	0	0	1	1	0	99	1	1	0	1	0	0	0	0	0	5	mbo4	7	0	0	0	296.43	304.3			0	0	0	Posttraumatische stress disorder(incl.de posttraumatische- stress disorder bij kinderen van 2 jaar Ja jonger)	4	11	0	0
695	2	1	99	1	1	1	48	0	1	0	2	1	0	1	0	1	0	0	1	1	0	99	99	0	9	9	9	9	9	1	1		Onbekend	99	99	0	0								Posttraumatische stress disorder(incl.it posttraumatische- stress disorder bij kinderen interviewbaar 2 neear er jonger)	4	11	0	1
696	2	1	22	0	1	1	41	0	1	0	2	1	0	1	0	1	0	0	1	1	0	99	0	1	1	0	0	0	0	0	0		vig	7	0	0	0								Posttraumatische stress disorder(incl.de posttraumatische- stress disorder bij kinderen van 2 jaar Br jonger)	4	11	0	1
697	2	1	25	0	1	0	33	1	0	0	2	1	0	1	0	1	0	0	1	1	0	99	0	1	1	0	0	0	0	0	0	4	mavo	6	0	0	0								Posttraumatische stress disorder(incl.de posttraumatische- stress disorder bij kinderen van 2 jaar de jonger)	4	11	0	1
698	1	1	22	0	1	1	44	0	1	0	2	1	0	1	0	1	0	0	1	1	0	99	0	1	1	0	0	0	1	0	0	2	mbo	4	1	0	0	298.9	303.9	2271.09	0	0	0	0	Posttraumatische stress disorder(incl.de posttraumatische- stress disorder bij kinderen van 2 jaar Ol jonger)	4	11	0	0
699	1	1	23	0	1	1	49	0	1	0	2	1	2	1	0	1	0	0	1	1	0	99	0	1	1	0	0	0	0	0	0	4	mavo	6	0	0	0	295.7	298.9	301.9	0	0	0	0	Posttraumatische stress disorder(incl.de posttraumatische- stress disorder bij kinderen van 2 jaar rs jonger)	4	11	0	0
701	1	1	24	0	1	0	24	1	0	0	2	1	0	1	0	1	0	0	1	1	0	1	0	1	1	0	0	0	0	0	0	6	wo bachelor	10	0	0	0	299	296.32			0	0	0	Autismespectrum disorder	9	9	1	0
702	2	1	22	0	1	0	22	1	0	0	2	1	0	1	0	1	0	0	1	1	0	1	0	1	1	0	0	0	1	0	0	4	mbo2	4	0	0	0	309.81	293.89			0	0	0	Depressieve disorder: recidiverende episode - matig	3	3	0	0
704	2	1	17	0	1	0	29	1	0	0	2	1	0	1	0	1	0	0	1	1	0	2	1	1	0	1	0	0	1	0	0	4	vmbo basis	4	0	0	0	309.81	309.4	301.83		0	0	0	Depressieve disorder: eenmalige episode - matig	3	3	0	0
705	1	1	25	0	1	1	46	0	1	0	2	1	0	1	0	1	0	0	1	1	0	1	0	1	1	0	0	0	0	0	0	6	heao-el	10	0	0	0								Depressieve disorder: recidiverende episode - licht	3	3	0	1
706	2	1	25	0	1	1	50	0	1	0	2	1	0	1	0	1	0	0	1	1	0	3	0	1	1	0	0	0	1	0	0	8	mbo	4	1	0	0	296.22	309.81			0	0	0	Depressieve disorder: eenmalige episode - matig	3	3	0	0
707	1	1	14	0	1	1	51	0	1	0	2	1	0	1	0	1	0	0	1	1	0	99	1	1	0	0	1	1	0	0	0	4	hts	10	0	0	0	296.4	291.9	301.83	0	0	0	0	Posttraumatische stress disorder(incl.de posttraumatische- stress disorder bij kinderen van 2 jaar Ro jonger)	4	11	0	0
708	2	1	5	0	1	1	38	0	1	0	2	1	1	1	0	1	0	0	1	0	2	99	1	1	0	0	1	1	0	0	0		hbo	10	0	0	0	295.9	304.3	2271.09	0	0	0	0	schizophrenia, ongedifferent. type	2	6	0	0
709	1	1	22	0	1	1	53	0	1	0	2	1	0	1	0	1	0	0	1	1	0	99	0	1	1	0	0	0	0	0	0		havo	8	0	0	0	298.9	291.9	799.9	0	0	0	0	Bipol.I st. mst rct.epi.depr.n.gesp	3	4	0	0
710	1	1	19	0	1	1	47	0	1	0	2	1	2	1	0	1	0	0	1	1	0	99	1	1	0	1	0	0	1	0	0		mbo	4	1	0	0	303.9	303.9	301.83		0	0	0	Posttraumatische stress disorder(incl.de posttraumatische- stress disorder bij kinderen van 2 jaar ge jonger)	4	11	0	0
711	1	1	21	0	1	1	37	0	1	0	2	1	0	1	0	1	0	0	1	1	0	99	0	1	1	0	0	0	1	0	0	7	mbo	4	1	0	0	311				0	0	0	Posttraumatische stress disorder(incl.de posttraumatische- stress disorder bij kinderen van 2 jaar ul jonger)	4	11	0	0
712	2	1	25	0	1	1	46	0	1	0	2	1	0	1	0	1	0	0	1	1	0	99	0	1	1	0	0	0	0	0	0	4	mavo	6	0	0	0	300.9				0	0	0	Posttraumatische stress disorder(incl.de posttraumatische- stress disorder bij kinderen van 2 jaar er jonger)	4	11	0	0
713	1	1	17	0	1	0	33	1	0	0	2	1	2	1	0	1	0	0	1	1	0	99	1	1	0	1	0	0	0	0	0	6	havo	8	0	0	0	295.7	296.9	2271.09	0	0	0	0	Posttraumatische stress disorder(incl.de posttraumatische- stress disorder bij kinderen van 2 jaar ei jonger)	4	11	0	0
715	1	1	19	0	1	1	37	0	1	0	2	1	0	1	0	1	0	0	1	1	0	99	1	1	0	1	0	0	0	0	0	5	mavo d	6	0	0	0	295.9	303.9	2271.09	0	0	0	0	Posttraumatische stress disorder(incl.de posttraumatische- stress disorder bij kinderen van 2 jaar Oz jonger)	4	11	0	0
716	1	1	99	1	1	1	50	0	1	0	2	1	0	1	0	1	0	0	1	1	0	99	99	0	9	9	9	9	9	1	1	0	Onbekend	99	99	99	99	295.7	295.7	2271.09	0	0	0	0	Posttraumatische stress disorder(incl.de posttraumatische- stress disorder bij kinderen rin 2 neear Ma jonger)	4	11	0	0
717	2	1	19	0	1	1	49	0	1	0	2	1	2	1	0	1	0	0	1	1	0	99	1	1	0	1	0	0	0	0	0		hbo	10	0	0	0	300.12	303.9	301.81		0	0	0	Posttraumatische stress disorder(incl.de posttraumatische- stress disorder bij kinderen van 2 jaar Le jonger)	4	11	0	0
718	1	1	99	1	1	0	23	1	0	0	2	1	0	1	0	1	0	0	1	1	0	99	99	0	9	9	9	9	9	1	1	0	Onbekend	99	99	99	99	295.9	305.2			0	0	0	Posttraumatische stress disorder(incl.ri posttraumatische- stress disorder bij kinderen Nederlands 2 neear ti jonger)	4	11	0	0
720	2	1	24	0	1	0	33	1	0	0	2	1	0	1	0	1	0	0	1	1	0	99	0	1	1	0	0	0	0	0	0		vwo	9	0	0	0	299	300.3	301.9	301.4	0	0	0	Obsessieve-compulsieve disorder	4	2	1	0
722	1	1	21	0	1	0	29	1	0	0	2	1	0	1	0	1	0	0	1	1	0	99	0	1	1	0	0	0	1	0	0		vmbo	4	1	1	0	314.01	2261.1	301.81		0	0	0	Posttraumatische stress disorder(incl.de posttraumatische- stress disorder bij kinderen van 2 jaar rb jonger)	4	11	1	0
723	2	1	28	0	1	0	25	1	0	0	2	1	0	1	0	1	0	0	1	1	0	99	0	1	1	0	0	0	0	0	0	6	havo/mbo4	8	0	0	0	296.32	309.9			0	0	0	Posttraumatische stress disorder(incl.de posttraumatische- stress disorder bij kinderen van 2 jaar nz jonger)	4	11	0	0
724	2	1	23	0	1	0	23	1	0	0	2	1	0	1	0	1	0	0	1	1	0	99	0	1	1	0	0	0	0	0	0	4	mbo4	7	0	0	0	300.4	300	301.83	301.82	0	0	0	Posttraumatische stress disorder(incl.de posttraumatische- stress disorder bij kinderen van 2 jaar am jonger)	4	11	0	0
725	1	1	22	0	1	0	26	1	0	0	2	1	0	1	0	1	0	0	1	1	0	99	0	1	1	0	0	0	0	0	0		mbo3	7	0	0	0	311		301.81		0	0	0	Posttraumatische stress disorder(incl.de posttraumatische- stress disorder bij kinderen van 2 jaar Be jonger)	4	11	0	0
726	2	1	23	0	1	1	43	0	1	0	2	1	0	1	0	1	0	0	1	1	0	99	0	1	1	0	0	0	0	0	0		mbo4	7	0	0	0	296.22	300.3	301.9	301	0	0	0	Posttraumatische stress disorder(incl.de posttraumatische- stress disorder bij kinderen van 2 jaar Sc jonger)	4	11	0	0
727	2	1	20	0	1	0	21	1	0	0	2	1	0	1	0	1	0	0	1	1	0	99	0	1	1	0	0	0	1	0	0		vmbo-bb	4	0	0	0	300.4	2261.2	301.83		0	0	0	Posttraumatische stress disorder(incl.de posttraumatische- stress disorder bij kinderen van 2 jaar an jonger)	4	11	0	0
728	2	1	23	0	1	1	51	0	1	0	2	1	2	1	0	1	0	0	1	1	0	99	0	1	1	0	0	0	1	0	0	6	intas	4	0	0	0	300	311			0	0	0	Posttraumatische stress disorder(incl.de posttraumatische- stress disorder bij kinderen van 2 jaar ha jonger)	4	11	0	0
729	2	1	27	0	1	0	21	1	0	0	2	1	0	1	0	1	0	0	1	1	0	99	0	1	1	0	0	0	0	0	0	7	vwo	9	0	0	0	296.33	309.81			0	0	0	Posttraumatische stress disorder(incl.de posttraumatische- stress disorder bij kinderen van 2 jaar Vo jonger)	4	11	0	0
730	1	1	23	0	1	0	30	1	0	0	2	1	2	1	0	1	0	0	1	1	0	1	0	1	1	0	0	0	1	0	0	4	mbo 2	4	0	0	0	298.9	292.9	2271.09	0	0	0	0	Ongespecificeerde schizophreniaspectrum -of andere psychotische disorder	2	5	0	0
731	2	1	9	0	1	1	38	0	1	0	2	1	3	1	0	1	0	0	1	1	0	1	1	1	0	0	1	1	1	0	0		vmbo	4	1	0	0	295.7	0	317	2262.89	0	0	0	Schizoaffectieve disorder:bipolaire type	2	6	0	0
732	1	1	13	0	1	0	33	1	0	0	2	1	2	1	0	1	0	0	1	1	0	1	1	1	0	0	1	1	1	0	1		mavo niet afgemaakt	1	0	2	0	295.9	299	301.9	0	0	0	0	schizophrenia	2	6	1	0
733	2	1	12	0	1	0	22	1	0	0	2	1	0	1	0	1	0	0	1	1	0	1	1	1	0	0	1	1	1	0	0	5	basisschool	1	0	0	0	312.9	309.81	301.83	2262.89	0	0	0	Posttraumatische stress disorder(incl. de posttraumatische- stress disorder bij kinderen van 6 jaar en jonger)	4	11	1	0
734	1	1	17	0	1	1	48	0	1	0	2	1	1	1	0	1	0	0	1	1	0	6	1	1	0	1	0	0	1	0	0	5	technische school en middelbar	4	1	0	0	296.8	0	2271.09	317	0	0	0	Bipolaire I disorder: actuele of meest recente episode depressief-ongespecificeerd	3	4	0	0
735	1	1	28	0	1	0	34	1	0	0	2	1	0	1	0	1	0	0	1	1	0	2	0	1	1	0	0	0	0	0	0		universiteit	11	0	0	0	298.9				0	0	0	Andere gespecificeerdeschizophreniaspectrum- of andere psychotische disorder	2	5	0	0
736	1	1	24	0	1	1	48	0	1	0	2	1	0	1	0	1	0	0	1	1	0	1	0	1	1	0	0	0	0	0	0	6	meao	7	0	0	0	295.9				0	0	0	schizophrenia	2	6	0	0
737	1	1	27	0	1	2	60	0	0	1	2	1	0	1	0	1	0	0	1	1	0	2	0	1	1	0	0	0	9	0	0	7	middelbare school	99	99	0	0	296.23				0	0	0	Depressieve disorder: eenmalige episode- Met psychotische kenmerken	3	3	0	0
738	2	1	17	0	1	1	43	0	1	0	2	1	3	1	0	1	0	0	1	1	0	1	1	1	0	1	0	0	1	0	0		lbo	4	0	0	0	298.9	299			0	0	0	Ongespecificeerde schizophreniaspectrum- of andere psychotische disorder	2	5	1	0
739	1	1	20	0	1	0	31	1	0	0	2	1	2	1	0	1	0	0	1	1	0	1	0	1	1	0	0	0	0	0	0	4	hbo	10	0	0	0	298.9	300	2271.09	0	0	0	0	Andere gespecificeerdeschizophreniaspectrum- of andere psychotische disorder	2	5	0	0
740	2	1	15	0	1	2	62	0	0	1	2	1	0	1	0	1	0	0	1	1	0	99	1	1	0	0	1	1	1	0	0		middelbare beroepsopleiding kv/jv	4	1	0	0	291.9	300.9	301.9	0	0	0	0	Dysthyme disorder	3	3	0	0
741	2	1	16	0	1	1	55	0	1	0	2	1	0	1	0	1	0	0	1	1	0	99	1	1	0	1	0	0	1	0	0	6	huishoudschool	4	0	0	0									0	0	0	1
742	1	1	23	0	1	1	57	0	1	0	2	1	0	1	0	1	0	0	1	1	0	99	0	1	1	0	0	0	1	0	0		lts	4	0	0	0	293.82				0	0	0	Psychot. disorder d. somat. aandoening	2	5	0	0
743	1	1	23	0	1	1	50	0	1	0	2	1	0	1	0	1	0	0	1	1	0	3	0	1	1	0	0	0	0	0	0		mbo nivo 3	7	0	0	0	296.23	303.9			0	0	0	Depressieve disorder: eenmalige episode - ernstig	3	3	0	0
745	2	1	16	0	1	1	48	0	1	0	2	1	0	1	0	1	0	0	1	1	0	99	1	1	0	1	0	0	1	0	0		basisschool	1	0	0	0	298.9	300	301.82	0	0	0	0	Andere gespecificeerde schizophreniaspectrum- of andere psychotische disorder	2	5	0	0
746	2	1	23	0	1	0	24	1	0	0	2	1	0	1	0	1	0	0	1	1	0	99	0	1	1	0	0	0	0	0	0		mbo 4	7	0	0	0	298.9	0	799.9	0	0	0	0	Andere gespecificeerde schizophreniaspectrum- of andere psychotische disorder	2	5	0	0
747	2	1	11	0	1	0	29	1	0	0	2	1	0	1	0	1	0	0	1	1	0	99	1	1	0	0	1	1	1	0	0		mbo nivo 2	4	0	0	0	298.9	292.9	799.9	0	0	0	0	Ongespecificeerde schizophreniaspectrum- of andere psychotische disorder	2	5	0	0
748	1	1	11	1	3	0	35	1	0	0	3	1	0	2	0	0	0	1	0	1	0	99	1	1	0	0	1	1	1	1	1	0	MBO	4	1	0	0	297.1	0	799.9	0	0	0	0	Waan disorder:gemengde type	2	6	0	0
749	1	1	22	0	3	0	24	1	0	0	3	1	0	2	0	0	0	1	0	1	0	99	0	1	1	0	0	0	0	1	0	4	VMBO TL	7	0	0	0	299.8	304.8	799.9	0	0	0	0	Asperger	9	9	1	0
751	1	1	20	0	3	0	33	1	0	0	3	1	0	2	0	0	0	1	0	1	0	99	0	1	1	0	0	0	1	0	0		algemeen militaire opleiding	4	1	0	0	295.3	309.81	301.7	0	0	0	0	schizophrenia	2	6	0	0
752	1	1	5	0	3	0	30	1	0	0	3	1	0	2	0	0	0	1	0	1	0	99	1	1	0	0	1	1	1	1	1	0	ZMLK	2	0	0	0	295.9	299	2271.09	0	0	0	0	schizophrenia	2	6	1	0
753	1	1	18	0	3	0	31	1	0	0	3	1	0	2	0	0	0	1	0	1	0	99	1	1	0	1	0	0	1	0	0	3	basisschool	1	0	0	0	295.9	304.3	2271.09	0	0	0	0	schizophrenia	2	6	0	0
755	2	1	9	0	3	1	42	0	1	0	3	1	0	2	0	0	0	1	0	1	0	99	1	1	0	0	1	1	1	#NULL!	5		geen	0	0	0	0	298.9	303.9	301.83	317	0	0	0	Psychotic disorder NAO	2	5	0	0
756	1	1	19	0	3	1	40	0	1	0	3	1	0	2	0	0	0	1	0	1	0	99	1	1	0	1	0	0	1	0	0	2	LBO	4	0	0	0	312.3	309.81	799.9	0	0	0	0	Posttraumatische stress disorder(incl. de posttraumatische-stress disorder bij kinderen van 6jr en jonger): met uitges	4	11	0	0
758	1	1	19	0	3	0	22	1	0	0	3	1	4	2	0	0	0	1	0	1	0	99	1	1	0	1	0	0	1	0	0	3	MBO niveau 2	4	0	0	0	296.56	304.3	2271.09	0	0	0	0	Bipolaire-1- disorder:actuele of meest recente episode manisch- Volledig in remissie	3	4	0	0
759	2	1	11	1	3	0	34	1	0	0	3	1	0	2	0	0	0	1	0	1	0	99	1	1	0	0	1	1	0	#NULL!	5		lyceum in Turkije	8	0	1	1	295.1	0	2271.09	0	0	0	0	Psychotic disorder NAO	2	5	0	0
760	1	1	12	1	3	1	58	0	1	0	3	1	0	2	0	0	0	1	0	1	0	99	1	1	0	0	1	1	0	#NULL!	5		HAVO	8	0	1	1								Aan een middel gebonden disordersen	1	8	0	1
762	1	1	16	0	3	0	31	1	0	0	3	1	2	2	0	0	0	1	0	1	0	99	1	1	0	1	0	0	1	#NULL!	5		MAVO	5	1	0	0	304.4	298.9	2271.09	0	0	0	0	schizophrenia, paranoidtype	2	6	0	0
763	1	1	14	0	3	0	33	1	0	0	3	1	0	2	0	0	0	1	0	1	0	99	1	1	0	0	1	1	1	0	1	0	basisschool	1	0	0	0	298.9	298.9	2262.89	0	0	0	0	disorder in het gebruik van een amfetamineachtig middel:matig, ernstig	1	8	0	0
764	2	1	22	0	3	1	43	0	1	0	3	1	0	2	0	0	0	1	0	1	0	99	0	1	1	0	0	0	0	0	0	5	HAVO	8	0	0	0	295.3	300	2271.09	0	0	0	0	schizophrenia	2	6	0	0
765	1	1	18	0	3	0	31	1	0	0	3	1	0	2	0	0	0	1	0	1	0	99	1	1	0	1	0	0	0	0	0	4	MAVO DHAVO	6	0	0	0	295.9	305	799.9	0	0	0	0	schizophrenia	2	6	0	0
766	1	1	6	1	3	1	39	0	1	0	3	1	0	2	0	0	0	1	0	1	0	99	1	1	0	0	1	1	1	#NULL!	5		geen	0	0	1	1	295.1	304.8	2271.09	0	0	0	0	schizophrenia, gedesorganiseerd type	2	6	0	0
767	2	1	7	0	3	1	38	0	1	0	3	1	0	2	0	0	0	1	0	1	0	99	1	1	0	0	1	1	1	#NULL!	5		huishoudschool	4	0	0	0	295.1	312.3	2271.09	0	0	0	0	schizophrenia, gedesorganiseerd type	2	6	0	0
769	2	1	16	0	3	1	54	0	1	0	3	1	2	2	0	0	0	1	0	1	0	99	1	1	0	1	0	0	0	#NULL!	5		HAVO	8	0	0	0	295.9	0	301.6	0	0	0	0	schizophrenia, ongedifferent. type	2	6	0	0
770	2	1	15	0	3	1	48	0	1	0	3	1	2	2	0	0	0	1	0	1	0	99	1	1	0	0	1	1	1	0	0	3	verzorgingsassistente	4	1	0	0	296.4	2261.2	317	0	0	0	0	Bipolaire-1- disorder:actuele of meest recente episode manisch-Ongespecificeerd	3	4	0	0
771	1	1	99	0	3	1	58	0	1	0	3	1	0	2	0	0	0	1	0	1	0	99	99	0	9	9	9	9	9	#NULL!	5		niet te vinden in dossier	99	99	99	99	2271.09	0	301.4	0	0	0	0	Obsessieve-compulsieve persoonl.st.	4	2	0	1
773	1	1	10	1	3	1	48	0	1	0	3	1	0	2	0	0	0	1	0	1	0	99	1	1	0	0	1	1	1	2	2		technisch	4	1	0	0	295.9	303.9	2271.09	0	0	0	0	schizophrenia	2	6	0	0
775	1	1	22	0	3	0	29	1	0	0	3	1	0	2	0	0	0	1	0	1	0	99	0	1	1	0	0	0	0	0	0	5	HAVO	8	0	0	0	295.7	304.8	301.7	0	0	0	0	Schizoaffectieve disorder: Bipolait type	2	6	0	0
776	1	1	17	0	3	1	47	0	1	0	3	1	0	2	0	0	0	1	0	1	0	99	1	1	0	1	0	0	1	0	0	4	MAVO	5	1	0	0	295.9	303.9	2271.09	0	0	0	0	schizophrenia	2	6	0	0
777	2	1	15	0	3	0	23	1	0	0	3	1	0	2	0	0	0	1	0	1	0	99	1	1	0	0	1	1	1	0	0	5	basisschool	1	0	0	0	295.3	304.8	799.9	0	0	0	0	schizophrenia	2	6	0	0
778	1	1	20	1	3	1	57	0	1	0	3	1	0	2	0	0	0	1	0	1	0	99	0	1	1	0	0	0	1	#NULL!	5		ITO	3	0	0	0	298.9	304.3	317		0	0	0	Psychotic disorder NAO	2	5	0	0
779	1	1	99	0	3	2	67	0	0	1	3	1	0	2	0	0	0	1	0	1	0	99	99	0	9	9	9	9	1	0	0		Basisschool	1	0	0	0	300.02	312.3	301.9	0	0	0	0	Andere gespecificeerde persoonlijkheids disorder	6	2	0	0
780	1	1	20	0	3	0	28	1	0	0	3	1	0	2	0	0	0	1	0	1	0	99	0	1	1	0	0	0	1	0	0	4	VMBO logistiek	4	1	0	0	295.3	304.8	799.9	0	0	0	0	schizophrenia	2	6	0	0
781	1	1	18	0	3	1	52	0	1	0	3	1	0	2	0	0	0	1	0	1	0	99	1	1	0	1	0	0	0	0	0	4	HAVO	8	0	0	0	295.3	0	2271.09	0	0	0	0	schizophrenia	2	6	0	0
782	2	1	16	0	3	0	20	1	0	0	3	1	1	2	0	0	0	1	0	1	0	99	1	1	0	1	0	0	1	0	1	0	basisschool	1	0	0	0	304.9	303	301.83	0	0	0	0	Autismespectrum disorder	9	9	0	0
783	1	1	14	0	3	0	25	1	0	0	3	1	0	2	0	0	0	1	0	1	0	99	1	1	0	0	1	1	1	0	0	2	kaderberoepsgerichte leerweg kok	4	0	0	0	312.9	305.6	799.9	0	0	0	0	Andere gespecificeerde,disruptieve, impulsbeheersings-of andere gedrags disorder	1	8	1	0
784	1	1	14	0	3	0	26	1	0	0	3	1	0	2	0	0	0	1	0	1	0	99	1	1	0	0	1	1	1	0	0	4	VMBO ader	4	0	0	0	295.3	304.8	799.9	0	0	0	0	schizophrenia: paranoidtype	2	6	0	0
785	2	1	6	0	3	1	57	0	1	0	3	1	0	2	0	0	0	1	0	1	0	99	1	1	0	0	1	1	1	0	0	4	basisschool	1	0	0	0	300.15	300.23	301.9	301.82	0	0	0	Andere gespecificeerde dissociatieve disorder	4	2	0	0
786	1	1	18	0	3	1	40	0	1	0	3	1	1	2	0	0	0	1	0	1	0	99	1	1	0	1	0	0	1	#NULL!	5		praktijkopleiding metaal	4	1	0	0	299	304.8	2271.09	0	0	0	0	Autistische disorder	9	9	1	0
787	2	1	18	0	3	0	30	1	0	0	3	1	0	2	0	0	0	1	0	1	0	99	1	1	0	1	0	0	1	0	0	4	VMBO	4	1	0	0	295.9	298.9	2262.89	2262.89	0	0	0	Psychotische disorder door een ander (of onbekend) middel	2	5	0	0
788	1	1	11	0	3	1	36	0	1	0	3	1	0	2	0	0	0	1	0	1	0	99	1	1	0	0	1	1	1	0	0	4	detailhandel	4	1	0	0	295.3	304.8	317	0	0	0	0	schizophrenia: paranoidtype	2	6	0	0
789	2	1	11	0	3	1	37	0	1	0	3	1	0	2	0	0	0	1	0	1	0	99	1	1	0	0	1	1	1	0	0	4	basis	1	0	0	0	309.81	296.32	301.6	301.82	0	0	0	Posttraumatische stress disorder(incl. de posttraumatische-stress disorder bij kinderen van 6jr en jonger): met uitges	4	11	0	0
790	1	1	23	0	3	1	52	0	1	0	3	1	0	2	0	0	0	1	0	1	0	99	0	1	1	0	0	0	0	0	0	6	WO	11	0	0	0	295.3	295.3	2271.09	0	0	0	0	schizophrenia	2	6	0	0
791	2	1	10	0	3	0	33	1	0	0	3	1	0	2	0	0	0	1	0	1	0	99	1	1	0	0	1	1	0	0	0	4	UBO	7	1	0	0	292	298.9	2262.89	2262.89	0	0	0	Psychotic disorder NAO	2	5	0	0
792	1	1	18	0	3	0	27	1	0	0	3	1	0	2	0	0	0	1	0	1	0	99	1	1	0	1	0	0	1	0	0	4	VMBO KB	4	0	0	0	298.9	304.4	799.9	0	0	0	0	Ongespecificeerde schizophreniaspectrum- of andere psychotische disorder.	2	5	0	0
793	2	1	24	0	3	1	47	0	1	0	3	1	1	2	0	0	0	1	0	1	0	99	0	1	1	0	0	0	0	0	0	5	HAVO	8	0	0	0	296.43	305.1	301.83	0	0	0	0	Bipolaire-1- disorder:laatste episode manisch. Niet gespecificeerd	3	4	0	0
794	1	1	11	0	3	1	39	0	1	0	3	1	0	2	0	0	0	1	0	1	0	99	1	1	0	0	1	1	1	0	1		basisschool	1	0	0	0	295.1	304.8			0	0	0	schizophrenia:gedesorganiseerde type	2	6	0	0
795	1	1	99	0	3	1	56	0	1	0	3	1	0	2	0	0	0	1	0	1	0	99	99	0	9	9	9	9	1	0	0		MBO2	4	0	0	0	298.9	0	301.9	0	0	0	0	Kortdurende psychotische disorder:met duidelijke stressor(en)	2	5	0	0
796	1	1	11	0	3	2	65	0	0	1	3	1	0	2	0	0	0	1	0	1	0	99	1	1	0	0	1	1	1	0	1	0	basisschool	1	0	0	0	295.7	0	318	2262.89	0	0	0	Schizoaffectieve disorder: bipolair type	2	6	0	0
797	1	1	12	0	3	0	29	1	0	0	3	1	0	2	0	0	0	1	0	1	0	99	1	1	0	0	1	1	0	0	0	4	VWO	9	0	0	0	299	298.9	799.9	0	0	0	0	Autismespectrum disorder	9	9	1	0
798	1	1	19	0	3	2	67	0	0	1	3	1	2	2	0	0	0	1	0	1	0	99	1	1	0	1	0	0	1	0	0	4	middelbare land en tuinbouwschool	4	1	0	0	296.8	0	2271.09	0	0	0	0	Bipolaire-1- disorder:actuele of meest recente episode manisch-Gedeeltelijk in remissie	3	4	0	0
799	1	1	4	0	3	0	26	1	0	0	3	1	0	2	0	0	0	1	0	1	0	99	1	1	0	0	1	1	1	1	1	0	MBO groen agrarisch	4	1	0	0	309.81	305.7	2262.89	0	0	0	0	Posttraumatische stress disorder(incl. de posttraumatische-stress disorder bij kinderen van 6jr en jonger)	4	11	0	0
800	1	1	15	0	3	0	35	1	0	0	3	1	2	2	0	0	0	1	0	1	0	99	1	1	0	0	1	1	1	0	0	1.5	MBO	4	1	0	0	298.9	314	317	0	0	0	0	Psychotic disorder NAO	2	5	1	0
801	1	1	12	0	3	0	29	1	0	0	3	1	0	2	0	0	0	1	0	1	0	99	1	1	0	0	1	1	1	0	0	4	VMBO	4	1	0	0	295.35	305.1	2271.09	0	0	0	0	schizophrenia	2	6	0	0
802	1	1	21	0	3	2	61	0	0	1	3	1	2	2	0	0	0	1	0	1	0	99	0	1	1	0	0	0	0	0	0	6	HBO	10	0	0	0	296.89	294.8	799.9	0	0	0	0	Bipolaire-1- disorder:actuele-of meest recente episode manisch-ernstig	3	4	0	0
803	1	1	19	0	3	1	56	0	1	0	3	1	0	2	0	0	0	1	0	1	0	99	1	1	0	1	0	0	0	0	0	4	MTS	7	0	0	0	295.6	0	2271.09	0	0	0	0	schizophrenia:resttype	2	6	0	0
804	1	1	20	0	3	0	33	1	0	0	3	1	0	2	0	0	0	1	0	1	0	99	0	1	1	0	0	0	1	0	0		VBO schilder	4	1	0	0	298.9	304.8			0	0	0	Stemmings disorder NAO	3	3	0	0
805	1	1	12	0	3	0	24	1	0	0	3	1	1	2	0	0	0	1	0	1	0	99	1	1	0	0	1	1	1	0	1	0	basisschool	1	0	0	0	298.9	304.2	301.9	317	0	0	0	Ongespecificeerde schizophreniaspectrum- of andere psychotische disorder.	2	5	0	0
806	1	1	18	0	3	1	45	0	1	0	3	1	0	2	0	0	0	1	0	1	0	99	1	1	0	1	0	0	1	0	0		LTS C niveau electro	4	0	0	0	295.3	304.8			0	0	0	schizophrenia:Paranoide type	2	6	0	0
807	1	1	23	0	3	1	53	0	1	0	3	1	4	2	0	0	0	1	0	1	0	99	0	1	1	0	0	0	1	#NULL!	5		LTS C niveau	4	0	99	99	304.2	304.3	301	0	0	0	0	Cocaïne-afhankelijkheid	1	8	0	0
808	1	1	20	0	3	0	32	1	0	0	3	1	0	2	0	0	0	1	0	1	0	99	0	1	1	0	0	0	0	0	0		MTS	7	0	0	0	298.9	304.8			0	0	0	Psychotic disorder NAO	2	5	0	0
809	1	1	24	0	3	1	41	0	1	0	3	1	0	2	0	0	0	1	0	1	0	99	0	1	1	0	0	0	0	0	0	5	HAVO	8	0	0	0	292.12	298.9	2271.09	0	0	0	0	Psychtische disorder NAO	2	5	0	0
810	2	1	14	0	3	0	21	1	0	0	3	1	0	2	0	0	0	1	0	1	0	99	1	1	0	0	1	1	0	0	0	4	VMBO TL horeca	6	0	0	0	295.9	2261.2	799.9	0	0	0	0	schizophrenia	2	6	0	0
811	1	1	21	1	3	0	28	1	0	0	3	1	1	2	0	0	0	1	0	1	0	99	0	1	1	0	0	0	0	0	0	4	MBO ondernemend manager	7	0	0	0	295.9	304.3	2271.09	0	0	0	0	schizophrenia	2	6	0	0
812	1	1	11	0	3	1	53	0	1	0	3	1	0	2	0	0	0	1	0	1	0	99	1	1	0	0	1	1	0	0	0		MTS	7	0	0	0	295.9	0	2271.09	0	0	0	0	schizophrenia	2	6	0	0
813	2	1	10	0	3	2	63	0	0	1	3	1	0	2	0	0	0	1	0	1	0	99	1	1	0	0	1	1	1	1	0	2	MAVO	5	1	0	0	295.9	0	317	0	0	0	0	schizophrenia	2	6	0	0
814	2	1	18	0	3	1	47	0	1	0	3	1	2	2	0	0	0	1	0	1	0	99	1	1	0	1	0	0	1	0	0	4	huishoudschool	4	0	0	0	295.7	294.9	317	0	0	0	0	Schizoaffectieve disorder: bipolair type	2	6	0	0
815	1	1	15	1	3	0	22	1	0	0	3	1	0	2	0	0	0	1	0	1	0	99	1	1	0	0	1	1	0	0	0	5	HAVO	8	0	0	0	295.9	0	2271.09	0	0	0	0	schizophrenia	2	6	0	0
816	1	1	16	0	3	2	60	0	0	1	3	1	1	2	0	0	0	1	0	1	0	99	1	1	0	1	0	0	0	0	0	3	kunstacademie	10	0	0	0	295.9	303.9	2271.09	0	0	0	0	schizophrenia: paranoidtype	2	6	0	0
818	1	1	25	0	3	1	48	0	1	0	3	1	0	2	0	0	0	1	0	1	0	99	0	1	1	0	0	0	0	0	0		HTS	10	0	0	0	295.1	0	2271.09	0	0	0	0	schizophrenia	2	6	0	0
819	2	1	22	0	3	1	47	0	1	0	3	1	0	2	0	0	0	1	0	1	0	99	0	1	1	0	0	0	0	0	0	3	Schoevers HBO	10	0	0	0	295.9	2215.81	2271.09	0	0	0	0	schizophrenia	2	6	0	0
821	1	1	21	0	3	1	37	0	1	0	3	1	0	2	0	0	0	1	0	1	0	99	0	1	1	0	0	0	1	0	0	6	MAVO	5	1	0	0	295.9	305.5	2271.09	0	0	0	0	Scizofrenie	2	6	0	0
822	1	1	99	0	3	1	52	0	1	0	3	1	0	2	0	0	0	1	0	1	0	99	99	0	9	9	9	9	1	#NULL!	5		lom school en het ILO doorlopen	2	0	0	0	295.9	314.9	2271.09	0	0	0	0	schizophrenia, gedesorganiseerd type	2	6	1	0
823	1	1	99	0	3	1	53	0	1	0	3	1	0	2	0	0	0	1	0	1	0	99	99	0	9	9	9	9	1	#NULL!	5		de Technische School	4	1	0	0	295.7	0	2271.09	0	0	0	0	Schizoaffectieve disorder	2	6	0	0
824	2	1	23	0	3	1	45	0	1	0	3	1	0	2	0	0	0	1	0	1	0	99	0	1	1	0	0	0	0	0	0	6	VWO	9	0	0	0	300.3	298.9	301.6	301.6	0	0	0	Andere gespecificeerde schizophreniaspectrum-of andere psychotische disorder	2	5	0	0
825	2	1	23	0	3	1	46	0	1	0	3	1	2	2	0	0	0	1	0	1	0	99	0	1	1	0	0	0	1	0	0	6	MAVO	5	1	0	0	297.1	297.1	2271.09	0	0	0	0	Uitgebreide neurocognitieve disorder door de ziekte van Alzheimer: zonder gedrags disordersen.	10	7	0	0
826	2	1	8	0	3	1	38	0	1	0	3	1	4	2	0	0	0	1	0	1	0	99	1	1	0	0	1	1	1	0	0		VMBO-B afgerond, en niveau 2-3 verzorging	5	0	0	0	295.7	0	317	2262.89	0	0	0	Schizoaffectieve disorder:bipolaire type	2	6	0	0
827	1	1	11	0	3	1	41	0	1	0	3	1	0	2	0	0	0	1	0	1	0	99	1	1	0	0	1	1	1	0	0		basisschool en opleiding in het stedelijk groen	4	1	0	0	292.9	298.9	2271.09	0	0	0	0	Ongespecificeerde schizophreniaspectrum- of andere psychotische disorder.	2	5	0	0
828	1	1	12	0	3	0	22	1	0	0	3	1	0	2	0	0	0	1	0	1	0	99	1	1	0	0	1	1	0	0	0		VMBO-T	6	0	2	0	299	304.3			0	0	0	Kortdurende psychotische disorder	2	5	1	0
829	2	1	18	0	3	1	43	0	1	0	3	1	0	2	0	0	0	1	0	1	0	99	1	1	0	1	0	0	0	0	0	6	HBO economie	10	0	0	0	295.9	298.9	2271.09	0	0	0	0	schizophrenia	2	6	0	0
830	1	1	99	0	3	1	42	0	1	0	3	1	0	2	0	0	0	1	0	1	0	99	99	0	9	9	9	9	0	#NULL!	5		HBO	10	0	99	99	300	303.9	301.9		0	0	0	Persoonlijkheids disorder NAO	6	0	0	0
831	1	1	99	0	3	0	33	1	0	0	3	1	0	2	0	0	0	1	0	1	0	99	99	0	9	9	9	9	1	#NULL!	5		IVBO (individueel voorbereidende beroepsonderwijs).	3	0	99	99	314	292.11	317	2262.89	0	0	0	Psychotic disorder NAO	2	5	1	0
832	1	1	10	0	3	1	54	0	1	0	3	1	0	2	0	0	0	1	0	1	0	99	1	1	0	0	1	1	1	2	2		bijbelscholen? Verder niks in dossier.	1	0	0	0	295.9	309.81	2271.09	0	0	0	0	schizophrenia	2	6	0	0
833	1	1	15	0	3	2	78	0	0	1	3	1	0	2	0	0	0	1	0	1	0	99	1	1	0	0	1	1	0	0	0		avondschool HBO	10	0	0	0	300	0	301.4	0	0	0	0	Dwangmatige persoonlijkheids disorder	6	0	0	0
834	2	1	99	0	3	1	59	0	1	0	3	1	0	2	0	0	0	1	0	1	0	99	99	0	9	9	9	9	1	#NULL!	5		mavo	5	1	99	99	295.9	0	799.9	0	0	0	0	schizophrenia, ongedifferent. type	2	6	0	0
835	1	1	5	0	3	2	69	0	0	1	3	1	0	2	0	0	0	1	0	1	0	99	1	1	0	0	1	1	0	0	0	4	Ondernemersschool MBO	7	1	0	0	295.9	0	2271.09	0	0	0	0	schizophrenia	2	6	0	0
836	2	1	99	0	3	2	70	0	0	1	3	1	0	2	0	0	0	1	0	1	0	99	99	0	9	9	9	9	1	#NULL!	5		huishoudschool	4	0	99	99	295.3	0	301.9	0	0	0	0	schizophrenia, paranoidtype	2	6	0	0
837	2	1	99	1	3	1	58	0	1	0	3	1	0	2	0	0	0	1	0	1	0	99	99	0	9	9	9	9	1	#NULL!	5		basisschool	1	0	99	99	295.4	298.9	318	0	0	0	0	Psychotic disorder NAO	2	5	0	0
838	1	1	9	0	3	1	56	0	1	0	3	1	0	2	0	0	0	1	0	1	0	99	1	1	0	0	1	1	1	0	0	2	Landbouw school	4	1	0	0	298.9	299.8	2262.89	0	0	0	0	Ongespecificeerde schizophreniaspectrum- of andere psychotische disorder.	2	5	1	0
839	2	1	99	0	3	2	75	0	0	1	3	1	0	2	0	0	0	1	0	1	0	99	99	0	9	9	9	9	1	#NULL!	5		basisschool	1	0	99	99	295.1	0	2271.09	0	0	0	0	schizophrenia, gedesorganiseerd type	2	6	0	0
840	1	1	99	0	3	2	79	0	0	1	3	1	0	2	0	0	0	1	0	1	0	99	99	0	9	9	9	9	1	#NULL!	5		ulo	5	1	99	99	296.56	316	301.81	0	0	0	0	Bipolaire disorder NAO	3	4	0	0
841	2	1	99	0	3	1	55	0	1	0	3	1	0	2	0	0	0	1	0	1	0	99	99	0	9	9	9	9	1	#NULL!	5		mavo	5	1	99	99	295.3	0	2271.09	0	0	0	0	Psychotic disorder NAO	2	5	0	0
842	2	1	99	0	3	1	39	0	1	0	3	1	0	2	0	0	0	1	0	1	0	99	99	0	9	9	9	9	1	#NULL!	5		VSO daarna mbo	4	1	99	99	312.9	309.81	301.9	301.9	0	0	0	Posttraumatic stress- disorder	4	11	1	0
843	1	1	20	0	3	1	44	0	1	0	3	1	0	2	0	0	0	1	0	1	0	99	0	1	1	0	0	0	1	0	0	4	LTS	4	0	0	0	298.9	0	319	319	0	0	0	Andere gespecificeerde schizophreniaspectrum-of andere psychotische disorder	2	5	0	0
844	1	1	18	0	3	0	35	1	0	0	4	1	0	2	0	0	0	1	0	1	0	1	1	1	0	1	0	0	1	0	1		basisschool	1	0	0	0	299	0	2271.09	0	0	0	0	Autistische disorder	9	9	1	0
845	2	1	15	0	3	2	60	0	0	1	4	1	0	2	0	0	0	1	0	1	0	3	1	1	0	0	1	1	1	0	0		huishoudschool	4	0	0	0	295.1	0	301.5	0	0	0	0	schizophrenia: Gedesorganiseerde type	2	6	0	0
846	2	1	22	0	3	1	42	0	1	0	4	1	0	2	0	0	0	1	0	1	0	1	0	1	1	0	0	0	1	0	0	4	veterdiploma	1	0	0	0	291.9	314.01	301.83	0	0	0	0	Aandachtstekort disorder met hyperactiviteit NAO	9	9	1	0
847	1	1	13	1	3	0	26	1	0	0	4	1	1	2	0	0	0	1	0	1	0	6	1	1	0	0	1	1	1	1	0	4	vmbo	4	1	0	0	295.9	304.3	301.7	0	0	0	0	schizophrenia: Ongedifferentieerde type	2	6	0	0
848	1	1	23	0	3	0	28	1	0	0	4	1	0	2	0	0	0	1	0	1	0	1	0	1	1	0	0	0	1	0	0	4	vmbo	4	1	0	0	300.02	298.9	301.9	0	0	0	0	schizophrenia: Gedesorganiseerde type	2	6	0	0
849	1	1	15	0	3	0	35	1	0	0	4	1	0	2	0	0	0	1	0	1	0	1	1	1	0	0	1	1	1	0	0		bouw	4	1	0	0	295.3	0	2271.09	0	0	0	0	schizophrenia: paranoidtype	2	6	0	0
850	1	1	13	1	3	0	30	1	0	0	4	1	0	2	0	0	0	1	0	1	0	1	1	1	0	0	1	1	1	1	1		antiliaans lts	4	0	0	0	295.2	0	799.9	0	0	0	0	schizophrenia: Katatone type	2	6	0	0
851	1	1	22	0	3	0	27	1	0	0	4	1	0	2	0	0	0	1	0	1	0	1	0	1	1	0	0	0	1	0	0	4	vmbo groen 4 jaar, beginnend hovenier 3 jaar speciaal onderwijs daarna 1 gewoon	3	0	0	0	299	0	799.9	0	0	0	0	Autistische disorder	9	9	1	0
853	1	1	18	0	3	1	36	0	1	0	4	1	0	2	0	0	0	1	0	1	0	1	1	1	0	1	0	0	1	0	0	5	mbo wegenbouw	4	1	0	0	292.11	299.8	2271.09	0	0	0	0	PDD-NOS	9	9	1	0
854	1	1	6	0	3	2	66	0	0	1	4	1	0	2	0	0	0	1	0	1	0	3	1	1	0	0	1	1	1	1	1	0	geen	0	0	1	1	300.02	298.8	319	0	0	0	0	Gegeneraliseerde angst disorder	4	2	0	0
855	2	1	25	0	3	0	25	1	0	0	4	1	0	2	0	0	0	1	0	1	0	1	0	1	1	0	0	0	0	0	0	5	vmbo tl	6	0	0	0	299	311	301.9	0	0	0	0	Asperger	9	9	1	0
856	2	1	24	0	3	1	56	0	1	0	4	1	0	2	0	0	0	1	0	1	0	3	0	1	1	0	0	0	0	0	0	6	havo	8	0	0	0	295.3	0	2271.09	0	0	0	0	schizophrenia: paranoidtype, ononderbroken	2	6	0	0
857	2	1	23	0	3	1	42	0	1	0	4	1	0	2	0	0	0	1	0	1	0	1	0	1	1	0	0	0	1	0	0	4	lbo	4	0	0	0	296.3	307.59	2271.09	0	0	0	0	Depressieve disorder: Recidiverend, niet gespecificeerd	3	3	0	0
858	2	1	10	0	3	2	69	0	0	1	4	1	0	2	0	0	0	1	0	1	0	1	1	1	0	0	1	1	1	0	0	2	basisschool	1	0	0	0	295.3	0	2271.09	0	0	0	0	schizophrenia: paranoidtype	2	6	0	0
859	2	1	15	0	3	1	59	0	1	0	4	1	0	2	0	0	0	1	0	1	0	3	1	1	0	0	1	1	1	0	0	4	mavo	5	1	0	0	295.3	299	301.83	2262.89	0	0	0	schizophrenia: paranoidtype	2	6	1	0
860	1	1	20	0	3	2	61	0	0	1	4	1	0	2	0	0	0	1	0	1	0	3	0	1	1	0	0	0	1	0	0	4	basisschool, 1,5 jaar kunstacademie, 4 jaar gymnasium	1	0	0	0	298.9	0	2271.09	0	0	0	0	schizophrenia: Resttype	2	6	0	0
861	1	1	19	0	3	1	45	0	1	0	4	1	0	2	0	0	0	1	0	1	0	1	1	1	0	1	0	0	1	0	0	5	lts b niveau	4	0	0	0	295.1	305.2	301.9	0	0	0	0	schizophrenia: Gedesorganiseerde type, ononderbroken	2	6	0	0
862	1	1	11	0	3	2	60	0	0	1	4	1	0	2	0	0	0	1	0	1	0	3	1	1	0	0	1	1	1	0	0	1	niks afgemaakt	1	0	0	0	295.3	0	301.9	0	0	0	0	Persoonlijkheids disorder nao	6	0	0	0
863	1	1	14	0	3	0	31	1	0	0	4	1	0	2	0	0	0	1	0	1	0	1	1	1	0	0	1	1	1	1	0	4	basisschool	1	0	0	0	295.3	0	2271.09	0	0	0	0	schizophrenia: paranoidtype	2	6	0	0
864	2	1	18	0	3	1	52	0	1	0	4	1	0	2	0	0	0	1	0	1	0	1	1	1	0	1	0	0	1	0	0	5	leao	4	0	0	0	298.9	0	317	0	0	0	0	Lichte zwakzinnigheid	7	0	0	0
865	2	1	25	0	3	1	42	0	1	0	4	1	0	2	0	0	0	1	0	1	0	1	0	1	1	0	0	0	0	0	0	6	vwo	9	0	0	0	299	0	301.83	301.6	0	0	0	Autistische disorder	9	9	1	0
866	1	1	19	0	3	2	62	0	0	1	4	1	0	2	0	0	0	1	0	1	0	1	1	1	0	1	0	0	1	0	0	3	lagere school	1	0	0	0	295.6	303.9	2271.09	0	0	0	0	schizophrenia: Resttype	2	6	0	0
867	1	1	16	0	3	1	44	0	1	0	4	1	0	2	0	0	0	1	0	1	0	1	1	1	0	1	0	0	9	0	0	4	kan zich niet herinneren, gaten in geheugen	99	99	0	0	295.6	0	2271.09	0	0	0	0	schizophrenia: Resttype	2	6	0	0
868	1	1	20	0	3	0	28	1	0	0	4	1	0	2	0	0	0	1	0	1	0	1	0	1	1	0	0	0	1	0	0	2	mbo nivo 2	4	0	0	0	300.4	295.2			0	0	0	Dysthyme disorder	3	3	0	0
869	2	1	19	0	3	2	66	0	0	1	4	1	0	2	0	0	0	1	0	1	0	2	1	1	0	1	0	0	1	0	0	4	huishoudschool	4	0	0	0	294.1	300.01	301.9	0	0	0	0	Psychotic disorder NAO	2	5	0	0
870	1	1	24	1	3	1	40	0	1	0	4	1	0	2	0	0	0	1	0	1	0	1	0	1	1	0	0	0	1	0	0	5	mavo	5	1	0	0	295.3	305	2271.09	0	0	0	0	schizophrenia: paranoidtype	2	6	0	0
871	1	1	23	0	3	1	38	0	1	0	4	1	0	2	0	0	0	1	0	1	0	1	0	1	1	0	0	0	0	0	0	5	havo	8	0	0	0	295.4	0	2271.09	0	0	0	0	Schizofreniforme disorder: Met gunstige prognostische kenmerken	2	6	0	0
872	2	1	15	0	3	0	34	1	0	0	4	1	0	2	0	0	0	1	0	1	0	1	1	1	0	0	1	1	1	0	0	4	verzorgende niet afgemaakt middelbare school wel	4	1	0	0	298.9	0	317	0	0	0	0	schizophrenia: Resttype	2	6	0	0
873	1	1	11	0	3	1	57	0	1	0	4	1	0	2	0	0	0	1	0	1	0	1	1	1	0	0	1	1	1	0	1	3	lom, lts maar geen diploma, horeca getuigschrift	2	0	0	0	295.1	0	301.7	0	0	0	0	schizophrenia: Gedesorganiseerde type	2	6	0	0
874	1	1	21	0	3	1	54	0	1	0	4	1	0	2	0	0	0	1	0	1	0	1	0	1	1	0	0	0	1	0	0	4	mavo, middelbare landbouschool 3 jarig	5	0	1	0	295.7	0	2271.09	0	0	0	0	Schizoaffectieve disorder: bipolair type	2	6	0	0
875	1	1	19	0	3	1	56	0	1	0	4	1	0	2	0	0	0	1	0	1	0	1	1	1	0	1	0	0	1	0	0	4	streekschool	4	0	0	0	296.4	0	2271.09	0	0	0	0	Bipolaire I disorder: Laatste episode manisch, Niet-gespecificeerd	3	4	0	0
876	1	1	18	0	3	0	34	1	0	0	4	1	2	2	0	0	0	1	0	1	0	1	1	1	0	1	0	0	1	0	0	4	koksschool vmbo	4	1	0	0	295.3	305.7	2271.09	0	0	0	0	schizophrenia: paranoidtype	2	6	0	0
877	2	1	23	0	3	1	41	0	1	0	4	1	0	2	0	0	0	1	0	1	0	6	0	1	1	0	0	0	0	0	0	4	meao	7	0	0	0	299	298.8	2271.09	0	0	0	0	Schizoaffectieve disorder: bipolair type	2	6	1	0
878	1	1	23	0	3	1	38	0	1	0	4	1	0	2	0	0	0	1	0	1	0	1	0	1	1	0	0	0	1	0	0	3	lts (met spieken), speciaal onderwijs:nee (maar moest daar eigenlijk wel heen)	4	0	0	0	296.44	314.01	2262.89	0	0	0	0	Aandachtstekort disorder met hyperactiviteit: Overwegend hyperactief-impuls type	9	9	1	0
879	2	1	17	1	3	0	32	1	0	0	4	1	0	2	0	0	0	1	0	1	0	1	1	1	0	1	0	0	1	2	2		basisschool	1	0	99	99	295.7	0	2271.09	0	0	0	0	Schizoaffectieve disorder: bipolair type	2	6	0	0
880	2	1	24	0	3	0	30	1	0	0	4	1	1	2	0	0	0	1	0	1	0	1	0	1	1	0	0	0	0	0	0	6	vwo	9	0	0	0	296.32	300.14	301.82	301.83	0	0	0	Depressieve disorder: Recidive Medium. Anorexia Nervosa	3	3	0	0
881	1	1	13	1	3	1	50	0	1	0	4	1	0	2	0	0	0	1	0	1	0	1	1	1	0	0	1	1	1	1	0		lts	4	0	0	0	295.3	0	2271.09	0	0	0	0	schizophrenia: paranoidtype	2	6	0	0
882	2	1	22	0	3	0	29	1	0	0	4	1	0	2	0	0	0	1	0	1	0	1	0	1	1	0	0	0	1	0	1		basisschool	1	0	0	0	300	299.8	301.9	0	0	0	0	Pervasieve ontwikkelings disorder nao	9	9	1	0
883	1	1	19	1	3	1	50	0	1	0	4	1	0	2	0	0	0	1	0	1	0	1	1	1	0	1	0	0	1	0	0	5	mavo	5	1	0	0	295.1	304.8	2271.09	0	0	0	0	schizophrenia: Gedesorganiseerde type	2	6	0	0
884	1	1	13	0	3	2	68	0	0	1	4	1	0	2	0	0	0	1	0	1	0	1	1	1	0	0	1	1	1	0	0		3 jarig hbs, middelbare: geen examen gehaald vanwege black out.	1	0	0	0	295.7	300.81	2271.09	0	0	0	0	Schizoaffectieve disorder: bipolair type	2	6	0	0
885	1	1	20	0	3	1	59	0	1	0	4	1	0	2	0	0	0	1	0	1	0	1	0	1	1	0	0	0	0	0	0		havo duim diploma door 7 jaar atheneum	8	0	0	0	295.3	0	2271.09	0	0	0	0	schizophrenia: paranoidtype	2	6	0	0
886	1	1	18	0	3	0	34	1	0	0	4	1	0	2	0	0	0	1	0	1	0	1	1	1	0	1	0	0	1	0	0		vbo c	4	1	0	0	295.7	302.6	2271.09	0	0	0	0	Schizoaffectieve disorder: bipolair type	2	6	0	0
887	1	1	15	0	3	1	48	0	1	0	4	1	1	2	0	0	0	1	0	1	0	1	1	1	0	0	1	1	1	#NULL!	0		lts b nivo	4	0	0	0	295.7	0	301.6	0	0	0	0	Schizoaffectieve disorder: bipolair type	2	6	0	0
888	2	1	9	0	3	1	36	0	1	0	4	1	0	2	0	0	0	1	0	1	0	1	1	1	0	0	1	1	1	0	0	2	niets	1	0	0	0	295.1	0	2271.09	0	0	0	0	schizophrenia: Gedesorganiseerde type	2	6	0	0
889	1	1	9	0	3	1	55	0	1	0	4	1	0	2	0	0	0	1	0	1	0	1	1	1	0	0	1	1	1	0	0	6	verpleging	4	1	0	0	295.1	0	2271.09	0	0	0	0	schizophrenia: Gedesorganiseerde type, ononderbroken	2	6	0	0
891	2	1	19	0	3	2	61	0	0	1	4	1	0	2	0	0	0	1	0	1	0	3	1	1	0	1	0	0	1	0	0	4	mms middelbare meisjesschool	5	1	0	0	309.81	309	301.83	0	0	0	0	Posttraumatic stress- disorder, Chronisch	4	11	0	0
892	1	1	12	0	3	1	56	0	1	0	4	1	0	2	0	0	0	1	0	1	0	1	1	1	0	0	1	1	1	0	0	10	niets	1	0	0	0	295.3	0	2271.09	0	0	0	0	schizophrenia: paranoidtype	2	6	0	0
893	1	1	17	0	3	1	43	0	1	0	4	1	0	2	0	0	0	1	0	1	0	1	1	1	0	1	0	0	0	0	0		mts	7	0	0	0	295.3	0	301.7	0	0	0	0	schizophrenia: paranoidtype	2	6	0	0
894	2	1	13	0	3	1	43	0	1	0	4	1	1	2	0	0	0	1	0	1	0	1	1	1	0	0	1	1	1	0	0	4	niets	1	0	0	0	300.15	309.81	301.9	0	0	0	0	Dissociatieve disorder nao	0	1	0	0
895	2	1	23	0	3	1	55	0	1	0	4	1	2	2	0	0	0	1	0	1	0	1	0	1	1	0	0	0	0	0	0	4	havo	8	0	0	0	312.89	295.9	799.9	0	0	0	0	Gedrags disorder nao	0	1	0	1
896	1	1	18	0	3	1	45	0	1	0	4	1	0	2	0	0	0	1	0	1	0	1	1	1	0	1	0	0	1	0	0	6	mbo nivo 2	4	0	0	0	295.3	304.3	317	0	0	0	0	schizophrenia: paranoidtype	2	6	0	0
897	1	1	14	0	3	2	64	0	0	1	4	1	0	2	0	0	0	1	0	1	0	1	1	1	0	0	1	1	0	0	0		hbs, hts niet afgemaakt	9	0	0	0	295.3	0	2271.09	0	0	0	0	schizophrenia: paranoidtype	2	6	0	0
898	1	1	27	0	3	2	66	0	0	1	4	1	0	2	0	0	0	1	0	1	0	1	0	1	1	0	0	0	1	0	0	2	mavo	5	1	1	0	295.6	0	2271.09	0	0	0	0	schizophrenia: Resttype	2	6	0	0
899	1	1	10	0	3	1	46	0	1	0	4	1	0	2	0	0	0	1	0	1	0	1	1	1	0	0	1	1	1	0	1	0	lagere school	1	0	0	0	295.3	0	301.7	0	0	0	0	schizophrenia: paranoidtype	2	6	0	0
900	1	1	18	0	3	1	36	0	1	0	4	1	0	2	0	0	0	1	0	1	0	1	1	1	0	1	0	0	1	0	0	7	vmbo	4	1	0	0	299	299.8	317	0	0	0	0	schizophrenia: paranoidtype. PDD-NOS	2	6	1	0
901	2	1	13	0	3	0	29	1	0	0	4	1	2	2	0	0	0	1	0	1	0	1	1	1	0	0	1	1	1	0	0	5	geen	0	0	0	0	309.4	304.8	301.83	0	0	0	0	Psychotische disorder door een middel: Ander (of onbekend middel met hallucinaties)	2	5	0	0
903	2	1	27	0	3	1	38	0	1	0	4	1	0	2	0	0	0	1	0	1	0	6	0	1	1	0	0	0	0	0	0	7	vwo	9	0	0	0	295.7	0	301.9	0	0	0	0	Bipolaire I disorder	3	4	0	0
904	1	1	9	0	3	2	62	0	0	1	4	1	0	2	0	0	0	1	0	1	0	1	1	1	0	0	1	1	1	0	0	6	mulo	5	1	0	99	295.6	0	2271.09	0	0	0	0	schizophrenia: Resttype	2	6	0	0
905	1	1	14	0	3	1	51	0	1	0	4	1	0	2	0	0	0	1	0	1	0	1	1	1	0	0	1	1	0	0	0	4	heao, hogere informatica opleiding, dossier;mts	10	0	0	0	295.1	0	2271.09	0	0	0	0	schizophrenia: Gedesorganiseerde type	2	6	0	0
906	1	1	5	0	3	0	27	1	0	0	4	1	0	2	0	0	0	1	0	1	0	1	1	1	0	0	1	1	0	0	0	4	vmbo tl	6	0	0	0	299	292.9			0	0	0	PDD-NOS	9	9	1	0
907	1	1	18	0	3	2	61	0	0	1	4	1	0	2	0	0	0	1	0	1	0	1	1	1	0	1	0	0	0	0	0	5	havo	8	0	0	0	295.3	0	301.9	0	0	0	0	schizophrenia: paranoidtype	2	6	0	0
908	1	1	9	1	3	0	29	1	0	0	4	1	0	2	0	0	0	1	0	1	0	1	1	1	0	0	1	1	1	0	0	4	praktijonderwijs vmbo	4	1	0	0	295.3	298.9	2262.89	0	0	0	0	schizophrenia: paranoidtype	2	6	0	0
909	1	1	15	0	3	1	42	0	1	0	4	1	0	2	0	0	0	1	0	1	0	1	1	1	0	0	1	1	1	0	1	4	lagere school	1	0	0	0	295.3	0	2271.09	0	0	0	0	schizophrenia: paranoidtype	2	6	0	0
910	1	1	12	0	3	1	37	0	1	0	4	1	0	2	0	0	0	1	0	1	0	1	1	1	0	0	1	1	1	0	0		basisschool	1	0	0	0	295.3	305.9	799.9	0	0	0	0	schizophrenia: paranoidtype	2	6	0	0
911	2	1	26	0	3	1	53	0	1	0	4	1	0	2	0	0	0	1	0	1	0	3	0	1	1	0	0	0	0	0	0	6	heao ,( vwo)	10	0	0	0	296.33	2262.81	301.9	0	0	0	0	Persoonlijkheids disorder nao	6	0	0	0
912	1	1	24	1	3	0	23	1	0	0	4	1	1	2	0	0	0	1	0	1	0	1	0	1	1	0	0	0	1	0	0	3	basisischool, tot 2 havo daarna ziek	1	0	0	0	295.1	304.8	2271.09	0	0	0	0	schizophrenia: Gedesorganiseerde type, ononderbroken	2	6	0	0
913	1	1	22	0	3	2	62	0	0	1	4	1	0	2	0	0	0	1	0	1	0	1	0	1	1	0	0	0	1	0	0	4	lts t stroom	4	0	0	0	295.3	0	2271.09	0	0	0	0	schizophrenia: paranoidtype	2	6	0	0
914	2	1	99	1	3	1	57	0	1	0	4	1	1	2	0	0	0	1	0	1	1	3	99	0	9	9	9	9	9	1	1	4		99	99	0	0	300.9	314.01	301.9	0	0	0	0	Aandachtstekort disorder met hyperactiviteit: Overwegend hyperactief-impuls type	9	9	1	0
915	1	1	99	0	3	0	25	1	0	0	4	1	0	2	0	0	0	1	0	1	0	6	99	0	9	9	9	9	9	0	0			99	99	0	0	295.3	299	2271.09	0	0	0	0	schizophrenia: paranoidtype, ononderbroken	2	6	1	0
916	1	1	99	0	3	1	51	0	1	0	4	1	0	2	0	0	0	1	0	1	0	1	99	0	9	9	9	9	9	0	1	0		99	99	0	0	295.3	0	2262.89	0	0	0	0	schizophrenia: paranoidtype	2	6	0	0
917	1	1	99	0	3	1	39	0	1	0	4	1	0	2	0	0	0	1	0	1	0	1	99	0	9	9	9	9	9	0	0			99	99	0	0	295.3	0	2271.09	0	0	0	0	schizophrenia: paranoidtype	2	6	0	0
918	1	1	99	0	3	1	53	0	1	0	4	1	0	2	0	0	0	1	0	1	0	1	99	0	9	9	9	9	9	0	0			99	99	0	0	295.3	0	2271.09	0	0	0	0	schizophrenia: paranoidtype	2	6	0	0
919	1	1	21	0	3	0	34	1	0	0	4	1	0	2	0	0	0	1	0	1	0	1	0	1	1	0	0	0	9	0	0	4	2 jaar vbo 2 jaar technische school	99	99	0	1	295.3	305.7	2271.09	0	0	0	0	Psychotic disorder NAO	2	5	0	0
920	1	1	99	0	3	1	41	0	1	0	4	1	0	2	0	0	0	1	0	1	0	2	99	0	9	9	9	9	9	0	0	2		99	99	0	0	295.9	303.9	318	0	0	0	0	Autistische disorder	9	9	0	0
921	2	1	99	0	3	2	63	0	0	1	4	1	0	2	0	0	0	1	0	1	0	1	99	0	9	9	9	9	9	0	0	5		99	99	0	0	295.1	0	2271.09	0	0	0	0	schizophrenia: Gedesorganiseerde type	2	6	0	0
922	2	1	99	0	3	2	62	0	0	1	4	1	0	2	0	0	0	1	0	1	0	2	99	0	9	9	9	9	9	0	0			99	99	0	0	295.7	0	301.9	0	0	0	0	Schizoaffectieve disorder: bipolair type	2	6	0	0
923	1	1	99	0	3	1	44	0	1	0	4	1	0	2	0	0	0	1	0	1	0	1	99	0	9	9	9	9	9	0	0	2		99	99	0	0	298.9	0	2271.09	0	0	0	0	schizophrenia: Gedesorganiseerde type, ononderbroken	2	6	0	0
924	1	1	99	0	3	1	50	0	1	0	4	1	0	2	0	0	0	1	0	1	0	3	99	0	9	9	9	9	9	0	0	1		99	99	0	0	295.7	0	317	0	0	0	0	Schizoaffectieve disorder: bipolair type	2	6	0	0
925	1	1	99	1	3	1	45	0	1	0	4	1	0	2	0	0	0	1	0	1	0	1	99	0	9	9	9	9	9	1	1	0		99	99	0	0	295.1	0	2271.09	0	0	0	0	schizophrenia: Gedesorganiseerde type	2	6	0	0
926	1	1	99	0	3	2	60	0	0	1	4	1	0	2	0	0	0	1	0	1	0	1	99	0	9	9	9	9	9	0	0	5		99	99	0	0	295.3	0	2271.09	0	0	0	0	schizophrenia: paranoidtype	2	6	0	0
928	1	1	99	0	3	1	59	0	1	0	4	1	0	2	0	0	0	1	0	1	0	1	99	0	9	9	9	9	9	0	0	4		99	99	0	0	295.3	0	2271.09	0	0	0	0	schizophrenia: paranoidtype	2	6	0	0
929	1	1	10	0	3	0	27	1	0	0	4	1	2	2	0	0	0	1	0	1	0	1	1	1	0	0	1	1	9	0	0		weet niet	99	99	0	0	295.3	0	2271.09	0	0	0	0	schizophrenia: paranoidtype, Episodisch met restsymptomen tussen de episoden	2	6	0	0
930	1	1	11	0	3	1	38	0	1	0	4	1	0	2	0	0	0	1	0	1	0	1	1	1	0	0	1	1	1	0	0		mbo horeca	4	1	0	0	295.9	304.8	2262.89	0	0	0	0	schizophrenia: Gedesorganiseerde type	2	6	0	0
931	2	1	20	0	3	0	21	1	0	0	4	1	2	2	0	0	0	1	0	1	0	1	0	1	1	0	0	0	1	0	0		basisschool	1	0	0	0	304.9	303	301.83	0	0	0	0	Pervasieve ontwikkelings disorder nao	9	9	0	0
932	2	1	18	0	3	0	33	1	0	0	4	1	0	2	0	0	0	1	0	1	0	1	1	1	0	1	0	0	0	0	0	4	mbo en propedeuse hbo jur. Dienstverlening	7	1	0	0	305.2	0	301.83	0	0	0	0	Borderline personality disorder	6	0	0	0
933	2	1	19	0	3	1	48	0	1	0	4	1	0	2	0	0	0	1	0	1	0	1	1	1	0	1	0	0	9	0	0	4	lho typ diploma	99	99	0	0	2271.09	0	301.83	317	0	0	0	Borderline personality disorder	6	0	0	1
934	1	1	21	1	3	0	27	1	0	0	4	1	0	2	0	0	0	1	0	1	0	1	0	1	1	0	0	0	1	0	0		vmbo	4	1	0	0	309.81	300.01	301.83	319	0	0	0	Schizoaffectieve disorder: bipolair type	2	6	0	0
935	1	1	13	0	3	1	58	0	1	0	4	1	0	2	0	0	0	1	0	1	0	1	1	1	0	0	1	1	1	0	0	5	lts	4	1	0	0	302.2	295.9	301.9	0	0	0	0	Pedofilie exclusieve type	9	9	0	0
936	1	1	99	0	3	2	63	0	0	1	4	1	0	2	0	0	0	1	0	1	0	1	99	0	9	9	9	9	9	0	0	4		99	99	0	0	295.3	0	2271.09	0	0	0	0	schizophrenia: paranoidtype	2	6	0	0
937	2	1	99	0	3	1	55	0	1	0	4	1	0	2	0	0	0	1	0	1	0	1	99	0	9	9	9	9	9	0	0	2		99	99	0	0	295.3	0	799.9	0	0	0	0	schizophrenia: paranoidtype	2	6	0	0
938	1	1	99	0	3	1	58	0	1	0	4	1	0	2	0	0	0	1	0	1	0	1	99	0	9	9	9	9	9	0	0	4		99	99	0	0	295.7	0	2271.09	0	0	0	0	Schizoaffectieve disorder: bipolair type	2	6	0	0
939	2	1	99	0	3	1	49	0	1	0	4	1	0	2	0	0	0	1	0	1	0	1	99	0	9	9	9	9	9	0	0	2		99	99	0	0	295.7	2262.2	301.83	0	0	0	0	Schizoaffectieve disorder: bipolair type	2	6	0	0
940	2	1	99	0	3	1	58	0	1	0	4	1	0	2	0	0	0	1	0	1	0	3	99	0	9	9	9	9	9	0	0	4		99	99	0	0	295.7	295.7	301.9	0	0	0	0	Schizoaffectieve disorder: depressieve type	2	6	0	0
941	1	1	99	0	3	1	57	0	1	0	4	1	0	2	0	0	0	1	0	1	0	1	99	0	9	9	9	9	9	0	0	2		99	99	0	0	295.1	304.8	2271.09	0	0	0	0	schizophrenia: Gedesorganiseerde type	2	6	0	0
942	1	1	99	0	3	1	36	0	1	0	4	1	0	2	0	0	0	1	0	1	0	99	99	0	9	9	9	9	1	0	0			5	1	0	0	295.3	304.3	301.7	317	0	0	0	Psychotic disorder NAO	2	5	0	0
943	1	1	99	0	3	1	51	0	1	0	4	1	0	2	0	0	0	1	0	1	0	1	99	0	9	9	9	9	9	0	0	4		99	99	0	0	298.9	300.4	2262.89	0	0	0	0	schizophrenia: Gedesorganiseerde type	2	6	0	0
944	1	1	99	0	3	1	50	0	1	0	4	1	0	2	0	0	0	1	0	1	0	1	99	0	9	9	9	9	9	1	2			99	99	99	99	304.3	300.4	301.9	2262.89	0	0	0	Persoonlijkheids disorder nao	6	0	0	0
945	2	1	99	0	3	1	49	0	1	0	4	1	0	2	0	0	0	1	0	1	0	3	99	0	9	9	9	9	9	0	0	4		99	99	0	0	295.7	300.01	317	0	0	0	0	Schizoaffectieve disorder: bipolair type	2	6	0	0
946	1	1	24	0	3	1	39	0	1	0	4	1	3	2	0	0	0	1	0	1	0	1	0	1	1	0	0	0	1	0	0		basisschool	1	0	0	0	298.9	295.7	2271.09	0	0	0	0	Schizoaffectieve disorder: bipolair type	2	6	0	0
947	1	1	99	0	3	1	45	0	1	0	4	1	0	2	0	0	0	1	0	1	0	1	99	0	9	9	9	9	1	0	0			1	0	0	0	312.9	294.9	301.9	0	0	0	0	Aandachtstekort disorder met hyperactiviteit: gecombineerde type	9	9	1	0
948	1	1	99	0	3	1	40	0	1	0	4	1	0	2	0	0	0	1	0	1	0	1	99	0	9	9	9	9	9	0	0	5		99	99	0	0	295.3	0	2271.09	0	0	0	0	schizophrenia: paranoidtype, ononderbroken	2	6	0	0
949	1	1	21	0	3	1	52	0	1	0	4	1	0	2	0	0	0	1	0	1	0	3	0	1	1	0	0	0	1	0	0	4	lts c nivo	4	0	0	0	298.8	300	301.4	0	0	0	0	Psychotic disorder NAO	2	5	0	0
950	1	1	99	0	3	1	56	0	1	0	4	1	0	2	0	0	0	1	0	1	0	1	99	0	9	9	9	9	9	0	0	4		99	99	0	0	295.3	0	2271.09	0	0	0	0	schizophrenia: paranoidtype	2	6	0	0
951	1	1	99	0	3	2	62	0	0	1	4	1	0	2	0	0	0	1	0	1	0	3	99	0	9	9	9	9	9	0	0	4		99	99	0	0	2271.02	300	301.22	301.9	0	0	0	Psychotic disorder NAO	2	5	0	0
952	1	1	99	0	3	0	31	1	0	0	4	1	0	2	0	0	0	1	0	1	0	1	99	0	9	9	9	9	9	0	0	4		99	99	0	0	298.9	0	799.9	0	0	0	0	schizophrenia: Gedesorganiseerde type, eenmalige episode gedeeltelijk in remissie	2	6	0	0
953	2	1	99	0	3	1	58	0	1	0	4	1	0	2	0	0	0	1	0	1	0	2	99	0	9	9	9	9	9	0	0			99	99	0	0	298.9	295.1	301.7	301.7	0	0	0	Psychotic disorder NAO	2	5	0	0
954	2	1	99	0	3	2	61	0	0	1	4	1	0	2	0	0	0	1	0	1	0	1	99	0	9	9	9	9	9	0	0	3		99	99	0	0	295.7	0	301.9	0	0	0	0	schizophrenia: Gedesorganiseerde type, ononderbroken	2	6	0	0
956	1	1	99	0	3	1	46	0	1	0	4	1	0	2	0	0	0	1	0	1	0	1	99	0	9	9	9	9	9	0	0	5		99	99	0	0	295.3				0	0	0	schizophrenia: paranoidtype	2	6	0	0
957	2	1	99	0	3	2	62	0	0	1	4	1	0	2	0	0	0	1	0	1	0	1	99	0	9	9	9	9	9	0	0	2		99	99	0	0	298.9	0	301.9	317	0	0	0	Psychotic disorder NAO	2	5	0	0
958	1	1	8	0	3	1	57	0	1	0	4	1	0	2	0	0	0	1	0	1	0	1	1	1	0	0	1	1	1	0	0		basisschool, hdr kan niet aangeven wat hij na de basisschool heeft gedaan	1	0	0	0	295.6	0	2271.09	0	0	0	0	schizophrenia: Resttype	2	6	0	0
959	1	1	99	0	3	1	53	0	1	0	4	1	0	2	0	0	0	1	0	1	0	1	99	0	9	9	9	9	9	0	0			99	99	0	0	295.6	0	301.22	0	0	0	0	Schizotypic personality disorder	2	6	0	0
960	2	1	99	0	3	2	64	0	0	1	4	1	0	2	0	0	0	1	0	1	0	1	99	0	9	9	9	9	9	0	0	2		99	99	0	0	296.36	0	301.6	0	0	0	0	Afhankelijke persoonlijkheids disorder	6	3	0	0
961	1	1	99	0	3	1	49	0	1	0	4	1	0	2	0	0	0	1	0	1	0	2	99	0	9	9	9	9	9	0	0	4		99	99	0	0	296.44	312.9	2262.89	0	0	0	0	Psychotic disorder NAO	2	5	0	0
963	2	1	15	0	1	0	33	1	0	0	5	1	0	1	0	1	0	0	1	1	0	3	1	1	0	0	1	1	1	#NULL!	#NULL!		Lager beroepsonderwijs, lager vormend onderwijs (LBO/VMBO praktijk)	4	0	1	1	296.36	0	2262.89	0	0	0	0	Depress. st. recidiv.vol.remissie	3	3	0	0
964	1	1	20	0	1	1	56	0	1	0	5	1	0	1	0	1	0	0	1	1	0	2	0	1	1	0	0	0	1	0	#NULL!		(M)ULO / MAVO / VMBO theorie	5	1	1	1	296.33	0	301.6	0	0	0	0	Depress. st. recidiv. ern.z.psych	3	3	0	0
965	2	1	23	0	1	1	58	0	1	0	5	1	0	1	0	1	0	0	1	1	0	2	0	1	1	0	0	0	9	#NULL!	#NULL!		Onbekend	99	99	1	1	2262.89	296.36	301.6	301.6	0	0	0	Depress. st. eenm.epi. ern.m.psych.	3	3	0	1
966	2	1	17	0	1	1	48	0	1	0	5	1	0	1	0	1	0	0	1	1	0	1	1	1	0	1	0	0	9	#NULL!	#NULL!		Onbekend	99	99	1	1	296.4	2261.1	2271.09	0	0	0	0	Depressieve st. eenm.epi. matig	3	3	0	0
967	1	1	20	0	1	2	64	0	0	1	5	1	0	1	0	1	0	0	1	1	0	99	0	1	1	0	0	0	1	#NULL!	#NULL!		Lager beroepsonderwijs, lager vormend onderwijs (LBO/VMBO praktijk)	4	0	1	1	296.36	0	2271.09	0	0	0	0	Depress. st. eenm.epi. ern.z.psych.	3	3	0	0
968	1	1	24	0	1	0	24	1	0	0	5	1	0	1	0	1	0	0	1	1	0	1	0	1	1	0	0	0	9	#NULL!	#NULL!		Onbekend	99	99	1	1								Depressieve disorder NAO	3	3	0	1
969	2	1	99	0	1	0	32	1	0	0	5	1	0	1	0	1	0	0	1	1	0	1	99	0	9	9	9	9	9	#NULL!	#NULL!		Onbekend	99	99	99	99	299.8	2262.82	2271.09	0	0	0	0	Syndroom van Rett	9	9	1	0
971	1	1	99	0	1	0	23	1	0	0	5	1	0	1	0	1	0	0	1	1	0	2	99	0	9	9	9	9	1	#NULL!	#NULL!		Basisonderwijs / lagere school	1	0	99	99								Waan disorder	2	6	0	1
972	2	1	8	1	1	1	45	0	1	0	5	1	0	1	0	1	0	0	1	1	0	1	1	1	0	0	1	1	1	1	#NULL!		geen	0	0	1	1	300.4	309.81	799.9	0	0	0	0	Dysthyme disorder	3	3	0	0
973	2	1	24	0	1	1	52	0	1	0	5	1	0	1	0	1	0	0	1	1	0	1	0	1	1	0	0	0	1	#NULL!	#NULL!		Lager beroepsonderwijs, lager vormend onderwijs (LBO/VMBO praktijk)	4	0	1	1	296.22	0	799.9	0	0	0	0	Depressieve st. eenm.epi. matig	3	3	0	0
976	2	1	18	0	1	1	43	0	1	0	5	1	0	1	0	1	0	0	1	1	0	3	1	1	0	1	0	0	9	#NULL!	#NULL!		Onbekend	99	99	1	1	291.89	300.4	301.6	301.82	0	0	0	Stemmings disorder NAO	3	3	0	0
977	2	1	14	0	1	0	34	1	0	0	5	1	0	1	0	1	0	0	1	1	0	1	1	1	0	0	1	1	0	#NULL!	#NULL!		MBO (middelbaar beroepsonderwijs) 3-4 jarig	7	0	1	1	300.4	0	301.9	0	0	0	0	Dysthyme disorder	3	3	0	0
978	2	1	20	0	1	1	47	0	1	0	5	1	0	1	0	1	0	0	1	1	0	2	0	1	1	0	0	0	1	#NULL!	#NULL!		Lager beroepsonderwijs, lager vormend onderwijs (LBO/VMBO praktijk)	4	0	1	1	296.22	0	799.9	0	0	0	0	Depressieve st. eenm.epi. matig	3	3	0	0
980	1	1	22	0	1	1	46	0	1	0	5	1	0	1	0	1	0	0	1	1	0	99	0	1	1	0	0	0	9	#NULL!	#NULL!		Onbekend	99	99	1	1	300.01	0	301.9	0	0	0	0	Paniek disorder zonder agorafobie	4	2	0	0
981	2	1	22	0	1	1	55	0	1	0	5	1	0	1	0	1	0	0	1	1	0	3	0	1	1	0	0	0	0	#NULL!	#NULL!		MBO (middelbaar beroepsonderwijs) 3-4 jarig	7	0	1	1								Depress. st. recidiv. ern.z.psych	3	3	0	1
982	1	1	21	0	1	1	51	0	1	0	5	1	0	1	0	1	0	0	1	1	0	1	0	1	1	0	0	0	0	1	#NULL!		HBO (hoger beroepsonderwijs)	10	0	1	1	295.3	296.33	2271.09	0	0	0	0	schizophrenia, paranoidtype	2	6	0	0
983	1	1	24	0	1	1	43	0	1	0	5	1	0	1	0	1	0	0	1	1	0	2	0	1	1	0	0	0	0	#NULL!	#NULL!		HBO (hoger beroepsonderwijs)	10	0	1	1	299	298.9	2271.09	0	0	0	0	Psychotic disorder NAO	2	5	1	0
984	1	1	13	0	1	1	58	0	1	0	5	1	0	1	0	1	0	0	1	1	0	1	1	1	0	0	1	1	1	#NULL!	#NULL!		Lager beroepsonderwijs, lager vormend onderwijs (LBO/VMBO praktijk)	4	0	1	1	296.9	0	799.9	0	0	0	0	Paniek disorder zonder agorafobie	4	2	0	0
985	2	1	17	0	1	0	29	1	0	0	5	1	0	1	0	1	0	0	1	1	0	1	1	1	0	1	0	0	1	#NULL!	#NULL!		MBO (middelbaar beroepsonderwijs) 2 jarig	4	0	1	1	296.32	309.81	2262.89	0	0	0	0	Depress. st. eenm.epi. ern.z.psych.	3	3	0	0
986	2	1	19	0	1	1	55	0	1	0	5	1	0	1	0	1	0	0	1	1	0	2	1	1	0	1	0	0	1	#NULL!	#NULL!		(M)ULO / MAVO / VMBO theorie	5	1	1	1	296.44	0	2271.09	0	0	0	0	Bipol.I st. mst rct.epi.man.ern.m.p	3	4	0	0
987	1	1	17	0	1	0	32	1	0	0	5	1	0	1	0	1	0	0	1	1	0	99	1	1	0	1	0	0	0	#NULL!	#NULL!		HBO (hoger beroepsonderwijs)	10	0	1	1	296.24	0	2271.09	0	0	0	0	Depress. st. eenm.epi. ern.m.psych.	3	3	0	0
988	2	1	22	0	1	1	58	0	1	0	5	1	0	1	0	1	0	0	1	1	0	2	0	1	1	0	0	0	0	#NULL!	#NULL!		HBO (hoger beroepsonderwijs)	10	0	1	1	296.33	0	2271.09	0	0	0	0	Depressieve st. recidiv.ern.m.psych	3	3	0	0
989	1	1	19	1	1	0	24	1	0	0	5	1	2	1	0	1	0	0	1	1	0	1	1	1	0	1	0	0	1	#NULL!	#NULL!		Lager beroepsonderwijs, lager vormend onderwijs (LBO/VMBO praktijk)	4	0	1	1	295.9	304.3	301.7	0	0	0	0	Schizoaffectieve disorder	2	6	0	0
990	2	1	25	0	1	1	47	0	1	0	5	1	0	1	0	1	0	0	1	1	0	1	0	1	1	0	0	0	0	#NULL!	#NULL!		MBO (middelbaar beroepsonderwijs) 3-4 jarig	7	0	1	1	296.32	296.36	301.6	301.82	0	0	0	Depressieve st. recidiv. matig	3	3	0	0
992	2	1	14	0	1	1	51	0	1	0	5	1	0	1	0	1	0	0	1	1	0	2	1	1	0	0	1	1	1	1	#NULL!		(M)ULO / MAVO / VMBO theorie	5	1	1	1	296.32	0	2262.89	2262.89	0	0	0	Anxiety disorder NAO	4	2	0	0
993	2	1	99	0	1	1	51	0	1	0	5	1	0	1	0	1	0	0	1	1	0	2	99	0	9	9	9	9	1	#NULL!	#NULL!		MBO (middelbaar beroepsonderwijs) 2 jarig	4	0	99	99	296.33	0	301.6	0	0	0	0	Depress. st. recidiv. ern.z.psych	3	3	0	0
994	2	1	17	0	1	1	52	0	1	0	5	1	0	1	0	1	0	0	1	1	0	3	1	1	0	1	0	0	9	#NULL!	#NULL!		Onbekend	99	99	1	1	296.54	0	2271.09	0	0	0	0	Bipol.I st. mst rct.epi.man.ern.z.p	3	4	0	0
995	2	1	23	0	1	0	30	1	0	0	5	1	0	1	0	1	0	0	1	1	0	2	0	1	1	0	0	0	1	#NULL!	#NULL!		(M)ULO / MAVO / VMBO theorie	5	1	1	1	298.9	298.9	301.9	0	0	0	0	Schizofreniforme disorder	2	6	0	0
996	2	1	2	0	1	1	58	0	1	0	5	1	0	1	0	1	0	0	1	1	0	2	1	1	0	0	1	1	1	#NULL!	#NULL!		Basisonderwijs / lagere school	1	0	1	1	298.9	0	317	0	0	0	0	schizophrenia, paranoidtype	2	6	0	0
997	1	1	13	0	1	1	49	0	1	0	5	1	0	1	0	1	0	0	1	1	0	2	1	1	0	0	1	1	1	#NULL!	#NULL!		Lager beroepsonderwijs, lager vormend onderwijs (LBO/VMBO praktijk)	4	0	1	1	312.3	2261.1	301.6	0	0	0	0	Bipol.I st. mst rct.epi.depr.n.gesp	3	4	0	0
998	1	1	19	0	1	1	51	0	1	0	5	1	0	1	0	1	0	0	1	1	0	2	1	1	0	1	0	0	1	#NULL!	#NULL!		Lager beroepsonderwijs, lager vormend onderwijs (LBO/VMBO praktijk)	4	0	1	1	296.89	299	2271.09	0	0	0	0	Bipolaire II disorder	3	4	1	0
999	2	1	99	1	1	1	46	0	1	0	5	1	0	1	0	1	0	0	1	1	0	3	99	0	9	9	9	9	1	0	#NULL!		Basisonderwijs / lagere school	1	0	99	99	296.44	0	2271.09	0	0	0	0	Bipol.I st. mst rct.epi.man.ern.z.p	3	4	0	0
1000	1	1	26	0	1	0	32	1	0	0	5	1	0	1	0	1	0	0	1	1	0	1	0	1	1	0	0	0	0	#NULL!	#NULL!		MBO (middelbaar beroepsonderwijs) 3-4 jarig	7	0	1	1	295.9	309.9	301	0	0	0	0	schizophrenia, ongedifferent. type	2	6	0	0
1001	2	1	20	0	1	1	49	0	1	0	5	1	0	1	0	1	0	0	1	1	0	1	0	1	1	0	0	0	1	#NULL!	#NULL!		Geen	0	0	1	1	2262.81	300.3	301.6	0	0	0	0	Gegeneraliseerde angst disorder	4	2	0	1
1002	2	1	18	0	1	1	38	0	1	0	5	1	0	1	0	1	0	0	1	1	0	1	1	1	0	1	0	0	0	#NULL!	#NULL!		HBO (hoger beroepsonderwijs)	10	0	1	1	298.9	296.22	301.6	0	0	0	0	Psychotic disorder NAO	2	5	0	0
1003	1	1	99	0	1	1	39	0	1	0	5	1	0	1	0	1	0	0	1	1	0	1	99	0	9	9	9	9	1	#NULL!	#NULL!		(M)ULO / MAVO / VMBO theorie	5	1	99	99	295.3	296.36	2271.09	0	0	0	0	schizophrenia, paranoidtype	2	6	0	0
1004	1	1	18	0	1	1	53	0	1	0	5	1	0	1	0	1	0	0	1	1	0	1	1	1	0	1	0	0	9	#NULL!	#NULL!		Onbekend	99	99	1	1	295.3	300.3	2271.09	0	0	0	0	schizophrenia, paranoidtype	2	6	0	0
1005	2	1	24	0	1	0	23	1	0	0	5	1	0	1	0	1	0	0	1	1	0	1	0	1	1	0	0	0	0	#NULL!	#NULL!		VWO / HBS / Gymnasium / Atheneum	9	0	1	1	296.24	0	799.9	0	0	0	0	Depressieve st. eenm.epi. n.gespec.	3	3	0	0
1007	2	1	19	1	1	1	51	0	1	0	5	1	0	1	0	1	0	0	1	1	0	2	1	1	0	1	0	0	9	#NULL!	#NULL!		Onbekend	99	99	1	1	300.01	309.81	2271.09	0	0	0	0	Paniek disorder zonder agorafobie	4	2	0	0
1008	1	1	8	0	1	1	45	0	1	0	5	1	0	1	0	1	0	0	1	1	0	1	1	1	0	0	1	1	9	#NULL!	#NULL!		Onbekend	99	99	1	1	293.9	0	2262.89	0	0	0	0	Psychische st. NAO ..v.som.aand.	2	5	0	0
1009	2	1	15	0	1	1	43	0	1	0	5	1	0	1	0	1	0	0	1	1	0	2	1	1	0	0	1	1	1	#NULL!	#NULL!		Lager beroepsonderwijs, lager vormend onderwijs (LBO/VMBO praktijk)	4	0	1	1	298.9	0	301.9	0	0	0	0	Psychotic disorder NAO	2	5	0	0
1010	1	1	26	0	1	1	38	0	1	0	5	1	0	1	0	1	0	0	1	1	0	3	0	1	1	0	0	0	9	#NULL!	#NULL!		Onbekend	99	99	1	1	296.26	0	301.9	0	0	0	0	Depress. st. eenm.epi. ern.z.psych.	3	3	0	0
1011	1	1	23	0	1	1	37	0	1	0	5	1	0	1	0	1	0	0	1	1	0	1	0	1	1	0	0	0	0	#NULL!	#NULL!		MBO (middelbaar beroepsonderwijs) 3-4 jarig	7	0	1	1	298.9	309.81	799.9	0	0	0	0	Psychotic disorder NAO	2	5	0	0
1012	2	1	25	0	1	2	62	0	0	1	5	1	0	1	0	1	0	0	1	1	0	3	0	1	1	0	0	0	1	#NULL!	#NULL!		(M)ULO / MAVO / VMBO theorie	5	1	1	1	296.3	300.02	301.82	301.82	0	0	0	Depress. st. recidiv.ged.remissie	3	3	0	0
1013	1	1	20	0	1	1	48	0	1	0	5	1	0	1	0	1	0	0	1	1	0	2	0	1	1	0	0	0	9	#NULL!	#NULL!		Onbekend	99	99	99	99	299	296.23	301.9	0	0	0	0	disorder impulsbeheersing NAO	0	1	1	0
1014	2	1	22	0	1	1	53	0	1	0	5	1	0	1	0	1	0	0	1	1	0	4	0	1	1	0	0	0	9	#NULL!	#NULL!		Onbekend	99	99	1	1								Psychotic disorder NAO	2	5	0	1
1015	1	1	99	0	1	1	58	0	1	0	5	1	0	1	0	1	0	0	1	1	0	2	99	0	9	9	9	9	9	#NULL!	#NULL!		Onbekend	99	99	99	99	296.33	300.02	301.9	0	0	0	0	Depress. st. eenm.epi. ern.z.psych.	3	3	0	0
1016	2	1	16	0	1	0	32	1	0	0	5	1	0	1	0	1	0	0	1	1	0	3	1	1	0	1	0	0	1	#NULL!	#NULL!		(M)ULO / MAVO / VMBO theorie	5	1	1	1	307.5	314.9	301.83	0	0	0	0	Eet disorder NAO	4	10	1	0
1017	2	1	24	0	1	1	49	0	1	0	5	1	0	1	0	1	0	0	1	1	0	2	0	1	1	0	0	0	1	#NULL!	#NULL!		(M)ULO / MAVO / VMBO theorie	5	1	1	1	296.36	0	301.4	0	0	0	0	Depressieve st. recidiv. n.gespe	3	3	0	0
1018	1	1	18	0	1	1	45	0	1	0	5	1	0	1	0	1	0	0	1	1	0	1	1	1	0	1	0	0	0	#NULL!	#NULL!		VWO / HBS / Gymnasium / Atheneum	9	0	1	1	296.44	0	2271.09	0	0	0	0	Bipol.I st. mst rct.epi.man.matig	3	4	0	0
1019	2	1	99	1	1	1	42	0	1	0	5	1	0	1	0	1	0	0	1	1	0	1	99	0	9	9	9	9	9	#NULL!	#NULL!		Onbekend	99	99	99	99	298.9	0	2271.09	0	0	0	0	Psychotic disorder NAO	2	5	0	0
1020	2	1	21	0	1	1	47	0	1	0	5	1	0	1	0	1	0	0	1	1	0	2	0	1	1	0	0	0	0	#NULL!	#NULL!		Wetenschappelijk onderwijs (master)	11	0	1	1	295.9	303.9	2271.09	0	0	0	0	schizophrenia, ongedifferent. type	2	6	0	0
1021	1	1	20	0	1	1	52	0	1	0	5	1	0	1	0	1	0	0	1	1	0	1	0	1	1	0	0	0	0	#NULL!	#NULL!		MBO (middelbaar beroepsonderwijs) 3-4 jarig	7	0	1	1	296.36	300.02	301.9	0	0	0	0	Depress. st. recidiv.ged.remissie	3	3	0	0
1022	1	1	17	1	1	0	26	1	0	0	5	1	2	1	0	1	0	0	1	1	0	1	1	1	0	1	0	0	1	#NULL!	#NULL!		Lager beroepsonderwijs, lager vormend onderwijs (LBO/VMBO praktijk)	4	0	1	1	295.9	304.3	2271.09	0	0	0	0	Psychotic disorder NAO	2	5	0	0
1023	2	1	14	0	1	1	52	0	1	0	5	1	0	1	0	1	0	0	1	1	0	99	1	1	0	0	1	1	1	#NULL!	#NULL!		(M)ULO / MAVO / VMBO theorie	5	1	1	1	296.43	0	799.9	0	0	0	0	Bipol.I st. mst rct.epi.man.matig	3	4	0	0
1024	1	1	18	0	1	1	42	0	1	0	5	1	0	1	0	1	0	0	1	1	0	1	1	1	0	1	0	0	1	#NULL!	#NULL!		(M)ULO / MAVO / VMBO theorie	5	1	1	1	295.3	305.7	301.9	0	0	0	0	schizophrenia, paranoidtype	2	6	0	0
1025	1	1	21	0	1	1	41	0	1	0	5	1	0	1	0	1	0	0	1	1	0	1	0	1	1	0	0	0	0	#NULL!	#NULL!		HBO (hoger beroepsonderwijs)	10	0	1	1								Parafilie NAO	4	2	0	1
1026	2	1	25	0	1	0	29	1	0	0	5	1	0	1	0	1	0	0	1	1	0	1	0	1	1	0	0	0	9	#NULL!	#NULL!		Onbekend	99	99	1	1	299.8	307.5	2271.09	0	0	0	0	Syndroom van Rett	9	9	1	0
1027	1	1	20	0	1	1	48	0	1	0	5	1	0	1	0	1	0	0	1	1	0	1	0	1	1	0	0	0	1	#NULL!	#NULL!		Lager beroepsonderwijs, lager vormend onderwijs (LBO/VMBO praktijk)	4	0	1	1	299	296.33	2262.89	0	0	0	0	Psychotic disorder NAO	2	5	1	0
1028	2	1	99	0	1	1	47	0	1	0	5	1	0	1	0	1	0	0	1	1	0	1	99	0	9	9	9	9	9	#NULL!	#NULL!		Onbekend	99	99	99	99	296.33	298.9	301.6	301.6	0	0	0	Psychotic disorder NAO	2	5	0	0
1029	1	1	17	0	1	1	49	0	1	0	5	1	2	1	0	1	0	0	1	1	0	1	1	1	0	1	0	0	1	0	#NULL!		Lager beroepsonderwijs, lager vormend onderwijs (LBO/VMBO praktijk)	4	0	1	1	295.7	298.9	2271.09	0	0	0	0	Schizoaffectieve disorder	2	6	0	0
1030	2	1	16	0	1	0	24	1	0	0	5	1	2	1	0	1	0	0	1	1	0	1	1	1	0	1	0	0	1	#NULL!	#NULL!		Geen	0	0	1	1	299	312.9	301.83	0	0	0	0	Psychotic disorder NAO	2	5	1	0
1031	1	1	18	0	1	1	55	0	1	0	5	1	0	1	0	1	0	0	1	1	0	4	1	1	0	1	0	0	0	#NULL!	#NULL!		MBO (middelbaar beroepsonderwijs) 3-4 jarig	7	0	1	1	296.52	2261.1	301.6	0	0	0	0	Bipol.I st. mst rct.epi.man.ern.m.p	3	4	0	0
1032	2	1	20	1	1	1	51	0	1	0	5	1	0	1	0	1	0	0	1	1	0	1	0	1	1	0	0	0	0	#NULL!	#NULL!		Wetenschappelijk onderwijs (master)	11	0	1	1	295.7	296.4	2271.09	0	0	0	0	Bipol.I st. mst rct.epi.man.ern.z.p	3	4	0	0
1033	1	1	99	0	1	1	50	0	1	0	5	1	0	1	0	1	0	0	1	1	0	99	99	0	9	9	9	9	1	#NULL!	#NULL!		Lager beroepsonderwijs, lager vormend onderwijs (LBO/VMBO praktijk)	4	0	99	99	296.32	303.9	799.9	301.9	0	0	0	Alcoholafhankelijkheid	1	3	0	0
1034	1	1	19	0	1	0	34	1	0	0	5	1	0	1	0	1	0	0	1	1	0	2	1	1	0	1	0	0	9	#NULL!	#NULL!		Onbekend	99	99	1	1	298.9	314.01	2271.09	0	0	0	0	Psychotic disorder NAO	2	5	1	0
1035	1	1	99	0	1	1	54	0	1	0	5	1	0	1	0	1	0	0	1	1	0	1	99	0	9	9	9	9	1	#NULL!	#NULL!		MBO (middelbaar beroepsonderwijs) 2 jarig	4	0	99	99	303.9	303.9	301.9	0	0	0	0	Afhankelijkheid v.verschil.middelen	1	8	0	0
1036	1	1	99	0	1	1	37	0	1	0	5	1	0	1	0	1	0	0	1	1	0	2	99	0	9	9	9	9	9	#NULL!	#NULL!		Onbekend	99	99	99	99								Acute stress- disorder	4	2	0	1
1037	2	1	99	0	1	0	33	1	0	0	5	1	0	1	0	1	0	0	1	1	0	2	99	0	9	9	9	9	1	#NULL!	#NULL!		(M)ULO / MAVO / VMBO theorie	5	1	99	99	296.22	313.82	2271.09	0	0	0	0	Depressieve st. eenm.epi. matig	3	3	0	0
1038	2	1	18	0	1	0	35	1	0	0	5	1	0	1	0	1	0	0	1	1	0	1	1	1	0	1	0	0	1	#NULL!	#NULL!		Lager beroepsonderwijs, lager vormend onderwijs (LBO/VMBO praktijk)	4	0	1	1	300.21	309.81	799.9	0	0	0	0	Paniek disorder met agorafobie	4	2	0	0
1039	2	1	99	0	1	1	36	0	1	0	5	1	0	1	0	1	0	0	1	1	0	1	99	0	9	9	9	9	9	#NULL!	#NULL!		Onbekend	99	99	99	99	298.9	314.01	301.9	0	0	0	0	Psychotic disorder NAO	2	5	1	0
1040	2	1	99	0	1	1	55	0	1	0	5	1	0	1	0	1	0	0	1	1	0	2	99	0	9	9	9	9	9	#NULL!	#NULL!		Onbekend	99	99	99	99	300	2262.81	799.9	0	0	0	0	Depress. st. recidiv. ern.z.psych	3	3	0	0
1041	1	1	27	0	1	0	33	1	0	0	5	1	0	1	0	1	0	0	1	1	0	1	0	1	1	0	0	0	0	1	#NULL!		MBO (middelbaar beroepsonderwijs) 3-4 jarig	7	0	1	1	296.43	0	301.7	301.81	0	0	0	Bipol.I st. mst rct.epi.man.ern.m.p	3	4	0	0
1042	1	1	15	1	1	0	34	1	0	0	5	1	0	1	0	1	0	0	1	1	0	2	1	1	0	0	1	1	9	#NULL!	#NULL!		Onbekend	99	99	1	1	296.33	0	301.6	301.82	0	0	0	Depress. st. recidiv. ern.z.psych	3	3	0	0
1043	2	1	7	0	1	1	56	0	1	0	5	1	2	1	0	1	0	0	1	1	0	4	1	1	0	0	1	1	1	#NULL!	#NULL!		Lager beroepsonderwijs, lager vormend onderwijs (LBO/VMBO praktijk)	4	0	1	1	293.82	296.32	301.83	301.83	0	0	0	Katatone st. door ...v.som.aand.	2	5	0	0
1044	2	1	14	0	1	1	54	0	1	0	5	1	0	1	0	1	0	0	1	1	0	99	1	1	0	0	1	1	9	#NULL!	#NULL!		Onbekend	99	99	1	1	296.36	296.36	301.9	301.6	0	0	0	Depressieve st. recidiv. matig	3	3	0	0
1045	2	1	27	0	1	1	46	0	1	0	5	1	0	1	0	1	0	0	1	1	0	1	0	1	1	0	0	0	0	#NULL!	#NULL!		MBO (middelbaar beroepsonderwijs) 3-4 jarig	7	0	1	1	309.81	296.32	301.9	0	0	0	0	Depressieve st. recidiv. matig	3	3	0	0
1046	2	1	21	0	1	0	31	1	0	0	5	1	0	1	0	1	0	0	1	1	0	1	0	1	1	0	0	0	9	#NULL!	#NULL!		Onbekend	99	99	1	1	296.36	0	301.83	301.4	0	0	0	Depress. st. recidiv. ern.z.psych	3	3	0	0
1047	2	1	26	0	1	0	34	1	0	0	5	1	0	1	0	1	0	0	1	1	0	2	0	1	1	0	0	0	0	#NULL!	#NULL!		Wetenschappelijk onderwijs (master)	11	0	1	1	298.9	296.26	301.9	301.82	0	0	0	Depress. st. recidiv. ern.z.psych	3	3	0	0
1048	2	1	24	0	1	1	46	0	1	0	5	1	0	1	0	1	0	0	1	1	0	2	0	1	1	0	0	0	1	#NULL!	#NULL!		(M)ULO / MAVO / VMBO theorie	5	1	1	1	309.81	296.36	301.82	301.83	0	0	0	Posttraumatic stress- disorder	4	11	0	0
1049	2	1	14	0	1	1	49	0	1	0	5	1	2	1	0	1	0	0	1	1	0	2	1	1	0	0	1	1	0	#NULL!	#NULL!		MBO (middelbaar beroepsonderwijs) 3-4 jarig	7	0	1	1	309	300	301.83	301.83	0	0	0	Depress. st. recidiv. ern.z.psych	3	3	0	0
1050	2	1	17	0	1	1	36	0	1	0	5	1	0	1	0	1	0	0	1	1	0	1	1	1	0	1	0	0	1	#NULL!	#NULL!		(M)ULO / MAVO / VMBO theorie	5	1	1	1	299.8	311	301.83	0	0	0	0	Syndroom van Rett	9	9	1	0
1051	1	1	21	0	1	0	28	1	0	0	5	1	0	1	0	1	0	0	1	1	0	1	0	1	1	0	0	0	1	#NULL!	#NULL!		(M)ULO / MAVO / VMBO theorie	5	1	1	1	295.7	0	2271.09	0	0	0	0	Schizoaffectieve disorder	2	6	0	0
1052	2	1	25	0	1	0	33	1	0	0	5	1	0	1	0	1	0	0	1	1	0	1	0	1	1	0	0	0	1	#NULL!	#NULL!		MBO (middelbaar beroepsonderwijs) 2 jarig	4	0	1	1	309.81	309.81	301.83	0	0	0	0	Posttraumatic stress- disorder	4	11	0	0
1053	2	1	18	0	1	1	56	0	1	0	5	1	0	1	0	1	0	0	1	1	0	3	1	1	0	1	0	0	1	#NULL!	#NULL!		(M)ULO / MAVO / VMBO theorie	5	1	1	1	309.81	296.33	301.83	301.83	0	0	0	Depress. st. recidiv. ern.z.psych	3	3	0	0
1054	2	1	17	0	1	2	65	0	0	1	5	1	0	1	0	1	0	0	1	1	0	2	1	1	0	1	0	0	9	#NULL!	#NULL!		Onbekend	99	99	1	1	296.43	2261.1	2271.09	0	0	0	0	Bipol.I st. mst rct.epi.man.matig	3	4	0	0
1055	1	1	27	0	1	1	49	0	1	0	5	1	0	1	0	1	0	0	1	1	0	1	0	1	1	0	0	0	0	#NULL!	#NULL!		Wetenschappelijk onderwijs (master)	11	0	1	1	296.8	300.15	2271.09	0	0	0	0	Bipol.I st. mst rct.epi.dep.ern.m.p	3	4	0	0
1056	1	1	21	0	1	1	51	0	1	0	5	1	1	1	0	1	0	0	1	1	0	2	0	1	1	0	0	0	1	#NULL!	#NULL!		(M)ULO / MAVO / VMBO theorie	5	1	1	1	296.33	307.45	2271.09	0	0	0	0	Bipolaire II disorder	3	4	0	0
1057	2	1	22	0	1	1	41	0	1	0	5	1	0	1	0	1	0	0	1	1	0	2	0	1	1	0	0	0	9	#NULL!	#NULL!		Onbekend	99	99	1	1	311	0	301.83	0	0	0	0	Depressieve disorder NAO	3	3	0	0
1058	2	1	25	0	1	1	49	0	1	0	5	1	0	1	0	1	0	0	1	1	0	2	0	1	1	0	0	0	0	1	#NULL!		MBO (middelbaar beroepsonderwijs) 3-4 jarig	7	0	1	1	296.89	0	799.9	0	0	0	0	Depressieve disorder NAO	3	3	0	0
1060	2	1	13	0	1	0	30	1	0	0	5	1	0	1	0	1	0	0	1	1	0	1	1	1	0	0	1	1	1	#NULL!	#NULL!		MBO (middelbaar beroepsonderwijs) 2 jarig	4	0	1	1	312.9	295.7	301.83	301.83	0	0	0	Schizoaffectieve disorder	2	6	1	0
1061	2	1	25	0	1	1	37	0	1	0	5	1	0	1	0	1	0	0	1	1	0	3	0	1	1	0	0	0	0	#NULL!	#NULL!		MBO (middelbaar beroepsonderwijs) 3-4 jarig	7	0	1	1	309.81	296.32	799.9	0	0	0	0	Posttraumatic stress- disorder	4	11	0	0
1062	1	1	19	0	1	1	49	0	1	0	5	1	0	1	0	1	0	0	1	1	0	2	1	1	0	1	0	0	1	#NULL!	#NULL!		Geen	0	0	1	1	296.36	0	2262.89	0	0	0	0	disorder impulsbeheersing NAO	0	1	0	0
1063	2	1	24	0	1	1	50	0	1	0	5	1	0	1	0	1	0	0	1	1	0	4	0	1	1	0	0	0	0	1	#NULL!		HBO (hoger beroepsonderwijs)	10	0	1	1	295.7	2261.2	301.83	0	0	0	0	Schizoaffectieve disorder	2	6	0	0
1064	1	1	19	0	1	0	27	1	0	0	5	1	0	1	0	1	0	0	1	1	0	1	1	1	0	1	0	0	1	1	#NULL!		MBO (middelbaar beroepsonderwijs) 2 jarig	4	0	1	1	299	296.24	2271.09	0	0	0	0	Autistische disorder	9	9	1	0
1065	1	1	24	0	1	0	30	1	0	0	5	1	0	1	0	1	0	0	1	1	0	1	0	1	1	0	0	0	1	#NULL!	#NULL!		MBO (middelbaar beroepsonderwijs) 2 jarig	4	0	1	1	296.44				0	0	0	Bipol.I st. mst rct.epi.man.ern.m.p	3	4	0	0
1066	1	1	17	0	1	1	45	0	1	0	5	1	0	1	0	1	0	0	1	1	0	1	1	1	0	1	0	0	9	#NULL!	#NULL!		Onbekend	99	99	1	1	296.33	309.81	301	0	0	0	0	Depress. st. recidiv. ern.z.psych	3	3	0	0
1067	1	1	19	0	1	0	26	1	0	0	5	1	0	1	0	1	0	0	1	1	0	1	1	1	0	1	0	0	1	#NULL!	#NULL!		Lager beroepsonderwijs, lager vormend onderwijs (LBO/VMBO praktijk)	4	0	1	1	293.89	298.9	301.9	0	0	0	0	Depressieve disorder NAO	3	3	0	0
1068	1	1	20	0	1	1	54	0	1	0	5	1	0	1	0	1	0	0	1	1	0	1	0	1	1	0	0	0	1	#NULL!	#NULL!		(M)ULO / MAVO / VMBO theorie	5	1	1	1	296.33	299	301.82	0	0	0	0	Depress. st. recidiv. ern.z.psych	3	3	1	0
1069	2	1	22	0	1	1	39	0	1	0	5	1	0	1	0	1	0	0	1	1	0	1	0	1	1	0	0	0	9	#NULL!	#NULL!		Onbekend	99	99	1	1	296.54	298.8	2271.09	0	0	0	0	Bipol.I st. mst rct.epi.gem.n.gespe	3	4	0	0
1070	2	1	25	0	1	0	28	1	0	0	5	1	0	1	0	1	0	0	1	1	0	2	0	1	1	0	0	0	1	#NULL!	#NULL!		(M)ULO / MAVO / VMBO theorie	5	1	1	1	300.4	0	301.4	301.82	0	0	0	Depressieve st. eenm.epi. matig	3	3	0	0
1071	2	1	24	0	1	1	47	0	1	0	5	1	0	1	0	1	0	0	1	1	0	2	0	1	1	0	0	0	9	#NULL!	#NULL!		Onbekend	99	99	1	1	296.33	0	301.83	0	0	0	0	Depress. st. recidiv. ern.z.psych	3	3	0	0
1072	2	1	20	0	1	1	53	0	1	0	5	1	0	1	0	1	0	0	1	1	0	5	0	1	1	0	0	0	1	#NULL!	#NULL!		Lager beroepsonderwijs, lager vormend onderwijs (LBO/VMBO praktijk)	4	0	1	1	296.54	0	2271.09	0	0	0	0	Bipol.I st. mst rct.epi.dep.ern.z.p	3	4	0	0
1073	2	1	19	0	1	2	60	0	0	1	5	1	0	1	0	1	0	0	1	1	0	2	1	1	0	1	0	0	9	#NULL!	#NULL!		Onbekend	99	99	1	1	300.01	296.33	301.82	0	0	0	0	Paniek disorder zonder agorafobie	4	2	0	0
1074	1	1	27	0	1	1	55	0	1	0	5	1	0	1	0	1	0	0	1	1	0	2	0	1	1	0	0	0	1	#NULL!	#NULL!		Lager beroepsonderwijs, lager vormend onderwijs (LBO/VMBO praktijk)	4	0	1	1	296.22	2261.9	2271.09	0	0	0	0	Depress. st. recidiv. ern.z.psych	3	3	0	0
1075	2	1	20	0	1	0	35	1	0	0	5	1	0	1	0	1	0	0	1	1	0	2	0	1	1	0	0	0	0	#NULL!	#NULL!		MBO (middelbaar beroepsonderwijs) 3-4 jarig	7	0	1	1	300.3	300	799.9	0	0	0	0	Psychotic disorder NAO	2	5	0	0
1076	1	1	25	0	1	1	43	0	1	0	5	1	0	1	0	1	0	0	1	1	0	2	0	1	1	0	0	0	1	#NULL!	#NULL!		Lager beroepsonderwijs, lager vormend onderwijs (LBO/VMBO praktijk)	4	0	1	1	299	305	2271.09	0	0	0	0	Autistische disorder	9	9	1	0
1077	1	1	16	0	1	1	49	0	1	0	5	1	0	1	0	1	0	0	1	1	0	1	1	1	0	1	0	0	1	#NULL!	#NULL!		(M)ULO / MAVO / VMBO theorie	5	1	1	1	296.4	303.9	301.9	0	0	0	0	Bipol.I st. mst rct.epi.man.matig	3	4	0	0
1078	1	1	22	0	1	1	48	0	1	0	5	1	0	1	0	1	0	0	1	1	0	2	0	1	1	0	0	0	0	#NULL!	#NULL!		MBO (middelbaar beroepsonderwijs) 3-4 jarig	7	0	1	1	297.1	303.9	2271.09	0	0	0	0	Stemmings disorder NAO	3	3	0	0
1079	1	1	27	0	1	0	24	1	0	0	5	1	0	1	0	1	0	0	1	1	0	1	0	1	1	0	0	0	1	#NULL!	#NULL!		MBO (middelbaar beroepsonderwijs) 2 jarig	4	0	1	1	2215.81	296.36	301.9	301.82	0	0	0	Syndroom van Rett	9	9	1	1
1080	2	1	23	0	1	1	43	0	1	0	5	1	0	1	0	1	0	0	1	1	0	1	0	1	1	0	0	0	1	#NULL!	#NULL!		(M)ULO / MAVO / VMBO theorie	5	1	1	1	295.7	300.3	301.83	0	0	0	0	Obsessieve-compulsieve disorder	4	2	0	0
1081	2	1	13	0	1	2	65	0	0	1	5	1	0	1	0	1	0	0	1	1	0	2	1	1	0	0	1	1	1	#NULL!	#NULL!		Lager beroepsonderwijs, lager vormend onderwijs (LBO/VMBO praktijk)	4	0	1	1	296.33	294.8	301.82	0	0	0	0	Depressieve st. recidiv. licht	3	3	0	0
1082	1	1	22	0	1	0	31	1	0	0	5	1	0	1	0	1	0	0	1	1	0	1	0	1	1	0	0	0	1	#NULL!	#NULL!		(M)ULO / MAVO / VMBO theorie	5	1	1	1	295.9	304.3	799.9	0	0	0	0	Psychotic disorder NAO	2	5	0	0
1083	2	1	19	0	1	0	21	1	0	0	5	1	0	1	0	1	0	0	1	1	0	1	1	1	0	1	0	0	0	#NULL!	#NULL!		MBO (middelbaar beroepsonderwijs) 3-4 jarig	7	0	1	1	298.8	307.5	301.83	0	0	0	0	Eet disorder NAO	4	10	0	0
1084	2	1	22	0	1	1	48	0	1	0	5	1	0	1	0	1	0	0	1	1	0	3	0	1	1	0	0	0	0	#NULL!	#NULL!		MBO (middelbaar beroepsonderwijs) 3-4 jarig	7	0	1	1	780.59	298.9	301.83	301.83	0	0	0	,000	2	5	0	0
1085	2	1	14	0	1	1	48	0	1	0	5	1	0	1	0	1	0	0	1	1	0	2	1	1	0	0	1	1	1	#NULL!	#NULL!		MBO (middelbaar beroepsonderwijs) 2 jarig	4	0	1	1	296.43	2261.1	799.9	0	0	0	0	Bipol.I st. mst rct.epi.man.ern.m.p	3	4	0	0
1086	2	1	25	0	1	0	26	1	0	0	5	1	0	1	0	1	0	0	1	1	0	5	0	1	1	0	0	0	0	#NULL!	#NULL!		HBO (hoger beroepsonderwijs)	10	0	1	1	309.81	296.34	301.82	0	0	0	0	Posttraumatic stress- disorder	4	11	0	0
1087	1	1	26	0	1	1	52	0	1	0	5	1	0	1	0	1	0	0	1	1	0	2	0	1	1	0	0	0	1	#NULL!	#NULL!		(M)ULO / MAVO / VMBO theorie	5	1	1	1	296.36	296.36	301.9	301.6	0	0	0	Depressieve st. recidiv.ern.m.psych	3	3	0	0
1088	1	1	17	0	1	1	48	0	1	0	5	1	0	1	0	1	0	0	1	1	0	1	1	1	0	1	0	0	9	#NULL!	#NULL!		Onbekend	99	99	1	1	295.7	0	799.9	0	0	0	0	Schizoaffectieve disorder	2	6	0	0
1089	1	1	23	0	1	1	49	0	1	0	5	1	0	1	0	1	0	0	1	1	0	1	0	1	1	0	0	0	0	#NULL!	#NULL!		HBO (hoger beroepsonderwijs)	10	0	1	1	298.9	303.9	2271.09	0	0	0	0	Psychotic disorder NAO	2	5	0	0
1090	2	1	20	0	1	0	32	1	0	0	5	1	0	1	0	1	0	0	1	1	0	1	0	1	1	0	0	0	1	0	#NULL!		Lager beroepsonderwijs, lager vormend onderwijs (LBO/VMBO praktijk)	4	0	1	1	300.19	309.81	301.83	301.83	0	0	0	Posttraumatic stress- disorder	4	11	0	1
1091	1	1	25	0	1	1	47	0	1	0	5	1	0	1	0	1	0	0	1	1	0	2	0	1	1	0	0	0	1	#NULL!	#NULL!		Lager beroepsonderwijs, lager vormend onderwijs (LBO/VMBO praktijk)	4	0	1	1	2261.1	296.53	301.4	301.6	0	0	0	19,030	2	5	0	1
1092	2	1	7	0	1	1	46	0	1	0	5	1	0	1	0	1	0	0	1	1	0	1	1	1	0	0	1	1	1	#NULL!	#NULL!		Geen	0	1	1	1	309.81	0	2262.89	0	0	0	0	Posttraumatic stress- disorder	4	11	0	0
1093	2	1	21	0	1	1	46	0	1	0	5	1	0	1	0	1	0	0	1	1	0	5	0	1	1	0	0	0	1	#NULL!	#NULL!		(M)ULO / MAVO / VMBO theorie	5	1	1	1	296.36	302.72	301.83	301.82	0	0	0	Depress. st. recidiv.ged.remissie	3	3	0	0
1094	1	1	17	0	1	1	52	0	1	0	5	1	0	1	0	1	0	0	1	1	0	2	1	1	0	1	0	0	9	#NULL!	#NULL!		Onbekend	99	99	1	1	295.9	295.7	2271.09	0	0	0	0	schizophrenia, ongedifferent. type	2	6	0	0
1095	1	1	18	0	1	2	64	0	0	1	5	1	0	1	0	1	0	0	1	1	0	1	1	1	0	1	0	0	1	#NULL!	#NULL!		Lager beroepsonderwijs, lager vormend onderwijs (LBO/VMBO praktijk)	4	0	1	1	300.3	0	2271.09	0	0	0	0	Obsessieve-compulsieve disorder	4	2	0	0
1096	2	1	25	0	1	1	56	0	1	0	5	1	0	1	0	1	0	0	1	1	0	1	0	1	1	0	0	0	0	1	#NULL!		HAVO	8	0	1	1	309.81	296.36	2271.09	0	0	0	0	Aanpassings disorder n.gespecific.	3	3	0	0
1097	2	1	19	0	1	1	37	0	1	0	5	1	0	1	0	1	0	0	1	1	0	1	1	1	0	1	0	0	0	#NULL!	#NULL!		MBO (middelbaar beroepsonderwijs) 3-4 jarig	7	0	1	1	296	300.81	301.83	301.82	0	0	0	Bipolaire I st. eenm.man.epi. matig	3	4	0	0
1098	2	1	28	0	1	1	48	0	1	0	5	1	0	1	0	1	0	0	1	1	0	2	0	1	1	0	0	0	0	#NULL!	#NULL!		Wetenschappelijk onderwijs (master)	11	0	1	1	296.43	0	2271.09	0	0	0	0	Bipol. I st. eenm.man.epi.ern.z.psy	3	4	0	0
1100	1	1	20	0	1	1	47	0	1	0	5	1	0	1	0	1	0	0	1	1	0	2	0	1	1	0	0	0	9	#NULL!	#NULL!		Onbekend	99	99	1	1	295.9	295.3	799.9	0	0	0	0	schizophrenia, paranoidtype	2	6	0	0
1101	1	1	24	0	1	0	28	1	0	0	5	1	0	1	0	1	0	0	1	1	0	1	0	1	1	0	0	0	0	#NULL!	#NULL!		HBO (hoger beroepsonderwijs)	10	0	1	1	295.7	304.3	2271.09	0	0	0	0	Schizoaffectieve disorder	2	6	0	0
1102	1	1	27	0	1	0	28	1	0	0	5	1	0	1	0	1	0	0	1	1	0	1	0	1	1	0	0	0	0	#NULL!	#NULL!		HBO (hoger beroepsonderwijs)	10	0	1	1	300.19	299	301.9	0	0	0	0	Psychotic disorder NAO	2	5	1	1
1103	1	1	25	0	1	1	43	0	1	0	5	1	0	1	0	1	0	0	1	1	0	3	0	1	1	0	0	0	1	#NULL!	#NULL!		Geen	0	0	1	1	296.32	2261.1	2271.09	0	0	0	0	Depressieve st. recidiv. matig	3	3	0	0
1104	1	1	26	0	1	1	45	0	1	0	5	1	0	1	0	1	0	0	1	1	0	5	0	1	1	0	0	0	0	#NULL!	#NULL!		MBO (middelbaar beroepsonderwijs) 3-4 jarig	7	0	1	1	296.26	0	301.9	0	0	0	0	Depressieve st. recidiv. matig	3	3	0	0
1105	2	1	24	0	1	1	38	0	1	0	5	1	0	1	0	1	0	0	1	1	0	2	0	1	1	0	0	0	1	#NULL!	#NULL!		(M)ULO / MAVO / VMBO theorie	5	1	1	1	296.32	309.81	301.6	301.82	0	0	0	Depress. st. eenm.epi. ern.z.psych.	3	3	0	0
1106	1	1	27	0	1	1	47	0	1	0	5	1	0	1	0	1	0	0	1	1	0	2	0	1	1	0	0	0	0	#NULL!	#NULL!		HBO (hoger beroepsonderwijs)	10	0	1	1	296.3	312.3	301.9	0	0	0	0	Depressieve st. recidiv. n.gespe	3	3	0	0
1108	2	1	27	0	1	1	45	0	1	0	5	1	1	1	0	1	0	0	1	1	0	2	0	1	1	0	0	0	0	1	#NULL!		MBO (middelbaar beroepsonderwijs) 3-4 jarig	7	0	1	1	296.33	300	301.9	301.9	0	0	0	Depress. st. recidiv. ern.z.psych	3	3	0	0
1109	1	1	24	0	1	1	45	0	1	0	5	1	0	1	0	1	0	0	1	1	0	2	0	1	1	0	0	0	1	#NULL!	#NULL!		MBO (middelbaar beroepsonderwijs) 2 jarig	4	0	1	1	295.3	0	799.9	0	0	0	0	schizophrenia, paranoidtype	2	6	0	0
1110	2	1	99	0	1	1	40	0	1	0	5	1	0	1	0	1	0	0	1	1	0	2	99	0	9	9	9	9	1	1	#NULL!		(M)ULO / MAVO / VMBO theorie	5	1	99	99	296.3	298.9	301.6	0	0	0	0	Depressieve st. recidiv. n.gespe	3	3	0	0
1111	2	1	99	0	1	2	63	0	0	1	5	1	0	1	0	1	0	0	1	1	0	2	99	0	9	9	9	9	9	#NULL!	#NULL!		Onbekend	99	99	99	99	296.66	0	301.9	0	0	0	0	Bipol.I st. mst rct.epi.gem.ern.m.p	3	4	0	0
1112	2	1	99	0	1	1	47	0	1	0	5	1	0	1	0	1	0	0	1	1	0	3	99	0	9	9	9	9	9	#NULL!	#NULL!		Onbekend	99	99	99	99	296.89	0	2271.09	0	0	0	0	Bipolaire II disorder	3	4	0	0
1114	1	1	99	1	1	0	30	1	0	0	5	1	0	1	0	1	0	0	1	1	0	1	99	0	9	9	9	9	1	#NULL!	#NULL!		Basisonderwijs / lagere school	1	0	1	1	295.3	304.3	2271.09	0	0	0	0	schizophrenia, paranoidtype	2	6	0	0
1115	1	1	99	0	1	0	29	1	0	0	5	1	3	1	0	1	0	0	1	1	0	1	99	0	9	9	9	9	1	#NULL!	#NULL!		(M)ULO / MAVO / VMBO theorie	5	1	1	1	304.4	298.9	2271.09	0	0	0	0	schizophrenia, paranoidtype	2	6	0	0
1116	1	1	99	1	1	1	52	0	1	0	5	1	0	1	0	1	0	0	1	1	0	5	99	0	9	9	9	9	9	#NULL!	#NULL!		Onbekend	99	99	99	99	309.81	296.22	799.9	0	0	0	0	Posttraumatic stress- disorder	4	11	0	0
1117	2	1	99	1	1	1	47	0	1	0	5	1	0	1	0	1	0	0	1	1	0	3	99	0	9	9	9	9	9	#NULL!	#NULL!		Onbekend	99	99	99	99	295.1	0	2271.09	0	0	0	0	schizophrenia, gedesorganiseerd type	2	6	0	0
1118	2	1	99	0	1	1	44	0	1	0	5	1	0	1	0	1	0	0	1	1	0	2	99	0	9	9	9	9	9	#NULL!	#NULL!		Onbekend	99	99	99	99	296.34	304.3	301.83	0	0	0	0	Depressieve st. recidiv.ern.m.psych	3	3	0	0
1120	1	1	99	0	1	0	35	1	0	0	5	1	2	1	0	1	0	0	1	1	0	1	99	0	9	9	9	9	9	#NULL!	#NULL!		Onbekend	99	99	99	99	295.9	305.2	2271.09	0	0	0	0	Psychotic disorder NAO	2	5	0	0
1122	2	1	99	0	1	1	41	0	1	0	5	1	0	1	0	1	0	0	1	1	0	2	99	0	9	9	9	9	0	#NULL!	#NULL!		MBO (middelbaar beroepsonderwijs) 3-4 jarig	7	0	1	1	309.81	300	301.83	0	0	0	0	Posttraumatic stress- disorder	4	11	0	0
1124	2	1	99	0	1	1	46	0	1	0	5	1	2	1	0	1	0	0	1	1	0	5	99	0	9	9	9	9	0	#NULL!	#NULL!		HAVO	8	0	1	1	296.43	305.1	301.83	0	0	0	0	Bipol.I st. mst rct.epi.hypomaan	3	4	0	0
1125	2	1	99	0	1	1	40	0	1	0	5	1	0	1	0	1	0	0	1	1	0	3	99	0	9	9	9	9	0	#NULL!	#NULL!		MBO (middelbaar beroepsonderwijs) 3-4 jarig	7	0	1	1	2261.1	2261.1	301.83	0	0	0	0	ADHD	9	9	0	1
1126	1	1	99	0	1	0	32	1	0	0	5	1	0	1	0	1	0	0	1	1	0	1	99	0	9	9	9	9	1	#NULL!	#NULL!		Lager beroepsonderwijs, lager vormend onderwijs (LBO/VMBO praktijk)	4	0	1	1	295.3	298.9	2262.89	0	0	0	0	schizophrenia, paranoidtype	2	6	0	0
1128	2	1	99	0	1	1	59	0	1	0	5	1	0	1	0	1	0	0	1	1	0	3	99	0	9	9	9	9	1	#NULL!	#NULL!		Lager beroepsonderwijs, lager vormend onderwijs (LBO/VMBO praktijk)	4	0	1	1	296.33	309.81	301.9	0	0	0	0	Depress. st. recidiv. ern.z.psych	3	3	0	0
1129	2	1	99	0	1	1	56	0	1	0	5	1	0	1	0	1	0	0	1	1	0	2	99	0	9	9	9	9	9	#NULL!	#NULL!		Onbekend	99	99	1	1	295.1	0	2271.09	0	0	0	0	schizophrenia, gedesorganiseerd type	2	6	0	0
1130	2	1	99	0	1	0	34	1	0	0	5	1	0	1	0	1	0	0	1	1	0	2	99	0	9	9	9	9	1	#NULL!	#NULL!		(M)ULO / MAVO / VMBO theorie	5	1	1	1	296.3	296.32	301.83	0	0	0	0	Misbruik van cannabis	1	8	0	0
1131	1	1	99	0	1	1	46	0	1	0	5	1	0	1	0	1	0	0	1	1	0	3	99	0	9	9	9	9	1	#NULL!	#NULL!		Lager beroepsonderwijs, lager vormend onderwijs (LBO/VMBO praktijk)	4	0	1	1	296.33	0	301.9	0	0	0	0	Depress. st. recidiv. ern.z.psych	3	3	0	0
1132	2	1	99	1	1	0	33	1	0	0	5	1	0	1	0	1	0	0	1	1	0	2	99	0	9	9	9	9	9	#NULL!	#NULL!		Onbekend	99	99	99	99	296.32	309.81	301.9	0	0	0	0	Depressieve st. recidiv.ern.m.psych	3	3	0	0
1133	1	1	99	0	1	1	44	0	1	0	5	1	0	1	0	1	0	0	1	1	0	1	99	0	9	9	9	9	1	#NULL!	#NULL!		MBO (middelbaar beroepsonderwijs) 2 jarig	4	0	1	1	296.26	0	301.83	0	0	0	0	Depress. st. eenm.epi. ged.remissie	3	3	0	0
1135	1	1	99	0	1	1	49	0	1	0	5	1	0	1	0	1	0	0	1	1	0	1	99	0	9	9	9	9	9	#NULL!	#NULL!		Onbekend	99	99	99	99	295.3	303.9	301.9	0	0	0	0	schizophrenia, paranoidtype	2	6	0	0
1136	2	1	99	0	1	1	51	0	1	0	5	1	0	1	0	1	0	0	1	1	0	2	99	0	9	9	9	9	1	#NULL!	#NULL!		Lager beroepsonderwijs, lager vormend onderwijs (LBO/VMBO praktijk)	4	0	1	1	296.36	296.32	2262.89	0	0	0	0	Depress. st. recidiv.ged.remissie	3	3	0	0
1137	1	1	99	0	1	0	17	1	0	0	5	1	0	1	0	1	0	0	1	1	0	5	99	0	9	9	9	9	1	#NULL!	#NULL!		Lager beroepsonderwijs, lager vormend onderwijs (LBO/VMBO praktijk)	4	0	1	1	299.8	300.3	2271.09	0	0	0	0	Syndroom van Rett	9	9	1	0
1138	2	1	99	0	1	1	47	0	1	0	5	1	0	1	0	1	0	0	1	1	0	4	99	0	9	9	9	9	9	#NULL!	#NULL!		Onbekend	99	99	99	99	298.9	309.81	799.9	0	0	0	0	Psychotic disorder NAO	2	5	0	0
1139	2	1	99	0	1	1	37	0	1	0	5	1	0	1	0	1	0	0	1	1	0	3	99	0	9	9	9	9	9	#NULL!	#NULL!		Onbekend	99	99	99	99	296.22	314	799.9	0	0	0	0	Depressieve st. eenm.epi. matig	3	3	1	0
1140	1	1	99	1	1	1	41	0	1	0	5	1	0	1	0	1	0	0	1	1	0	1	99	0	9	9	9	9	1	0	#NULL!		Lager beroepsonderwijs, lager vormend onderwijs (LBO/VMBO praktijk)	4	0	99	99	295.6	299.8	2262.89	0	0	0	0	schizophrenia, resttype	2	6	1	0
1141	2	1	99	0	1	1	42	0	1	0	5	1	0	1	0	1	0	0	1	1	0	2	99	0	9	9	9	9	9	1	#NULL!		Onbekend	99	99	99	99	300	0	799.9	0	0	0	0	Psychotic disorder NAO	2	5	0	0
1142	2	1	99	1	1	0	33	1	0	0	5	1	0	1	0	1	0	0	1	1	0	1	99	0	9	9	9	9	9	#NULL!	#NULL!		Onbekend	99	99	1	1	295.3	309.81	317	2262.89	0	0	0	schizophrenia, paranoidtype	2	6	0	0
1143	1	1	99	0	1	1	53	0	1	0	5	1	0	1	0	1	0	0	1	1	0	2	99	0	9	9	9	9	1	#NULL!	#NULL!		(M)ULO / MAVO / VMBO theorie	5	1	1	1	296.23	300.02	301.9	0	0	0	0	Depress. st. recidiv.ged.remissie	3	3	0	0
1144	2	1	99	0	1	1	51	0	1	0	5	1	0	1	0	1	0	0	1	1	0	3	99	0	9	9	9	9	9	#NULL!	#NULL!		Onbekend	99	99	99	99	300.02	0	2271.09	0	0	0	0	Gegeneraliseerde angst disorder	4	2	0	0
1145	2	1	99	1	1	2	61	0	0	1	5	1	0	1	0	1	0	0	1	1	0	4	99	0	9	9	9	9	9	#NULL!	#NULL!		Onbekend	99	99	99	99	296.3	309.81	301.82	0	0	0	0	Stemmings disorder NAO	3	3	0	0
1146	1	1	99	0	1	1	52	0	1	0	5	1	0	1	0	1	0	0	1	1	0	2	99	0	9	9	9	9	0	#NULL!	#NULL!		MBO (middelbaar beroepsonderwijs) 3-4 jarig	7	0	1	1	0	296.26	0	301.9	0	0	0	Depress. st. eenm.epi. ern.z.psych.	3	3	0	1
1147	2	1	99	0	1	1	56	0	1	0	5	1	0	1	0	1	0	0	1	1	0	1	99	0	9	9	9	9	1	#NULL!	#NULL!		Lager beroepsonderwijs, lager vormend onderwijs (LBO/VMBO praktijk)	4	0	99	99	309.81	296.33	799.9	0	0	0	0	Posttraumatic stress- disorder	4	11	0	0
1148	2	1	99	0	1	1	49	0	1	0	5	1	0	1	0	1	0	0	1	1	0	1	99	0	9	9	9	9	9	#NULL!	#NULL!		Onbekend	99	99	99	99	298.9	0	799.9	0	0	0	0	Psychotic disorder NAO	2	5	0	0
1149	2	1	99	1	1	1	53	0	1	0	5	1	0	1	0	1	0	0	1	1	0	4	99	0	9	9	9	9	1	#NULL!	#NULL!		Basisonderwijs / lagere school	1	0	99	99	295.7	0	2271.09	0	0	0	0	Schizoaffectieve disorder	2	6	0	0
1150	2	1	99	0	1	1	43	0	1	0	5	1	0	1	0	1	0	0	1	1	0	2	99	0	9	9	9	9	9	#NULL!	#NULL!		Onbekend	99	99	99	99	300.9	300	799.9	0	0	0	0	Niet gespecif. psych. st.n.psychot.	0	0	0	0
1151	1	1	99	0	1	1	54	0	1	0	5	1	0	1	0	1	0	0	1	1	0	2	99	0	9	9	9	9	9	#NULL!	#NULL!		Onbekend	99	99	99	99	296.32	309.81			0	0	0	Depress. st. recidiv. ern.z.psych	3	3	0	0
1152	2	1	99	0	1	1	58	0	1	0	5	1	0	1	0	1	0	0	1	1	0	2	99	0	9	9	9	9	9	#NULL!	#NULL!		Onbekend	99	99	99	99	295.7	0	2271.09	0	0	0	0	Schizoaffectieve disorder	2	6	0	0
1153	2	1	99	0	1	1	42	0	1	0	5	1	0	1	0	1	0	0	1	1	0	2	99	0	9	9	9	9	9	#NULL!	#NULL!		Onbekend	99	99	99	99	296.89	298.9	301.9	0	0	0	0	Bipolaire II disorder	3	4	0	0
1154	1	1	99	0	1	0	26	1	0	0	5	1	0	1	0	1	0	0	1	1	0	1	99	0	9	9	9	9	1	#NULL!	#NULL!		Geen	0	0	99	99	312.9	292.9	301.7	0	0	0	0	Psychotic disorder NAO	2	5	1	0
1155	1	1	99	0	1	0	27	1	0	0	5	1	0	1	0	1	0	0	1	1	0	1	99	0	9	9	9	9	9	#NULL!	#NULL!		Onbekend	99	99	99	99	305	312.3	301.9	0	0	0	0	Misbruik van alcohol	1	8	0	0
1156	2	1	99	0	1	0	33	1	0	0	5	1	0	1	0	1	0	0	1	1	0	2	99	0	9	9	9	9	9	#NULL!	#NULL!		Onbekend	99	99	99	99	314.01	300.4	301.83	0	0	0	0	Schizofreniforme disorder	2	6	1	0
1157	1	1	99	0	1	0	31	1	0	0	5	1	0	1	0	1	0	0	1	1	0	1	99	0	9	9	9	9	9	#NULL!	#NULL!		Onbekend	99	99	99	99	295.3	0	2271.09	0	0	0	0	schizophrenia, paranoidtype	2	6	0	0
1158	2	1	99	0	1	0	29	1	0	0	5	1	0	1	0	1	0	0	1	1	0	1	99	0	9	9	9	9	9	#NULL!	#NULL!		Onbekend	99	99	99	99	295.9	300	301.6	301.83	0	0	0	Depressieve st. recidiv. n.gespe	3	3	0	0
1159	2	1	99	0	1	0	28	1	0	0	5	1	0	1	0	1	0	0	1	1	0	3	99	0	9	9	9	9	1	#NULL!	#NULL!		Lager beroepsonderwijs, lager vormend onderwijs (LBO/VMBO praktijk)	4	0	1	1	304.8	309.4	317	0	0	0	0	Posttraumatic stress- disorder	4	11	0	0
1160	1	1	99	0	1	1	44	0	1	0	5	1	0	1	0	1	0	0	1	1	0	1	99	0	9	9	9	9	9	#NULL!	#NULL!		Onbekend	99	99	99	99								Posttraumatic stress- disorder	4	11	0	1
1161	1	1	99	0	1	1	59	0	1	0	5	1	0	1	0	1	0	0	1	1	0	2	99	0	9	9	9	9	1	#NULL!	#NULL!		(M)ULO / MAVO / VMBO theorie	5	1	1	1	296.32	0	2271.09	0	0	0	0	Depressieve st. recidiv. matig	3	3	0	0
1162	1	1	99	0	1	0	23	1	0	0	5	1	0	1	0	1	0	0	1	1	0	1	99	0	9	9	9	9	9	#NULL!	#NULL!		Onbekend	99	99	99	99	2262.2	296.8	799.9	0	0	0	0	schizophrenia, paranoidtype	2	6	0	1
1163	2	1	99	0	1	1	40	0	1	0	5	1	0	1	0	1	0	0	1	1	0	1	99	0	9	9	9	9	1	#NULL!	#NULL!		Lager beroepsonderwijs, lager vormend onderwijs (LBO/VMBO praktijk)	4	0	1	1	298.9	0	799.9	319	0	0	0	Schizoaffectieve disorder	2	6	0	0
1164	2	1	99	0	1	0	29	1	0	0	5	1	0	1	0	1	0	0	1	1	0	1	99	0	9	9	9	9	0	#NULL!	#NULL!		MBO (middelbaar beroepsonderwijs) 3-4 jarig	7	0	1	1	309.81	296.32	799.9	0	0	0	0	Posttraumatic stress- disorder	4	11	0	0
1165	1	1	99	0	1	1	42	0	1	0	5	1	0	1	0	1	0	0	1	1	0	2	99	0	9	9	9	9	1	#NULL!	#NULL!		(M)ULO / MAVO / VMBO theorie	5	1	1	1	312.3	0	2271.09	0	0	0	0	disorder impulsbeheersing NAO	0	1	0	0
1166	1	1	99	0	1	1	56	0	1	0	5	1	0	1	0	1	0	0	1	1	0	5	99	0	9	9	9	9	1	#NULL!	#NULL!		(M)ULO / MAVO / VMBO theorie	5	1	1	1								Depress. st. eenm.epi. ern.z.psych.	3	3	0	1
1167	1	1	99	0	1	0	33	1	0	0	5	1	0	1	0	1	0	0	1	1	0	1	99	0	9	9	9	9	0	#NULL!	#NULL!		HAVO	8	0	1	1	305	296.32	2271.09	0	0	0	0	Misbruik van alcohol	1	8	0	0
1168	1	1	99	0	1	0	26	1	0	0	5	1	0	1	0	1	0	0	1	1	0	1	99	0	9	9	9	9	0	#NULL!	#NULL!		MBO (middelbaar beroepsonderwijs) 3-4 jarig	7	0	1	1	296.43	0	799.9	0	0	0	0	Bipol.I st. mst rct.epi.man.matig	3	4	0	0
1169	1	1	99	0	1	2	64	0	0	1	5	1	0	1	0	1	0	0	1	1	0	1	99	0	9	9	9	9	1	#NULL!	#NULL!		Lager beroepsonderwijs, lager vormend onderwijs (LBO/VMBO praktijk)	4	0	99	99	298.9	0	799.9	0	0	0	0	Psychotic disorder NAO	2	5	0	0
1170	2	1	28	0	1	0	35	1	0	0	5	1	0	1	0	1	0	0	1	1	0	2	0	1	1	0	0	0	0	#NULL!	#NULL!		Wetenschappelijk onderwijs (master)	11	0	1	1	300	296.34	799.9	0	0	0	0	Anxiety disorder NAO	4	2	0	0
1171	2	1	23	0	1	2	60	0	0	1	5	1	0	1	0	1	0	0	1	1	0	2	0	1	1	0	0	0	1	#NULL!	#NULL!		(M)ULO / MAVO / VMBO theorie	5	1	1	1	311	309.81	301.83	0	0	0	0	Depressieve disorder NAO	3	3	0	0
1172	1	1	27	0	1	2	65	0	0	1	5	1	0	1	0	1	0	0	1	1	0	2	0	1	1	0	0	0	0	#NULL!	#NULL!		Wetenschappelijk onderwijs (master)	11	0	1	1	296.34	299	301.9	0	0	0	0	Depress. st. eenm.epi. ern.m.psych.	3	3	1	0
1173	2	1	22	0	1	2	63	0	0	1	5	1	0	1	0	1	0	0	1	1	0	3	0	1	1	0	0	0	1	#NULL!	#NULL!		(M)ULO / MAVO / VMBO theorie	5	1	1	1	296.56	0	301.6	0	0	0	0	Depress. st. recidiv. ern.z.psych	3	3	0	0
1174	2	1	18	0	1	1	45	0	1	0	5	1	0	1	0	1	0	0	1	1	0	1	1	1	0	1	0	0	1	#NULL!	#NULL!		0	0	0	1	1	296.52	0	301.9	0	0	0	0	Bipol.I st. mst rct.epi.gem.ern.m.p	3	4	0	0
1175	2	1	18	0	1	1	50	0	1	0	5	1	0	1	0	1	0	0	1	1	0	2	1	1	0	1	0	0	9	#NULL!	#NULL!		Onbekend	99	99	1	1	295.7	303.9	799.9	0	0	0	0	Schizoaffectieve disorder	2	6	0	0
1176	2	1	22	0	1	0	32	1	0	0	5	1	0	1	0	1	0	0	1	1	0	99	0	1	1	0	0	0	0	#NULL!	#NULL!		HBO (hoger beroepsonderwijs)	10	0	1	1	296.36	299.8	301.4	301.82	0	0	0	Depressieve st. recidiv.ern.m.psych	3	3	1	0
1177	2	1	19	1	1	0	35	1	0	0	5	1	0	1	0	1	0	0	1	1	0	3	1	1	0	1	0	0	9	#NULL!	#NULL!		Onbekend	99	99	1	1	296.9	0	2262.89	0	0	0	0	Depressieve st. recidiv.ern.m.psych	3	3	0	0
1178	1	1	15	0	1	1	45	0	1	0	5	1	2	1	0	1	0	0	1	1	0	1	1	1	0	0	1	1	1	0	#NULL!		(M)ULO / MAVO / VMBO theorie	5	1	1	1	295.7	0	301.6	0	0	0	0	Schizoaffectieve disorder	2	6	0	0
1179	2	1	21	0	1	1	50	0	1	0	5	1	0	1	0	1	0	0	1	1	0	2	0	1	1	0	0	0	1	#NULL!	#NULL!		MBO (middelbaar beroepsonderwijs) 2 jarig	4	0	1	1	296.32	300.81	799.9	0	0	0	0	Depressieve st. recidiv. matig	3	3	0	0
1180	2	1	21	0	1	1	52	0	1	0	5	1	0	1	0	1	0	0	1	1	0	2	0	1	1	0	0	0	0	#NULL!	#NULL!		MBO (middelbaar beroepsonderwijs) 3-4 jarig	7	0	1	1	298.9	0	301.9	2262.89	0	0	0	Waan disorder	2	6	0	0
1181	2	1	24	0	1	0	21	1	0	0	5	1	0	1	0	1	0	0	1	1	0	1	0	1	1	0	0	0	0	1	#NULL!		HAVO	8	0	1	1	300	296.3	301.6	0	0	0	0	Anxiety disorder NAO	4	2	0	0
1182	1	1	20	1	1	0	35	1	0	0	5	1	0	1	0	1	0	0	1	1	0	1	0	1	1	0	0	0	9	#NULL!	#NULL!		Onbekend	99	99	1	1	309.81	300.81	799.9	0	0	0	0	Psychotic disorder NAO	2	5	0	0
1183	2	1	22	0	1	1	52	0	1	0	5	1	0	1	0	1	0	0	1	1	0	99	0	1	1	0	0	0	9	#NULL!	#NULL!		Onbekend	99	99	1	1	303.9	298.9	799.9	0	0	0	0	Alcoholafhankelijkheid	1	5	0	0
1184	2	1	99	0	1	1	41	0	1	0	5	1	0	1	0	1	0	0	1	1	0	2	99	0	9	9	9	9	0	#NULL!	#NULL!		MBO (middelbaar beroepsonderwijs) 3-4 jarig	7	0	1	1	298.8	296.89	2262.89	301.9	0	0	0	Bipolaire II disorder	3	4	0	0
1185	2	1	17	0	1	1	36	0	1	0	5	1	0	1	0	1	0	0	1	1	0	1	1	1	0	1	0	0	1	#NULL!	#NULL!		Lager beroepsonderwijs, lager vormend onderwijs (LBO/VMBO praktijk)	4	0	1	1	300.4	0	799.9	0	0	0	0	disorder impulsbeheersing NAO	0	1	0	0
1186	2	1	99	0	1	0	31	1	0	0	5	1	0	1	0	1	0	0	1	1	0	1	99	0	9	9	9	9	1	#NULL!	#NULL!		MBO (middelbaar beroepsonderwijs) 2 jarig	4	0	1	1	312.9	296.32	799.9	0	0	0	0	Dysthyme disorder	3	3	1	0
1187	2	1	99	0	1	0	30	1	0	0	5	1	0	1	0	1	0	0	1	1	0	1	99	0	9	9	9	9	0	#NULL!	#NULL!		MBO (middelbaar beroepsonderwijs) 3-4 jarig	7	0	99	99								Somatoforme disorder NAO	4	2	0	1
1188	1	1	99	0	1	2	60	0	0	1	5	1	0	1	0	1	0	0	1	1	0	1	99	0	9	9	9	9	9	#NULL!	#NULL!		Onbekend	99	99	1	1	295.9	2261.8	301.5	0	0	0	0	Schizoaffectieve disorder	2	6	0	0
1189	1	1	99	0	1	2	62	0	0	1	5	1	0	1	0	1	0	0	1	1	0	1	99	0	9	9	9	9	9	#NULL!	#NULL!		Onbekend	99	99	99	99	312.3	303.9	301.9	0	0	0	0	disorder in de impulsbeheersing NAO	0	1	0	0
1190	1	1	99	0	1	1	37	0	1	0	5	1	0	1	0	1	0	0	1	1	0	1	99	0	9	9	9	9	1	0	#NULL!		Lager beroepsonderwijs, lager vormend onderwijs (LBO/VMBO praktijk)	4	0	99	99	303.9	304.3	799.9	0	0	0	0	Dysthyme disorder	3	3	0	0
1191	2	1	21	0	1	0	26	1	0	0	5	1	0	1	0	1	0	0	1	1	0	1	0	1	1	0	0	0	1	#NULL!	#NULL!		MBO (middelbaar beroepsonderwijs) 2 jarig	4	0	1	1	299	307.5	2271.09	0	0	0	0	Syndroom van Rett	9	9	1	0
1192	2	1	19	0	1	1	40	0	1	0	5	1	0	1	0	1	0	0	1	1	0	2	1	1	0	1	0	0	1	0	#NULL!		Lager beroepsonderwijs, lager vormend onderwijs (LBO/VMBO praktijk)	4	0	1	1	296.32	2262.81	301.9	0	0	0	0	Posttraumatic stress- disorder	4	11	0	0
1193	2	1	27	0	1	1	43	0	1	0	5	1	0	1	0	1	0	0	1	1	0	2	0	1	1	0	0	0	1	#NULL!	#NULL!		(M)ULO / MAVO / VMBO theorie	5	1	1	1	2261.1	0	301.83	0	0	0	0	Partner-relatieprobleem	0	1	0	1
1194	2	1	21	1	1	1	40	0	1	0	5	1	0	1	0	1	0	0	1	1	0	1	0	1	1	0	0	0	0	#NULL!	#NULL!		Wetenschappelijk onderwijs (master)	11	0	1	1	296.23	0	301.6	0	0	0	0	Depress. st. eenm.epi. ern.z.psych.	3	3	0	0
1195	1	1	23	0	1	2	65	0	0	1	5	1	0	1	0	1	0	0	1	1	0	2	0	1	1	0	0	0	0	#NULL!	#NULL!		Wetenschappelijk onderwijs (master)	11	0	1	1	296.53	0	2271.09	0	0	0	0	Bipol.I st. mst rct.epi.man.matig	3	4	0	0
1196	2	1	22	0	1	0	26	1	0	0	5	1	0	1	0	1	0	0	1	1	0	1	0	1	1	0	0	0	0	#NULL!	#NULL!		HBO (hoger beroepsonderwijs)	10	0	1	1	299.8	300	301.83	301.83	0	0	0	Anxiety disorder NAO	4	2	1	0
1197	1	1	7	0	1	1	56	0	1	0	5	1	0	1	0	1	0	0	1	1	0	3	1	1	0	0	1	1	9	#NULL!	#NULL!		Onbekend	99	99	1	1	294.1	294.8			0	0	0	Psychotic disorder NAO	2	5	0	0
1198	1	1	99	0	1	0	27	1	0	0	5	1	0	1	0	1	0	0	1	1	0	1	99	0	9	9	9	9	9	#NULL!	#NULL!		Onbekend	99	99	99	99	295.4	295.3	2271.09	0	0	0	0	Schizofreniforme disorder	2	6	0	0
1199	2	1	21	0	1	1	56	0	1	0	5	1	0	1	0	1	0	0	1	1	0	2	0	1	1	0	0	0	0	#NULL!	#NULL!		MBO (middelbaar beroepsonderwijs) 3-4 jarig	7	0	1	1	300.82	292.9	799.9	0	0	0	0	Depress. st. recidiv. ern.z.psych	3	3	0	0
1200	1	1	20	0	1	1	54	0	1	0	5	1	0	1	0	1	0	0	1	1	0	1	0	1	1	0	0	0	1	#NULL!	#NULL!		(M)ULO / MAVO / VMBO theorie	5	1	1	1	296.56	0	2271.09	0	0	0	0	Psychotic disorder NAO	2	5	0	0
1201	2	1	12	0	1	1	53	0	1	0	5	1	0	1	0	1	0	0	1	1	0	3	1	1	0	0	1	1	1	#NULL!	#NULL!		Basisonderwijs / lagere school	1	0	1	1	295.7	312.3	2262.89	0	0	0	0	Schizoaffectieve disorder	2	6	0	0
1202	2	1	22	0	1	0	17	1	0	0	5	1	0	1	0	1	0	0	1	1	0	1	0	1	1	0	0	0	1	#NULL!	#NULL!		(M)ULO / MAVO / VMBO theorie	5	1	1	1	299	307.5	2271.09	0	0	0	0	Autistische disorder	9	9	1	0
1203	1	1	99	0	1	0	27	1	0	0	5	1	0	1	0	1	0	0	1	1	0	99	99	0	9	9	9	9	1	#NULL!	#NULL!		(M)ULO / MAVO / VMBO theorie	5	1	99	99	298.8	0	301.9	0	0	0	0	Psychotic disorder NAO	2	5	0	0
1204	2	1	99	0	1	1	52	0	1	0	5	1	0	1	0	1	0	0	1	1	0	99	99	0	9	9	9	9	9	#NULL!	#NULL!		Onbekend	99	99	99	99	296.32	300	799.9	0	0	0	0	Depressieve st. recidiv. matig	3	3	0	0
1205	2	1	28	0	1	1	55	0	1	0	5	1	0	1	0	1	0	0	1	1	0	1	0	1	1	0	0	0	0	#NULL!	#NULL!		HAVO	8	0	1	1	296.32	0	301.6	0	0	0	0	Depressieve st. recidiv. matig	3	3	0	0
1206	2	1	20	0	1	1	41	0	1	0	5	1	0	1	0	1	0	0	1	1	0	99	0	1	1	0	0	0	1	#NULL!	#NULL!		(M)ULO / MAVO / VMBO theorie	5	1	1	1	300.14	309.81	2271.09	0	0	0	0	Dissociatieve identiteits disorder	0	1	0	0
1207	2	1	25	1	1	1	55	0	1	0	5	1	0	1	0	1	0	0	1	1	0	2	0	1	1	0	0	0	1	#NULL!	#NULL!		MBO (middelbaar beroepsonderwijs) 2 jarig	4	0	1	1	296.32	0	301.9	0	0	0	0	Depress. st. recidiv.ged.remissie	3	3	0	0
1208	2	1	22	0	1	1	42	0	1	0	5	1	0	1	0	1	0	0	1	1	0	2	0	1	1	0	0	0	0	#NULL!	#NULL!		HBO (hoger beroepsonderwijs)	10	0	1	1	300.01	309	301.82	0	0	0	0	Depress. st. eenm.epi. ern.z.psych.	3	3	0	0
1209	2	1	22	0	1	1	59	0	1	0	5	1	0	1	0	1	0	0	1	1	0	2	0	1	1	0	0	0	1	#NULL!	#NULL!		Lager beroepsonderwijs, lager vormend onderwijs (LBO/VMBO praktijk)	4	0	1	1	296.34	0	301.6	0	0	0	0	Depress. st. recidiv. ern.z.psych	3	3	0	0
1210	1	1	18	0	1	1	56	0	1	0	5	1	0	1	0	1	0	0	1	1	0	3	1	1	0	1	0	0	9	#NULL!	#NULL!		Onbekend	99	99	1	1	312.3	314.01	799.9	0	0	0	0	Depressieve disorder NAO	3	3	1	0
1211	2	1	99	0	1	2	65	0	0	1	5	1	0	1	0	1	0	0	1	1	0	2	99	0	9	9	9	9	9	#NULL!	#NULL!		Onbekend	99	99	99	99	296.33	300.01	799.9	0	0	0	0	Depress. st. recidiv. ern.z.psych	3	3	0	0
1213	2	1	21	0	1	1	56	0	1	0	5	1	0	1	0	1	0	0	1	1	0	2	0	1	1	0	0	0	1	#NULL!	#NULL!		(M)ULO / MAVO / VMBO theorie	5	1	1	1	296.3	300	301.6	0	0	0	0	Anxiety disorder NAO	4	2	0	0
1214	1	1	99	0	1	2	64	0	0	1	5	1	0	1	0	1	0	0	1	1	0	99	99	0	9	9	9	9	9	#NULL!	#NULL!		Onbekend	99	99	0	99								Depress. st. recidiv. ern.z.psych	3	3	0	1
1215	2	1	17	0	1	1	54	0	1	0	5	1	0	1	0	1	0	0	1	1	0	3	1	1	0	1	0	0	1	#NULL!	#NULL!		MBO (middelbaar beroepsonderwijs) 2 jarig	4	0	1	1	296.43	2262.2	2271.09	0	0	0	0	Bipol.I st. mst rct.epi.hypomaan	3	4	0	0
1216	2	1	17	0	1	1	49	0	1	0	5	1	0	1	0	1	0	0	1	1	0	2	1	1	0	1	0	0	1	#NULL!	#NULL!		Lager beroepsonderwijs, lager vormend onderwijs (LBO/VMBO praktijk)	4	0	1	1	296.3	0	2262.89	0	0	0	0	Depress. st. recidiv.ged.remissie	3	3	0	0
1217	1	1	27	0	1	1	55	0	1	0	5	1	0	1	0	1	0	0	1	1	0	2	0	1	1	0	0	0	0	#NULL!	#NULL!		HBO (hoger beroepsonderwijs)	10	0	1	1	296.24	299.8	799.9	0	0	0	0	Depress. st. eenm.epi. ern.m.psych.	3	3	1	0
1218	2	1	22	0	1	1	43	0	1	0	5	1	0	1	0	1	0	0	1	1	0	2	0	1	1	0	0	0	1	#NULL!	#NULL!		MBO (middelbaar beroepsonderwijs) 2 jarig	4	0	1	1	296.32	309.81	799.9	0	0	0	0	Depress. st. eenm.epi. ern.z.psych.	3	3	0	0
1219	2	1	23	0	1	0	24	1	0	0	5	1	0	1	0	1	0	0	1	1	0	1	0	1	1	0	0	0	1	#NULL!	#NULL!		(M)ULO / MAVO / VMBO theorie	5	1	1	1	298.9	292.12	799.9	0	0	0	0	Zwakbegaafd	7	0	0	0
1220	2	1	17	0	1	1	58	0	1	0	5	1	0	1	0	1	0	0	1	1	0	3	1	1	0	1	0	0	1	#NULL!	#NULL!		Lager beroepsonderwijs, lager vormend onderwijs (LBO/VMBO praktijk)	4	0	99	99	295.7	2262.2	301.6	0	0	0	0	Schizoaffectieve disorder	2	6	0	0
1221	2	1	14	0	1	1	37	0	1	0	5	1	0	1	0	1	0	0	1	1	0	1	1	1	0	0	1	1	1	#NULL!	#NULL!		(M)ULO / MAVO / VMBO theorie	5	1	1	1	309.81	0	301.82	0	0	0	0	Posttraumatic stress- disorder	4	11	0	0
1222	2	1	25	0	1	0	30	1	0	0	5	1	0	1	0	1	0	0	1	1	0	2	0	1	1	0	0	0	0	#NULL!	#NULL!		MBO (middelbaar beroepsonderwijs) 3-4 jarig	7	0	1	1	296.22	0	2271.09	0	0	0	0	Depressieve st. eenm.epi. matig	3	3	0	0
1223	2	1	11	0	1	1	54	0	1	0	5	1	0	1	0	1	0	0	1	1	0	3	1	1	0	0	1	1	1	1	#NULL!		(M)ULO / MAVO / VMBO theorie	5	1	1	1	295.7	303.9	301.7	0	0	0	0	Schizoaffectieve disorder	2	6	0	0
1224	1	1	13	0	1	0	26	1	0	0	5	1	0	1	0	1	0	0	1	1	0	99	1	1	0	0	1	1	1	#NULL!	#NULL!		MBO (middelbaar beroepsonderwijs) 2 jarig	4	0	1	1	298.9	0	317	0	0	0	0	Psychotic disorder NAO	2	5	0	0
1225	2	1	16	0	1	1	52	0	1	0	5	1	0	1	0	1	0	0	1	1	0	2	1	1	0	1	0	0	9	#NULL!	#NULL!		Onbekend	99	99	1	1	295.7	2262.81	2271.09	0	0	0	0	Schizoaffectieve disorder	2	6	0	0
1226	1	1	20	0	1	1	52	0	1	0	5	1	0	1	0	1	0	0	1	1	0	3	0	1	1	0	0	0	9	#NULL!	#NULL!		Onbekend	99	99	1	1	296.32	0	301.9	0	0	0	0	Acute stress- disorder	4	2	0	0
1227	2	1	18	0	1	2	61	0	0	1	5	1	0	1	0	1	0	0	1	1	0	2	1	1	0	1	0	0	1	#NULL!	#NULL!		(M)ULO / MAVO / VMBO theorie	5	1	1	1	296.34	0	301.6	0	0	0	0	Depressieve st. recidiv. matig	3	3	0	0
1228	1	1	18	0	1	1	45	0	1	0	5	1	0	1	0	1	0	0	1	1	0	2	1	1	0	1	0	0	9	#NULL!	#NULL!		Onbekend	99	99	1	1								Niet gespecif. psych. st.n.psychot.	0	0	0	1
1229	1	1	10	0	1	1	58	0	1	0	5	1	0	1	0	1	0	0	1	1	0	1	1	1	0	0	1	1	1	#NULL!	#NULL!		Geen	0	0	1	1	295.7	305	301.9	0	0	0	0	Schizoaffectieve disorder	2	6	0	0
1230	1	1	99	1	1	1	57	0	1	0	5	1	2	1	0	1	0	0	1	0	2	3	99	0	9	9	9	9	9	1	#NULL!		Onbekend	99	99	99	99	300.9	314.01	301.9	0	0	0	0	Psychotic disorder NAO	2	5	1	0
1231	2	1	18	0	1	0	29	1	0	0	5	1	0	1	0	1	0	0	1	1	0	1	1	1	0	1	0	0	1	#NULL!	#NULL!		Lager beroepsonderwijs, lager vormend onderwijs (LBO/VMBO praktijk)	4	0	1	1	300	300.02	301.82	0	0	0	0	Anxiety disorder NAO	4	2	0	0
1232	1	1	25	0	1	0	31	1	0	0	5	1	0	1	0	1	0	0	1	1	0	99	0	1	1	0	0	0	9	#NULL!	#NULL!		Onbekend	99	99	1	1	299.8	304.8	799.9	0	0	0	0	Syndroom van Rett	9	9	1	0
1233	2	1	18	0	1	1	55	0	1	0	5	1	0	1	0	1	0	0	1	1	0	2	1	1	0	1	0	0	1	#NULL!	#NULL!		Geen	0	0	1	1	309.81	307.5	301.83	0	0	0	0	Dissociatieve disorder NAO	0	1	0	0
1234	1	1	22	0	1	1	59	0	1	0	5	1	0	1	0	1	0	0	1	1	0	2	0	1	1	0	0	0	1	#NULL!	#NULL!		Lager beroepsonderwijs, lager vormend onderwijs (LBO/VMBO praktijk)	4	0	1	1	300	0	2271.09	0	0	0	0	Depress. st. eenm.epi. ern.m.psych.	3	3	0	0
1235	1	1	26	0	1	1	37	0	1	0	5	1	0	1	0	1	0	0	1	1	0	0	0	1	1	0	0	0	1	#NULL!	#NULL!		(M)ULO / MAVO / VMBO theorie	5	1	1	1	300.01	312.3	301.82		0	0	0	Paniek disorder zonder agorafobie	4	2	0	0
1236	2	1	22	0	1	2	64	0	0	1	5	1	0	1	0	1	0	0	1	1	0	3	0	1	1	0	0	0	0	#NULL!	#NULL!		HBO (hoger beroepsonderwijs)	10	0	1	1	295.4	0	301.22	0	0	0	0	Schizoaffectieve disorder	2	6	0	0
1237	2	1	23	0	1	1	49	0	1	0	5	1	0	1	0	1	0	0	1	1	0	2	0	1	1	0	0	0	1	#NULL!	#NULL!		(M)ULO / MAVO / VMBO theorie	5	1	1	1	296.33	2262.89	301.82	0	0	0	0	Depressieve st. recidiv. n.gespe	3	3	0	0
1238	1	1	19	0	1	1	46	0	1	0	5	1	0	1	0	1	0	0	1	1	0	2	1	1	0	1	0	0	9	#NULL!	#NULL!		Onbekend	99	99	1	1	300	311	2271.09	0	0	0	0	Anxiety disorder NAO	4	2	0	0
1239	1	1	99	1	1	0	25	1	0	0	5	1	0	1	0	1	0	0	1	1	0	3	99	0	9	9	9	9	1	#NULL!	#NULL!		Lager beroepsonderwijs, lager vormend onderwijs (LBO/VMBO praktijk)	4	0	0	0	295.9	295.3	318	0	0	0	0	Psychotic disorder NAO	2	5	0	0
1240	1	1	99	1	1	0	26	1	0	0	5	1	0	1	0	1	0	0	1	1	0	1	99	0	9	9	9	9	1	#NULL!	#NULL!		Geen	0	0	0	0	295.2	309.81	2262.89	0	0	0	0	schizophrenia, katatone type	2	6	0	0
1241	1	1	24	0	1	1	52	0	1	0	5	1	0	1	0	1	0	0	1	1	0	1	0	1	1	0	0	0	0	#NULL!	#NULL!		Wetenschappelijk onderwijs (master)	11	0	1	1	300.02	300.4	301.9	0	0	0	0	ADHD	9	9	0	0
1242	1	1	21	0	1	1	42	0	1	0	5	1	0	1	0	1	0	0	1	1	0	2	0	1	1	0	0	0	1	#NULL!	#NULL!		(M)ULO / MAVO / VMBO theorie	5	1	1	1	312.34	309.81	799.9	0	0	0	0	disorder in de impulsbeheersing NAO	0	1	0	0
1243	1	1	28	0	1	1	53	0	1	0	5	1	0	1	0	1	0	0	1	1	0	2	0	1	1	0	0	0	0	1	#NULL!		HBO (hoger beroepsonderwijs)	10	0	1	1	296.89	296.89	799.9	0	0	0	0	Depressieve disorder NAO	3	3	0	0
1244	1	1	15	0	1	1	57	0	1	0	5	1	0	1	0	1	0	0	1	1	0	2	1	1	0	0	1	1	9	#NULL!	#NULL!		Onbekend	99	99	1	1	296.53	0	2262.89	2262.89	0	0	0	Bipol.I st. mst rct.epi.dep.ern.z.p	3	4	0	0
1245	2	1	99	0	1	1	41	0	1	0	5	1	0	1	0	1	0	0	1	1	0	1	99	0	9	9	9	9	9	#NULL!	#NULL!		Onbekend	99	99	1	1	296.44	304.3	301.9	301.7	0	0	0	Acute stress- disorder	4	2	0	0
1246	1	1	19	0	1	2	67	0	0	1	5	1	0	1	0	1	0	0	1	1	0	2	1	1	0	1	0	0	9	#NULL!	#NULL!		Onbekend	99	99	1	1	296.44	0	799.9	0	0	0	0	Bipol.I st. mst rct.epi.man.ern.m.p	3	4	0	0
1247	2	1	17	0	1	0	32	1	0	0	5	1	0	1	0	1	0	0	1	1	0	2	1	1	0	1	0	0	1	#NULL!	#NULL!		Geen	0	0	1	1	300.01	0	2271.09	0	0	0	0	Paniek disorder zonder agorafobie	4	2	0	0
1248	1	1	18	0	1	0	24	1	0	0	5	1	0	1	0	1	0	0	1	1	0	1	1	1	0	1	0	0	1	#NULL!	#NULL!		Basisonderwijs / lagere school	1	0	1	1	300	309.81	799.9	0	0	0	0	Depress. st. eenm.epi. ern.z.psych.	3	3	0	0
1249	2	1	25	0	1	1	44	0	1	0	5	1	0	1	0	1	0	0	1	1	0	1	0	1	1	0	0	0	0	#NULL!	#NULL!		MBO (middelbaar beroepsonderwijs) 3-4 jarig	7	0	1	1	299	297.1	2271.09	0	0	0	0	Psychotic disorder NAO	2	5	1	0
1250	2	1	22	0	1	0	16	1	0	0	5	1	0	1	0	1	0	0	1	1	0	1	0	1	1	0	0	0	1	#NULL!	#NULL!		Basisonderwijs / lagere school	1	0	1	1	296.9	307.5	799.9	0	0	0	0	Stemmings disorder NAO	3	3	0	0
1251	1	1	25	0	1	1	53	0	1	0	5	1	0	1	0	1	0	0	1	1	0	2	0	1	1	0	0	0	0	#NULL!	#NULL!		HBO (hoger beroepsonderwijs)	10	0	1	1	296.43	300.02	799.9	0	0	0	0	Psychotic disorder NAO	2	5	0	0
1252	2	1	17	0	1	1	41	0	1	0	5	1	0	1	0	1	0	0	1	1	0	3	1	1	0	1	0	0	9	#NULL!	#NULL!		Onbekend	99	99	1	1	296.34	0	301.4	0	0	0	0	Kortdurende psychotische disorder	2	5	0	0
1253	1	1	4	1	1	0	16	1	0	0	5	1	0	1	0	1	0	0	1	1	0	1	1	1	0	0	1	1	1	#NULL!	#NULL!		Onbekend	99	99	1	1	296.8	0	799.9	0	0	0	0	Psychotic disorder NAO	2	5	0	0
1254	2	1	13	0	1	1	58	0	1	0	5	1	0	1	0	1	0	0	1	1	0	2	1	1	0	0	1	1	9	#NULL!	#NULL!		Onbekend	99	99	1	1	296.3	309.81	301.83	0	0	0	0	Depressieve st. recidiv. n.gespe	3	3	0	0
1255	2	1	17	0	1	1	53	0	1	0	5	1	2	1	0	1	0	0	1	1	0	3	1	1	0	1	0	0	1	#NULL!	#NULL!		Basisonderwijs / lagere school	1	0	1	1	296.4	296.8	301.9	0	0	0	0	Bipol.I st. mst rct.epi.gem.ern.m.p	3	4	0	0
1256	2	1	10	1	1	1	53	0	1	0	5	1	0	1	0	1	0	0	1	1	0	2	1	1	0	0	1	1	1	#NULL!	#NULL!		Geen	0	0	1	1	296.36	0	799.9	0	0	0	0	Depress. st. recidiv.ged.remissie	3	3	0	0
1257	2	1	17	0	1	2	61	0	0	1	5	1	0	1	0	1	0	0	1	1	0	3	1	1	0	1	0	0	9	#NULL!	#NULL!		Onbekend	99	99	1	1	295.3	0	2271.09	0	0	0	0	schizophrenia, paranoidtype	2	6	0	0
1258	2	1	25	0	1	1	52	0	1	0	5	1	0	1	0	1	0	0	1	1	0	4	0	1	1	0	0	0	1	#NULL!	#NULL!		MBO (middelbaar beroepsonderwijs) 2 jarig	4	0	1	1	296.34	2262.82	799.9	0	0	0	0	Depressieve st. recidiv.ern.m.psych	3	3	0	0
1259	1	1	22	0	1	1	55	0	1	0	5	1	0	1	0	1	0	0	1	1	0	2	0	1	1	0	0	0	1	1	#NULL!		(M)ULO / MAVO / VMBO theorie	5	1	1	1	300.4	299.8	301.82	0	0	0	0	Depress. st. recidiv.ged.remissie	3	3	1	0
1260	2	1	10	0	1	1	53	0	1	0	5	1	0	1	0	1	0	0	1	1	0	1	1	1	0	0	1	1	1	#NULL!	#NULL!		Lager beroepsonderwijs, lager vormend onderwijs (LBO/VMBO praktijk)	4	0	1	1	296.32	299.8	301.9	2262.89	0	0	0	Niet gespecif. psych. st.n.psychot.	0	0	1	0
1261	2	1	17	0	1	0	21	1	0	0	5	1	0	1	0	1	0	0	1	1	0	1	1	1	0	1	0	0	1	#NULL!	#NULL!		Geen	0	0	1	1	300.9	0	301.83	0	0	0	0	Niet gespecif. psych. st.n.psychot.	0	0	0	0
1262	2	1	12	0	1	1	41	0	1	0	5	1	0	1	0	1	0	0	1	1	0	1	1	1	0	0	1	1	1	#NULL!	#NULL!		Lager beroepsonderwijs, lager vormend onderwijs (LBO/VMBO praktijk)	4	0	1	1	295.7	0	2271.09	0	0	0	0	Schizoaffectieve disorder	2	6	0	0
1263	2	1	21	0	1	1	52	0	1	0	5	1	0	1	0	1	0	0	1	1	0	2	0	1	1	0	0	0	9	#NULL!	#NULL!		Onbekend	99	99	1	1	309.4	309.81	301.9	0	0	0	0	Onthouding van amfetamine	2	5	0	0
1264	2	1	99	0	1	1	56	0	1	0	5	1	0	1	0	1	0	0	1	1	0	3	99	0	9	9	9	9	1	0	#NULL!		Basisonderwijs / lagere school	1	0	99	99	296.3	300.23	301.83	0	0	0	0	Depressieve st. recidiv. n.gespe	3	3	0	0
1265	1	1	99	0	1	1	58	0	1	0	5	1	0	1	0	1	0	0	1	1	0	1	99	0	9	9	9	9	9	#NULL!	#NULL!		Onbekend	99	99	99	99	296.4	0	2271.09	0	0	0	0	Bipol.I st. mst rct.epi.hypomaan	3	4	0	0
1266	2	1	99	0	1	1	50	0	1	0	5	1	0	1	0	1	0	0	1	1	0	3	99	0	9	9	9	9	9	#NULL!	#NULL!		Onbekend	99	99	1	1	297.1	0	2271.09	0	0	0	0	Waan disorder	2	6	0	0
1267	2	1	99	0	1	1	50	0	1	0	5	1	0	1	0	1	0	0	1	1	0	5	99	0	9	9	9	9	0	#NULL!	#NULL!		HAVO	8	0	1	1	298.9	0	301.6	0	0	0	0	Psychotic disorder NAO	2	5	0	0
1268	1	1	99	0	1	1	44	0	1	0	5	1	0	1	0	1	0	0	1	1	0	1	99	0	9	9	9	9	9	#NULL!	#NULL!		Onbekend	99	99	1	1	780.09	0	799.9	0	0	0	0	Delirium	10	7	0	0
1269	1	1	99	0	1	2	63	0	0	1	5	1	0	1	0	1	0	0	1	1	0	2	99	0	9	9	9	9	1	#NULL!	#NULL!		Lager beroepsonderwijs, lager vormend onderwijs (LBO/VMBO praktijk)	4	0	1	1	296.24	0	2271.09	0	0	0	0	Depress. st. eenm.epi. ern.m.psych.	3	3	0	0
1270	2	1	99	1	1	1	48	0	1	0	5	1	0	1	0	1	0	0	1	1	0	2	99	0	9	9	9	9	0	#NULL!	#NULL!		HBO (hoger beroepsonderwijs)	10	0	1	1	295.7	2262.81	2271.09	0	0	0	0	Schizoaffectieve disorder	2	6	0	0
1271	1	1	99	0	1	1	42	0	1	0	5	1	0	1	0	1	0	0	1	1	0	2	99	0	9	9	9	9	1	#NULL!	#NULL!		Lager beroepsonderwijs, lager vormend onderwijs (LBO/VMBO praktijk)	4	0	99	99	299	311	317	0	0	0	0	Depressieve disorder NAO	3	3	1	0
1272	1	1	99	0	1	2	66	0	0	1	5	1	0	1	0	1	0	0	1	1	0	3	99	0	9	9	9	9	9	#NULL!	#NULL!		Onbekend	99	99	99	99								Depress. st. recidiv. ern.z.psych	3	3	0	1
1273	2	1	99	0	1	1	55	0	1	0	5	1	0	1	0	1	0	0	1	1	0	2	99	0	9	9	9	9	0	#NULL!	#NULL!		MBO (middelbaar beroepsonderwijs) 3-4 jarig	7	0	1	1	309.81	298.9	301.82	301.9	0	0	0	Anxiety disorder NAO	4	2	0	0
1274	1	1	99	0	1	0	35	1	0	0	5	1	0	1	0	1	0	0	1	1	0	3	99	0	9	9	9	9	0	#NULL!	#NULL!		Wetenschappelijk onderwijs (master)	11	0	1	1	297.1	0	799.9	0	0	0	0	Waan disorder	2	6	0	0
1275	2	1	99	0	1	2	81	0	0	1	5	1	0	1	0	1	0	0	1	1	0	2	99	0	9	9	9	9	9	#NULL!	#NULL!		Onbekend	99	99	1	1	296.34				0	0	0	Psychotic disorder NAO	2	5	0	0
1276	1	1	28	0	0	0	34	1	0	0	6	1	0	0	1	0	0	0	0	1	0	1	0	1	1	0	0	0	0	0	0	5	MBO4/HAVO	8	0	0	0	300.01	300.22	301.9		0	0	0	Paniek disorder	4	2	0	0
1277	1	1	28	0	0	1	36	0	1	0	6	1	0	0	1	0	0	0	0	1	0	1	0	1	1	0	0	0	0	0	0	7	Universiteit	11	0	0	0			301.9		0	0	0	Ongespecificeerde Persoonlijkheids disorder	6	0	0	1
1278	2	1	16	0	0	1	36	0	1	0	6	1	0	0	1	0	0	0	0	1	0	3	1	1	0	1	0	0	1	0	0	4	MAVO	5	1	0	0	311	291.9	301.83	0	0	0	0	Andere gespecificeerde depressieve stemmings disorder	3	3	0	0
1279	2	1	12	1	0	0	32	1	0	0	6	1	0	0	1	0	0	0	0	1	0	2	1	1	0	0	1	1	0	1	1	2	MBO nivo 3	7	0	0	0	296.31	2261.1	301.82	301.83	0	0	0	Vermijdende persoonlijkheids disorder	6	0	0	0
1280	2	1	21	0	0	0	26	1	0	0	6	1	0	0	1	0	0	0	0	1	0	1	0	1	1	0	0	0	1	0	0	2	MBO	4	1	0	0	312.39	300.4	301.9	0	0	0	0	Andere gespecificeerde persoonlijkheids disorder	6	3	0	0
1281	1	1	27	0	0	1	52	0	1	0	6	1	0	0	1	0	0	0	0	1	0	2	0	1	1	0	0	0	0	0	0	5	HBO	10	0	0	0	2261.1		301.82		0	0	0	Vermijdende persoonlijkheids disorder	6	0	0	1
1282	2	1	23	0	0	0	28	1	0	0	6	1	0	0	1	0	0	0	0	1	0	1	0	1	1	0	0	0	1	0	0	4	VMBO	4	1	0	0	309.81		301.83		0	0	0	Posttraumatische stres disorder(incl. Posttraumatische stres disorder bij kinderen van 6 jr en jonger	4	11	0	0
1283	2	1	21	0	0	0	28	1	0	0	6	1	0	0	1	0	0	0	0	1	0	3	0	1	1	0	0	0	1	0	0	3	MBO	4	1	0	0	296.32				0	0	0	Depressieve disorder:recidiverende episode-matig	3	3	0	0
1284	2	1	24	0	0	0	28	1	0	0	6	1	0	0	1	0	0	0	0	1	0	2	0	1	1	0	0	0	0	0	0	4	MBO nivo 4	7	0	0	0								Rouwreactie	0	0	0	1
1285	2	1	25	0	0	0	30	1	0	0	6	1	0	0	1	0	0	0	0	1	0	1	0	1	1	0	0	0	0	0	0	5	HBO	10	0	0	0			301.83		0	0	0	Borderline personality disorder	6	0	0	1
1286	1	1	25	0	0	1	58	0	1	0	6	1	0	0	1	0	0	0	0	1	0	3	0	1	1	0	0	0	1	0	0	6	MAVO	5	1	0	0			301.9		0	0	0	Andere gespecificeerde persoonlijkheids disorder	6	0	0	1
1287	1	1	19	1	0	1	52	0	1	0	6	1	0	0	1	0	0	0	0	1	0	3	1	1	0	1	0	0	1	1	1	2	MBO	4	1	1	1	312.9	2261.1	301.9		0	0	0	Ongespecificeerde disruptieve, impulsbeheersings-of andere gedrags disorder	9	9	1	0
1288	2	1	25	0	0	0	24	1	0	0	6	1	0	0	1	0	0	0	0	1	0	1	0	1	1	0	0	0	0	0	0	4	MBO3	7	0	0	0	2262.2		301.83		0	0	0	Borderline personality disorder	6	0	0	1
1289	2	1	27	0	0	1	46	0	1	0	6	1	0	0	1	0	0	0	0	1	0	2	0	1	1	0	0	0	1	0	0	4	MBO	4	1	0	0	307.51	309.81	301.6	301.9	0	0	0	Afhankelijke persoonlijkheids disorder	6	10	0	0
1290	1	1	12	1	0	1	45	0	1	0	6	1	0	0	1	0	0	0	0	1	0	2	1	1	0	0	1	1	1	1	1	3	MAVO	5	1	1	1	296.34	296.23	799.9	0	0	0	0	Depressieve disorder:recidiverende episode-met psychotische kenmerken	3	3	0	0
1291	1	1	24	0	0	1	46	0	1	0	6	1	0	0	1	0	0	0	0	1	0	2	0	1	1	0	0	0	0	0	0	8	HAVO	8	0	0	0	311	300			0	0	0	Depressieve disorder: recidiverende episode-ernstig	3	3	0	0
1292	1	1	27	0	0	0	31	1	0	0	6	1	0	0	1	0	0	0	0	1	0	1	0	1	1	0	0	0	0	0	0	4	MBO nivo 4	7	0	0	0	296.46	0	301.82	0	0	0	0	Vermijdende persoonlijkheids disorder	6	0	0	0
1293	2	1	23	0	0	2	60	0	0	1	6	1	0	0	1	0	0	0	0	1	0	1	0	1	1	0	0	0	1	0	0	3	LHNO	4	0	0	0								Depressieve disorder:recidiverende episode-matig	3	3	0	1
1294	2	1	20	0	0	1	45	0	1	0	6	1	0	0	1	0	0	0	0	1	0	6	0	1	1	0	0	0	1	0	0	4	Basisonderwijs	1	0	0	0	296.32	0	301.83	301.82	0	0	0	Borderline personality disorder	6	0	0	0
1295	2	1	18	0	0	0	27	1	0	0	6	1	0	0	1	0	0	0	0	1	0	1	1	1	0	1	0	0	1	0	0	4	VMBO	4	1	0	0	309.81		301.83		0	0	0	Borderline personality disorder	6	0	0	0
1296	1	1	14	0	0	2	60	0	0	1	6	1	0	0	1	0	0	0	0	1	0	1	1	1	0	0	1	1	1	0	0	2	MBO 2 jarig	4	0	0	0	296.32	309.81			0	0	0	Depressieve disorder:recidiverende episode-matig	3	3	0	0
1297	2	1	22	0	0	0	33	1	0	0	6	1	0	0	1	0	0	0	0	1	0	1	0	1	1	0	0	0	1	0	1	3	Basisonderwijs	1	0	0	0	300.01	309.81			0	0	0	Paniek disorder	4	2	0	0
1298	1	1	25	0	0	0	33	1	0	0	6	1	2	0	1	0	0	0	0	1	0	1	0	1	1	0	0	0	1	0	0	5	VMBO	4	1	0	0	300	311	301.82		0	0	0	avoidant personality disorder	6	0	0	0
1299	1	1	28	0	0	2	60	0	0	1	6	1	0	0	1	0	0	0	0	1	0	3	0	1	1	0	0	0	0	0	0	5	HAVO	8	0	0	0	309.81		301.9		0	0	0	Posttraumatische stres disorder(incl. Posttraumatische stres disorder bij kinderen van 6 jr en jonger	4	11	0	0
1300	2	1	26	0	0	1	59	0	1	0	6	1	0	0	1	0	0	0	0	1	0	4	0	1	1	0	0	0	0	0	0	6	HAVO	8	0	0	0	298.9	296.03	2271.09	0	0	0	0	Andere gespecificeerde schizophreniaspectrum-of andere psychotische disorder	2	5	0	0
1301	2	1	28	0	0	1	40	0	1	0	6	1	0	0	1	0	0	0	0	1	0	2	0	1	1	0	0	0	0	0	0	6	HBO	10	0	0	0								Bipolaire-II- disorder	3	4	0	1
1302	1	1	20	0	0	0	35	1	0	0	6	1	0	0	1	0	0	0	0	1	0	1	0	1	1	0	0	0	0	0	0	6	MBO-4	7	0	0	0	304.3	303.9	301.9		0	0	0	Ongespecificeerde Persoonlijkheids disorder	6	0	0	0
1303	1	1	20	0	0	1	54	0	1	0	6	1	0	0	1	0	0	0	0	1	0	2	0	1	1	0	0	0	0	0	0	4	MTS	7	0	0	0								Bipolaire-II- disorder:Hypomanisch	3	4	0	1
1304	1	1	26	0	0	0	26	1	0	0	6	1	0	0	1	0	0	0	0	1	0	6	0	1	1	0	0	0	0	0	0		VMBO-TL	6	0	0	0	314.9	2262.2			0	0	0	Ongespecificeerde aandachtsdeficiëntie-/hyperactiviteits disorder	9	9	1	0
1305	2	1	20	0	0	0	31	1	0	0	6	1	0	0	1	0	0	0	0	1	0	1	0	1	1	0	0	0	0	0	0	6.5	MBO-4	7	0	0	0	300.15	309.81	301.83	0	0	0	0	Ongespecificeerde dissociatieve disorder	9	9	0	0
1306	2	1	19	0	0	1	52	0	1	0	6	1	0	0	1	0	0	0	0	1	0	3	1	1	0	1	0	0	1	0	0	4	MBO	4	1	0	0	296.32	2262.81	301.6	301.82	0	0	0	Borderline personality disorder	6	0	0	0
1307	2	1	21	0	0	0	26	1	0	0	6	1	0	0	1	0	0	0	0	1	0	1	0	1	1	0	0	0	1	0	0	4	MBO nivo 3	4	0	0	0			301.82		0	0	0	Vermijdende persoonlijkheids disorder	6	0	0	1
1308	2	1	27	0	0	1	44	0	1	0	6	1	0	0	1	0	0	0	0	1	0	1	0	1	1	0	0	0	0	0	0	4	HBO	10	0	0	0	300.11	309.81			0	0	0	Conversie disorder(functioneel-neurologisch-symptoom disorder)	10	7	0	1
1309	1	1	26	0	0	1	36	0	1	0	6	1	0	0	1	0	0	0	0	1	0	1	0	1	1	0	0	0	0	0	0	5	HAVO	8	0	0	0	299	296.32	301.4	301.6	0	0	0	Autismespectrum disorder	9	9	1	0
1310	1	1	24	0	0	1	55	0	1	0	6	1	0	0	1	0	0	0	0	1	0	6	0	1	1	0	0	0	1	0	0	4	MBO	4	1	0	0	299	300.4	301.82	301.9	0	0	0	Autismespectrum disorder	9	9	1	0
1311	2	1	28	0	0	0	27	1	0	0	6	1	0	0	1	0	0	0	0	1	0	3	0	1	1	0	0	0	0	0	0	5	HBO	10	0	0	0	2261.1		301.82		0	0	0	Vermijdende persoonlijkheids disorder	6	0	0	1
1312	1	1	22	0	0	2	62	0	0	1	6	1	0	0	1	0	0	0	0	1	0	2	0	1	1	0	0	0	0	0	0	3	MTS	7	0	0	0	296.89	309.81	301.83	0	0	0	0	Posttraumatische stres disorder(incl. Posttraumatische stres disorder bij kinderen van 6 jr en jonger	4	11	0	0
1313	1	1	24	1	0	1	49	0	1	0	6	1	0	0	1	0	0	0	0	1	0	2	0	1	1	0	0	0	1	0	0	4	MAVO	5	1	0	0	296.33				0	0	0	Depressieve disorder:recidiverende episode-ernstig	3	3	0	0
1314	1	1	27	0	0	2	62	0	0	1	6	1	0	0	1	0	0	0	0	1	0	2	0	1	1	0	0	0	0	0	0	7	HBO	10	0	0	0	298.9	296.24	799.9	0	0	0	0	Andere gespecificeerde schizophreniaspectrum-of andere psychotische disorder	2	5	0	0
1315	2	1	21	0	0	2	60	0	0	1	6	1	0	0	1	0	0	0	0	1	0	2	0	1	1	0	0	0	1	0	0		MBO	4	1	0	0	309.81				0	0	0	Posttraumatische stres disorder(incl. Posttraumatische stres disorder bij kinderen van 6 jr en jonger	4	11	0	0
1316	2	1	28	0	0	0	34	1	0	0	6	1	0	0	1	0	0	0	0	1	0	2	0	1	1	0	0	0	0	0	0	4	HBO	10	0	0	0	298.9	307.5	301.82	301.83	0	0	0	Ongespecificeerde schizophreniaspectrum - of andere psychotische disorder	2	5	0	0
1317	2	1	15	0	0	1	39	0	1	0	6	1	0	0	1	0	0	0	0	1	0	3	1	1	0	0	1	1	1	1	1	0	Geen	0	0	0	0	309.81		301	301.82	0	0	0	Posttraumatische stress disorder (incl. de posttraumatische- stress disorder bij kinderen van 6 jaar en jonger)	4	11	0	0
1318	1	1	24	0	0	0	31	1	0	0	6	1	0	0	1	0	0	0	0	1	0	1	0	1	1	0	0	0	1	0	0	4	MBO	4	1	0	0	309.81				0	0	0	Posttraumatische stress disorder	4	11	0	0
1319	2	1	22	0	0	0	33	1	0	0	6	1	0	0	1	0	0	0	0	1	0	3	0	1	1	0	0	0	1	0	0	4	Mavo	5	1	0	0	296.23	303.9	301.82	0	0	0	0	Depressieve disorder: eenmalige episode-ernstig	3	3	0	0
1320	1	1	25	0	0	0	34	1	0	0	6	1	0	0	1	0	0	0	0	1	0	2	0	1	1	0	0	0	1	0	0	4	Geen	0	0	0	0	305.7	305.9	301.81		0	0	0	Posttraumatische stress disorder (incl. de posttraumatische- stress disorder bij kinderen van 6 jaar en jonger)	4	11	0	0
1321	2	1	24	0	0	1	46	0	1	0	6	1	0	0	1	0	0	0	0	1	0	1	0	1	1	0	0	0	1	0	0	4	MBO	4	1	0	0	296.31	2261.1	301.6	301.82	0	0	0	Depressieve disorder: eenmalige episode-matig	3	3	0	0
1322	2	1	13	0	0	1	39	0	1	0	6	1	0	0	1	0	0	0	0	1	0	1	1	1	0	0	1	1	1	0	0	4	LBO	4	0	0	0	309.81	2261.2	301.9		0	0	0	PTDS chronic	4	11	0	0
1323	2	1	99	0	0	1	48	0	1	0	6	1	0	0	1	0	0	0	0	1	0	2	99	0	9	9	9	9	1	0	0	5	LEAO d-niveau afgerond	4	0	0	0	296.89	0	301.6	301.82	0	0	0	Bipolaire-II- disorder	3	4	0	0
1324	2	1	99	0	0	1	53	0	1	0	6	1	0	0	1	0	0	0	0	1	0	99	99	0	9	9	9	9	9	99	99			99	99	99	99	309.81		301.82		0	0	0	Posttraumatic stress- disorder	4	11	0	0
1325	2	1	99	0	0	2	64	0	0	1	6	1	0	0	1	0	0	0	0	1	0	99	99	0	9	9	9	9	9	99	99			99	99	99	99	296.3	309.81	301.6	301.82	0	0	0	Afhankelijke persoonlijkheidsst.	6	3	0	0
1326	1	1	26	1	0	1	53	0	1	0	6	1	0	0	1	0	0	0	0	1	0	3	0	1	1	0	0	0	0	0	0	4	MEAO	7	0	0	0	300.01	0	301.4	301.6	0	0	0	Dwangmatige persoonlijkheids disorder	6	0	0	0
1327	2	1	99	0	0	1	42	0	1	0	6	1	0	0	1	0	0	0	0	1	0	2	99	0	9	9	9	9	0	0	0	4	HBO	10	0	0	0	312.3	0	301.9	0	0	0	0	Vermijdende persoonlijkheids disorder	6	0	0	0
1328	1	1	99	0	0	1	45	0	1	0	6	1	0	0	1	0	0	0	0	1	0	6	99	0	9	9	9	9	0	0	0	6	HBO	10	0	0	0	314		301.82		0	0	0	avoidant personality disorder	6	0	1	0
1329	1	1	17	0	0	1	53	0	1	0	6	1	0	0	1	0	0	0	0	1	0	3	1	1	0	1	0	0	1	0	0		Basisonderwijs	1	0	0	0	311	309.81	2271.09	0	0	0	0	Depressieve disorder: Eenmalige episode, Niet-gespecificeerd	3	3	0	0
1330	2	1	23	0	0	0	33	1	0	0	6	1	0	0	1	0	0	0	0	1	0	2	0	1	1	0	0	0	0	0	0	6	HBO	10	0	0	0	300.23	300.02	301.6	301.82	0	0	0	Autismespectrum disorder	9	9	0	0
1331	1	1	99	0	0	2	60	0	0	1	6	1	0	0	1	0	0	0	0	1	0	6	99	0	9	9	9	9	1	0	0	5	LEAO	4	0	0	0	296.33				0	0	0	Personality disorder nao	6	0	0	0
1332	1	1	23	0	0	1	44	0	1	0	6	1	0	0	1	0	0	0	0	1	0	1	0	1	1	0	0	0	1	0	0	1	Geen	0	0	0	0	296.22	300.9			0	0	0	Depressieve disorder: eenmalig episode_matig	3	3	0	0
1333	2	1	26	0	0	1	43	0	1	0	6	1	0	0	1	0	0	0	0	1	0	2	0	1	1	0	0	0	0	0	0	5	HAVO	8	0	0	0	300.01	300.22			0	0	0	Paniek disorder zonder agorafobie	4	2	0	0
1334	2	1	19	0	0	0	27	1	0	0	6	1	0	0	1	0	0	0	0	1	0	1	1	1	0	1	0	0	0	0	1	3	VMBO-tl	6	0	0	0	300.23		301.6	301.82	0	0	0	Sociale angst disorder (sociale fobie)	4	2	0	0
1335	2	1	99	0	0	1	40	0	1	0	6	1	0	0	1	0	0	0	0	1	0	99	99	0	9	9	9	9	9	99	99			99	99	99	99	296.36	0	301.6	0	0	0	0	Afhankelijke persoonlijkheidsst.	6	3	0	0
1336	1	1	20	0	0	1	46	0	1	0	6	1	0	0	1	0	0	0	0	1	0	2	0	1	1	0	0	0	1	0	0	2	LBO	4	0	0	0	2261.1	312.34			0	0	0	Andere gespecificeerde disruptieve, impulsbeheersings-of andere gedrags disorder	4	2	0	1
1337	2	1	99	0	0	1	45	0	1	0	6	1	0	0	1	0	0	0	0	1	0	3	99	0	9	9	9	9	0	0	0	5	HBO	10	0	0	0	309.81	300.82	301.9	0	0	0	0	Ongespecificeerde somatisch-symptoom disorder of verwante disorder	2	5	0	0
1338	2	1	99	0	0	1	39	0	1	0	6	1	0	0	1	0	0	0	0	1	0	99	99	0	9	9	9	9	9	99	99			99	99	99	99	296.31				0	0	0	Depressieve st. recidiv. licht	3	3	0	0
1340	2	1	25	0	0	1	38	0	1	0	6	1	0	0	1	0	0	0	0	1	0	2	0	1	1	0	0	0	0	0	0	4	MBO-4	7	0	0	0	296.32	300	301.4	301.6	0	0	0	Depressieve disorder: Recidive Medium	3	3	0	0
1341	2	1	10	0	0	0	30	1	0	0	6	1	0	0	1	0	0	0	0	1	0	3	1	1	0	0	1	1	1	0	0		IVBO	3	0	0	0	307.5	300.22	2262.89		0	0	0	Agorafobie zonder paniek disorder in de voorgeschiedenis	4	10	0	0
1342	2	1	23	0	0	0	35	1	0	0	6	1	0	0	1	0	0	0	0	1	0	2	0	1	1	0	0	0	0	0	0	4	MBO-plus	7	1	0	0	314.9		301.9		0	0	0	Depressieve disorder: Eenmalige episode, Matig	3	3	1	0
1343	2	1	99	0	0	0	32	1	0	0	6	1	0	0	1	0	0	0	0	1	0	6	99	0	9	9	9	9	0	0	0	6	HBO	10	0	0	0	300.3	0	799.9	0	0	0	0	Obsessieve- compulsieve disorder	4	2	0	0
1344	1	1	99	0	0	1	52	0	1	0	6	1	0	0	1	0	0	0	0	1	0	99	99	0	9	9	9	9	9	99	99			99	99	99	99	296.32	2262.81	301.9	301.82	0	0	0	schizophrenia, ongedifferent. type	2	6	0	0
1345	1	1	18	0	0	1	39	0	1	0	6	1	0	0	1	0	0	0	0	1	0	6	1	1	0	1	0	0	1	0	0	4	LBO	4	0	0	0	312.9	305.7	301.81		0	0	0	disorder in de impulsbeheersing NAO	0	1	1	0
1346	2	1	19	0	0	1	46	0	1	0	6	1	0	0	1	0	0	0	0	1	0	3	1	1	0	1	0	0	1	0	0	1	Basisonderwijs	1	0	0	0	309.81	296.32	301.6	301.82	0	0	0	Posttraumatische stress disorder(incl. Posttraumatische stress disorder bij kinderen van 6 jr en jonger	4	11	0	0
1347	2	1	99	0	0	0	30	1	0	0	6	1	0	0	1	0	0	0	0	1	0	99	99	0	9	9	9	9	9	99	99			99	99	99	99	309.81		301.9		0	0	0	Persoonlijkheids disorder NAO	6	0	0	0
1348	1	1	16	0	0	1	49	0	1	0	6	1	0	0	1	0	0	0	0	1	0	3	1	1	0	1	0	0	1	0	0	6	Geen	0	0	0	0	300.01				0	0	0	Paniek disorder	4	2	0	0
1349	1	1	21	0	0	1	53	0	1	0	6	1	0	0	1	0	0	0	0	1	0	2	0	1	1	0	0	0	1	0	0	4	LTS	4	0	0	0	296.36	303.9	301.82	301.9	0	0	0	Depressieve disorder: recidiverende episode-gedeeltelijk in remissie	3	3	0	0
1350	2	1	99	0	0	1	48	0	1	0	6	1	0	0	1	0	0	0	0	1	0	3	99	0	9	9	9	9	1	0	0	4	MBO	4	1	0	0	295.4				0	0	0	Schizofreniforme disorder	2	6	0	0
1351	2	1	99	1	0	1	48	0	1	0	6	1	0	0	1	0	0	0	0	1	0	2	99	0	9	9	9	9	1	0	0	4	LHNO	4	0	0	0	309.81	304.3			0	0	0	Posttraumatische stress disorder (incl. de posttraumatische stress disorder bij kinderen van 6 jaar en jonger)	4	11	0	0
1352	2	1	14	1	0	1	50	0	1	0	6	1	2	0	1	0	0	0	0	1	0	2	1	1	0	0	1	1	1	1	1	0	Geen	0	0	0	0	309.81	296.3	301.9	301.83	0	0	0	Posttraumatische stress disorder(incl. Posttraumatische stress disorder bij kinderen van 6 jr en jonger	4	11	0	0
1353	2	1	99	0	0	1	36	0	1	0	6	1	0	0	1	0	0	0	0	1	0	2	99	0	9	9	9	9	0	2	2		HBO	10	0	0	0	300.4	0	301.83	0	0	0	0	Borderline personality disorder	6	0	0	0
1354	2	1	99	0	0	0	26	1	0	0	6	1	0	0	1	0	0	0	0	1	0	6	99	0	9	9	9	9	1	0	0	4	VMBO	4	1	0	0	312.34	304.8	301.83	0	0	0	0	Borderline personality disorder	6	0	0	0
1355	2	1	99	0	0	1	46	0	1	0	6	1	0	0	1	0	0	0	0	1	0	99	99	0	9	9	9	9	9	99	99			99	99	99	99	309.81	296.36	301.82	0	0	0	0	Posttraumatic stress- disorder	4	11	0	0
1356	2	1	22	0	0	2	60	0	0	1	6	1	0	0	1	0	0	0	0	1	0	2	0	1	1	0	0	0	1	0	0	4	MBO	4	1	0	0	296.56	0	2271.09	0	0	0	0	Bipolaire-I- disorder: actuele of meest recente episode manisch-volledig in remissie	3	4	0	0
1357	2	1	99	0	0	1	36	0	1	0	6	1	0	0	1	0	0	0	0	1	0	1	99	0	9	9	9	9	0	0	0	6	havo	8	0	0	0								Borderline personality disorder	6	0	0	1
1358	2	1	24	0	0	1	49	0	1	0	6	1	0	0	1	0	0	0	0	1	0	3	0	1	1	0	0	0	1	0	0	4	KBO Detailhandel	4	1	0	0	299.8	300.21	301.82		0	0	0	Autismespectrum disorder	9	9	1	0
1359	2	1	99	0	0	1	54	0	1	0	6	1	0	0	1	0	0	0	0	1	0	99	99	0	9	9	9	9	9	99	99			99	99	99	99	300.02	0	301.81	0	0	0	0	Syndroom van Rett	9	9	1	0
1360	2	1	99	0	0	0	26	1	0	0	6	1	0	0	1	0	0	0	0	1	0	99	99	0	9	9	9	9	9	99	99			99	99	99	99									0	0	0	1
1361	2	1	18	0	0	0	29	1	0	0	6	1	0	0	1	0	0	0	0	1	0	2	1	1	0	1	0	0	1	0	0	4	MBO- 2jarig	4	0	0	0	300.21	2262.82	2271.09	0	0	0	0	Paniek disorder met agorafobie	4	2	0	0
1362	1	1	24	0	0	1	45	0	1	0	6	1	0	0	1	0	0	0	0	1	0	2	0	1	1	0	0	0	0	0	0	7	VWO	9	0	0	0	312.3	300.4	301.81	0	0	0	0	Narcisitische Persoonlijkheids disorder	6	0	0	0
1363	1	1	99	0	0	1	36	0	1	0	6	1	0	0	1	0	0	0	0	1	0	99	99	0	9	9	9	9	9	99	99			99	99	99	99	311	314	317	301.9	0	0	0		0	0	1	0
1364	1	1	99	0	0	1	37	0	1	0	6	1	0	0	1	0	0	0	0	1	0	99	99	0	9	9	9	9	9	99	99			99	99	99	99	296.36	0	2271.09	0	0	0	0	Depress. st. recidiv.vol.remissie	3	3	0	0
1365	2	1	99	0	0	0	28	1	0	0	6	1	0	0	1	0	0	0	0	1	0	1	99	0	9	9	9	9	0	0	0	5	HAVO	8	0	0	0	300.3				0	0	0	Obsessieve- compulsieve disorder	4	2	0	0
1366	2	1	22	0	0	1	47	0	1	0	6	1	0	0	1	0	0	0	0	1	0	1	0	1	1	0	0	0	1	0	0	4	LHNO	4	0	0	0			301.82		0	0	0	Depressieve disorder: recidiverende episode-matig	3	3	0	1
1367	1	1	99	0	0	1	36	0	1	0	6	1	0	0	1	0	0	0	0	1	0	1	99	0	9	9	9	9	1	0	0	4	Basisonderwijs	1	0	0	0	309.81	300.21	301.82	0	0	0	0	Posttraumatische stress disorder (incl. de posttraumatische stress disorder bij kinderen van 6 jaar en jonger)	4	11	0	0
1368	1	1	99	0	0	1	57	0	1	0	6	1	0	0	1	0	0	0	0	1	0	2	99	0	9	9	9	9	0	0	0	6	WO	11	0	0	0	296.36	0	301.9	301.82	0	0	0	Depressieve disorder:recidiverende episode-gedeeltelijk in remissie	3	3	0	0
1369	2	1	99	0	0	1	40	0	1	0	6	1	0	0	1	0	0	0	0	1	0	3	99	0	9	9	9	9	1	0	0		VMBO	4	1	0	0	2262.81	296.36	301.83		0	0	0	Depressieve disorder:recidiverende episode-gedeeltelijk in remissie	3	3	0	1
1370	1	1	25	0	0	1	50	0	1	0	6	1	0	0	1	0	0	0	0	1	0	1	0	1	1	0	0	0	0	0	0	5	MEAO	7	0	0	0	296.36		301.81	301.82	0	0	0	Vermijdende persoonlijkheids disorder	6	0	0	0
1371	1	1	27	0	0	1	40	0	1	0	6	1	0	0	1	0	0	0	0	1	0	1	0	1	1	0	0	0	0	0	0	4	MBO 3-4 jarig	7	0	0	0	296.32				0	0	0	Depressieve disorder: Recidive Medium	3	3	0	0
1372	2	1	23	0	0	0	21	1	0	0	6	1	0	0	1	0	0	0	0	1	0	1	0	1	1	0	0	0	1	0	0	2	MBO nivo1	4	0	0	0	296.89	299.8	2271.09	0	0	0	0	Bipolaire II disorder	3	4	1	0
1373	1	1	28	0	0	1	54	0	1	0	6	1	0	0	1	0	0	0	0	1	0	2	0	1	1	0	0	0	0	0	0	5	VWO	9	0	0	0	296.33		301.4	301.6	0	0	0	Depressieve disorder:recidiverende episode-ernstig	3	3	0	0
1374	1	1	13	1	0	1	37	0	1	0	6	1	0	0	1	0	0	0	0	1	0	2	1	1	0	0	1	1	1	1	1	0	MBO	4	1	0	0	296.23	300.02	799.9	0	0	0	0	Depressieve disorder: eenmalige episode-ernstig	3	3	0	0
1375	2	1	99	0	0	0	30	1	0	0	6	1	0	0	1	0	0	0	0	1	0	99	99	0	9	9	9	9	9	99	99			99	99	99	99									0	0	0	1
1376	2	1	99	0	0	0	27	1	0	0	6	1	0	0	1	0	0	0	0	1	0	1	99	0	9	9	9	9	0	0	0		HBO	10	0	0	0	309.81	300.01	301.9		0	0	0	Andere gespecificeerde persoonlijkheids disorder	6	11	0	0
1377	1	1	99	0	0	1	37	0	1	0	6	1	0	0	1	0	0	0	0	1	0	6	99	0	9	9	9	9	1	0	0		MBO	4	1	0	0								Andere gespecificeerde disruptieve, impulsbeheersings-of andere gedrags disorder	4	2	0	1
1379	2	1	24	0	0	0	29	1	0	0	6	1	0	0	1	0	0	0	0	1	0	3	0	1	1	0	0	0	0	0	0	4	MBO(SPW)	7	0	0	0	309.81		301.82	301.83	0	0	0	Posttraumatic stress- disorder	4	11	0	0
1380	1	1	99	0	0	1	43	0	1	0	6	1	0	0	1	0	0	0	0	1	0	99	99	0	9	9	9	9	9	99	99			99	99	99	99									0	0	0	1
1381	1	1	24	0	0	2	65	0	0	1	6	1	0	0	1	0	0	0	0	1	0	1	0	1	1	0	0	0	0	0	0	6	HBS_A	9	0	0	0	312.34	0	799.9	0	0	0	0	Periodieke explosieve disorder	9	9	0	0
1382	2	1	99	0	0	1	56	0	1	0	6	1	0	0	1	0	0	0	0	1	0	99	99	0	9	9	9	9	9	99	99			99	99	99	99	296.32		301.82	301.9	0	0	0	Depressieve st. recidiv. matig	3	3	0	0
1383	1	1	99	0	0	1	47	0	1	0	6	1	0	0	1	0	0	0	0	1	0	1	99	0	9	9	9	9	0	0	0		HAVO	8	0	0	0	296.32		301.6	301.82	0	0	0	Depressieve disorder:eenmalige episode-matig	3	3	0	0
1384	1	1	26	0	0	1	48	0	1	0	6	1	0	0	1	0	0	0	0	1	0	3	0	1	1	0	0	0	0	0	0	6	WO	11	0	0	0	296.31	2261.1	301.82	0	0	0	0	Vermijdende persoonlijkheids disorder	6	0	0	0
1385	2	1	17	0	0	1	41	0	1	0	6	1	0	0	1	0	0	0	0	1	0	2	1	1	0	1	0	0	0	0	0	5	WO	11	0	0	0	296.31	0	301.82	301.6	0	0	0	Depressieve disorder:recidiverende episode-licht	3	3	0	0
1386	2	1	99	0	0	1	36	0	1	0	6	1	0	0	1	0	0	0	0	1	0	99	99	0	9	9	9	9	9	99	99			99	99	99	99	302.7	0	2271.09	0	0	0	0	Parafilie NAO	4	2	0	1
1387	2	1	99	0	0	0	30	1	0	0	6	1	0	0	1	0	0	0	0	1	0	1	99	0	9	9	9	9	1	0	1		Basisonderwijs (speciaal)	2	0	0	0	296.22	309.81			0	0	0	niet aanwezig	0	0	0	0
1388	1	1	99	0	0	1	47	0	1	0	6	1	0	0	1	0	0	0	0	1	0	99	99	0	9	9	9	9	9	99	99			99	99	99	99	296.36	312.9	301.9	0	0	0	0	Narcistische persoonlijkheidsst.	6	0	0	0
1389	2	1	99	0	0	0	27	1	0	0	6	1	0	0	1	0	0	0	0	1	0	1	99	0	9	9	9	9	0	0	0	5	HBO	10	0	0	0			301.81	301.83	0	0	0	Narcistische persoonlijkheids disorder	6	0	0	1
1390	2	1	23	0	0	1	52	0	1	0	6	1	0	0	1	0	0	0	0	1	0	2	0	1	1	0	0	0	1	0	0	5	MBO	4	1	0	0	300.01				0	0	0	Andere gespecificeerde persoonlijkheids disorder	6	2	0	0
1391	2	1	99	0	0	1	46	0	1	0	6	1	0	0	1	0	0	0	0	1	0	2	99	0	9	9	9	9	1	0	0	4	LBO	4	0	0	0	311		301.82		0	0	0	avoidant personality disorder	6	0	0	0
1392	2	1	28	0	0	1	44	0	1	0	6	1	0	0	1	0	0	0	0	1	0	2	0	1	1	0	0	0	0	0	0	5	HBO/WO	10	0	0	0	2261.1	0	301.9	301.4	0	0	0	Andere gespecificeerde persoonlijkheids disorder	6	0	0	1
1393	2	1	20	0	0	1	53	0	1	0	6	1	0	0	1	0	0	0	0	1	0	2	0	1	1	0	0	0	1	0	0	4	MAVO	5	1	0	0	300	296.31	301.83	301.6	0	0	0	Afhankelijke persoonlijkheids disorder	2	2	0	0
1394	2	1	25	0	0	1	44	0	1	0	6	1	0	0	1	0	0	0	0	1	0	2	0	1	1	0	0	0	0	0	0	7	HBO	10	0	0	0	300.02	300.4	301.6	0	0	0	0	Depressieve disorder: recidiverende episode-licht	3	3	0	0
1395	1	1	12	1	0	1	53	0	1	0	6	1	0	0	1	0	0	0	0	1	0	2	1	1	0	0	1	1	1	1	0	3	Geen	0	0	0	0	296.31	2262.2	301.6	0	0	0	0	Depressieve disorder:recidiverende episode-licht	3	3	0	0
1396	2	1	99	0	0	0	33	1	0	0	6	1	0	0	1	0	0	0	0	1	0	1	99	0	9	9	9	9	1	0	0	4	Basisonderwijs	1	0	0	0	296.36	309.81	301.82	301.83	0	0	0	avoidant personality disorder	6	0	0	0
1397	1	1	21	0	0	0	32	1	0	0	6	1	0	0	1	0	0	0	0	1	0	1	0	1	1	0	0	0	1	0	0	2	Geen	0	0	0	0	300.23		301.6	301.82	0	0	0	Sociale angst disorder (sociale fobie)	4	2	0	0
1398	1	1	25	0	0	1	58	0	1	0	6	1	0	0	1	0	0	0	0	1	0	2	0	1	1	0	0	0	0	0	0	6	MAVO-4	6	0	0	0			301.6	301.82	0	0	0	Autismespectrum disorder	9	9	0	1
1399	2	1	99	0	0	0	31	1	0	0	6	1	0	0	1	0	0	0	0	1	0	2	99	0	9	9	9	9	1	0	0		MBO	4	1	0	0	296.32	2261.2	301.82		0	0	0	Depressieve periode:recidiverende episode-matig	3	3	0	0
1400	2	1	99	0	0	1	46	0	1	0	6	1	0	0	1	0	0	0	0	1	0	1	99	0	9	9	9	9	1	0	0	4	LBO	4	0	0	0	300.02	309.81	301.83	0	0	0	0	Gegeneraliseerde angst disorder en Borderline personality disorder	6	2	0	0
1401	2	1	21	0	0	1	53	0	1	0	6	1	0	0	1	0	0	0	0	1	0	3	0	1	1	0	0	0	1	0	0	4	MBO	4	1	0	0	296.33		301.9		0	0	0	Bipolaire II disorder	3	4	0	0
1402	1	1	99	1	0	1	37	0	1	0	6	1	0	0	1	0	0	0	0	1	0	99	99	0	9	9	9	9	9	99	99			99	99	99	99	296.22	309			0	0	0	Depressieve st. eenm.epi. matig	3	3	0	0
1403	1	1	99	0	0	0	22	1	0	0	6	1	0	0	1	0	0	0	0	1	0	99	99	0	9	9	9	9	9	99	99			99	99	99	99	299.8	2261.2			0	0	0	Syndroom van Rett	9	9	1	0
1404	2	1	99	0	0	0	30	1	0	0	6	1	0	0	1	0	0	0	0	1	0	99	99	0	9	9	9	9	9	99	99			99	99	99	99	300.21	299.8			0	0	0	Paniek disorder met agorafobie	4	2	1	0
1405	2	1	99	0	0	1	45	0	1	0	6	1	0	0	1	0	0	0	0	1	0	99	99	0	9	9	9	9	9	99	99			99	99	99	99	314.9	309.81	301.9		0	0	0	ADHD	9	9	1	0
1406	1	1	99	0	0	1	43	0	1	0	6	1	0	0	1	0	0	0	0	1	0	2	99	0	9	9	9	9	1	0	0	4	LEAO	4	0	0	0	300	2261.1	301.4	301.6	0	0	0	Ongespecificeerde angst disorder	9	9	0	0
1407	2	1	99	0	0	1	46	0	1	0	6	1	0	0	1	0	0	0	0	1	0	3	99	0	9	9	9	9	0	0	0		MEAO	7	0	0	0	300.4	2261.2	301.83	0	0	0	0	Borderline personality disorder	6	0	0	0
1408	1	1	99	0	0	0	27	1	0	0	6	1	0	0	1	0	0	0	0	1	0	1	99	0	9	9	9	9	9	1	1			99	99	99	99	309.81	296.32	301.9	0	0	0	0	Posttraumatic stress- disorder	4	11	0	0
1409	2	1	99	0	0	1	41	0	1	0	6	1	0	0	1	0	0	0	0	1	0	99	99	0	9	9	9	9	9	99	99			99	99	99	99	296.31	302.6	799.9	0	0	0	0	Depressieve st. recidiv. licht	3	3	0	0
1410	2	1	99	0	0	1	55	0	1	0	6	1	0	0	1	0	0	0	0	1	0	3	99	0	9	9	9	9	1	0	0		Huishoudschool	4	0	0	0	311	2262.82	301.82		0	0	0	niet aanwezig	0	0	0	0
1411	1	1	99	0	0	0	23	1	0	0	6	1	0	0	1	0	0	0	0	1	0	99	99	0	9	9	9	9	9	99	99			99	99	99	99	299	309.81	301.9	0	0	0	0	Posttraumatic stress- disorder	4	11	1	0
1412	2	1	99	0	0	1	40	0	1	0	6	1	0	0	1	0	0	0	0	1	0	6	99	0	9	9	9	9	1	0	0		Basisonderwijs	1	0	0	0	296.31		301.82		0	0	0	Depressieve disorder:recidiverend-matig	3	3	0	0
1414	2	1	24	0	0	1	44	0	1	0	6	1	0	0	1	0	0	0	0	1	0	3	0	1	1	0	0	0	1	0	0	5	MAVO	5	1	0	0			301.9		0	0	0	Ongespeciviseerde persoonlijkheids disorder	2	5	0	1
1415	2	1	99	0	0	1	46	0	1	0	6	1	0	0	1	0	0	0	0	1	0	99	99	0	9	9	9	9	9	99	99			99	99	99	99	296.89	303.9			0	0	0	Bipolaire II disorder	3	4	0	0
1416	1	1	99	0	0	1	36	0	1	0	6	1	0	0	1	0	0	0	0	1	0	99	99	0	9	9	9	9	9	99	99			99	99	99	99	296.32		301.83		0	0	0	Depressieve st. recidiv. matig	3	3	0	0
1417	2	1	99	0	0	0	28	1	0	0	6	1	0	0	1	0	0	0	0	1	0	99	99	0	9	9	9	9	9	99	99			99	99	99	99	300.81	300.15	301.9		0	0	0	Depressieve st. eenm.epi. matig	3	3	0	0
1418	2	1	21	0	0	0	26	1	0	0	6	1	0	0	1	0	0	0	0	1	0	1	0	1	1	0	0	0	1	0	0	5	MBO	4	1	0	0	307.5	296.25	301.9	301.83	0	0	0	Ongespecificeerde Persoonlijkheids disorder	6	0	0	0
1419	2	1	99	0	0	1	38	0	1	0	6	1	0	0	1	0	0	0	0	1	0	99	99	0	9	9	9	9	9	99	99			99	99	99	99	296.36		301.4	301.6	0	0	0	Depress. st. recidiv.vol.remissie	3	3	0	0
1420	1	1	27	0	0	1	51	0	1	0	6	1	0	0	1	0	0	0	0	1	0	2	0	1	1	0	0	0	0	0	0	5	HAVO	8	0	0	0			301.6	301.82	0	0	0	Vermijdende persoonlijkheids disorder	6	0	0	1
1421	2	1	17	0	0	0	32	1	0	0	6	1	0	0	1	0	0	0	0	1	0	1	1	1	0	1	0	0	1	0	0	4	BBL zorg en welzijn	4	0	0	0	311	2261.1	301.82		0	0	0	Borderline personality disorder	6	0	0	0
1422	2	1	27	0	0	1	40	0	1	0	6	1	0	0	1	0	0	0	0	1	0	6	0	1	1	0	0	0	0	0	0	5	MEAO secretarieel	7	0	0	0	296.36		301.6	301.82	0	0	0	Afhankelijke persoonlijkheids disorder	6	3	0	0
1423	2	1	26	0	0	1	55	0	1	0	6	1	0	0	1	0	0	0	0	1	0	6	0	1	1	0	0	0	0	0	0	6	HBO	10	0	0	0	296.32	300	301.6	0	0	0	0	Depressieve disorder:recidiverende episode-matig	3	3	0	0
1424	1	1	99	0	0	1	46	0	1	0	6	1	0	0	1	0	0	0	0	1	0	99	99	0	9	9	9	9	9	99	99			99	99	99	99	296.32	300.02			0	0	0	Depressieve st. recidiv. matig	3	3	0	0
1425	2	1	99	0	0	1	57	0	1	0	6	1	0	0	1	0	0	0	0	1	0	2	99	0	9	9	9	9	1	0	0		MBO	4	1	0	0	296.32	300.15	301.82	0	0	0	0	Depressieve disorder:recidiverende episode-matig	3	3	0	0
1426	2	1	99	0	0	0	24	1	0	0	6	1	0	0	1	0	0	0	0	1	0	99	99	0	9	9	9	9	9	99	99			99	99	99	99	300.22	307.51	301.83		0	0	0	Bulimia nervosa	4	10	0	0
1427	1	1	16	0	0	1	44	0	1	0	6	1	0	0	1	0	0	0	0	1	0	1	1	1	0	1	0	0	1	0	0	4	MBO- 2 jarig	4	0	0	0	296.33				0	0	0	Depressieve disorder: Recidiverend, Ernstig zonder psychotische kenmerken	3	3	0	0
1429	2	1	24	0	0	0	35	1	0	0	6	1	0	0	1	0	0	0	0	1	0	1	0	1	1	0	0	0	1	0	0	4	MBO	4	1	0	0	300.4	300.81	301.9	301.82	0	0	0	Vermijdende persoonlijkheids disorder	6	0	0	0
1430	1	1	23	0	0	1	44	0	1	0	6	1	0	0	1	0	0	0	0	1	0	1	0	1	1	0	0	0	1	0	0	6	MAVO	5	1	0	0	299.8	296.9	300.9	0	0	0	0	Autismespectrum disorder	9	9	1	0
1431	2	1	23	0	0	2	60	0	0	1	6	1	0	0	1	0	0	0	0	1	0	1	0	1	1	0	0	0	1	0	0	6	MBO	4	1	0	0	300.9				0	0	0	Antisociale persoonlijkheids disorder	6	5	0	0
1432	2	1	17	0	0	1	47	0	1	0	6	1	2	0	1	0	0	0	0	1	1	3	1	1	0	1	0	0	9	2	2		?	99	99	99	99	296.22	309			0	0	0	Depressieve disorder: Eenmalige episode, Matig	3	3	0	0
1433	2	1	14	0	0	1	54	0	1	0	6	1	0	0	1	0	0	0	0	1	0	2	1	1	0	0	1	1	1	0	0	3	Basisonderwijs	1	0	0	0	309.81	298.9	301.9	0	0	0	0	PTDS chronic	4	11	0	0
1434	1	1	99	0	0	1	40	0	1	0	6	1	0	0	1	0	0	0	0	1	0	99	99	0	9	9	9	9	9	99	99			99	99	99	99	299	314.9			0	0	0	ADHD	9	9	1	0
1435	2	1	20	0	0	2	60	0	0	1	6	1	0	0	1	0	0	0	0	1	0	2	0	1	1	0	0	0	1	0	0	7	MAVO/VMBO	4	1	0	0	296.32	2262.2			0	0	0	Depressieve disorder:recidiverende episode-matig	3	3	0	0
1436	1	1	15	0	0	1	42	0	1	0	6	1	0	0	1	0	0	0	0	1	0	3	1	1	0	0	1	1	1	0	0		LHNO	4	0	0	0	296.54				0	0	0	Bipolaire I disorder: Laatste episode depressief, Ernstig met psychotische kenmerken	3	4	0	0
1437	2	1	99	0	0	1	59	0	1	0	6	1	0	0	1	0	0	0	0	1	0	1	99	0	9	9	9	9	9	0	0		?	99	99	0	0	300.3	300.4	301.4	301.82	0	0	0	Obsessieve- compulsieve disorder	4	2	0	0
1438	2	1	11	0	0	0	31	1	0	0	6	1	0	0	1	0	0	0	0	1	0	3	1	1	0	0	1	1	1	0	0	4	VMBO kader	4	0	0	0	799.9		301.9		0	0	0	Ongespecificeerde Persoonlijkheids disorder	6	0	0	0
1439	1	1	99	0	0	1	41	0	1	0	6	1	0	0	1	0	0	0	0	1	0	2	99	0	9	9	9	9	1	0	0	4	LTS	4	0	0	0	300.02	2262.2	301.82	0	0	0	0	Ongespecificeerde angst disorder	9	9	0	0
1440	1	1	99	0	0	1	58	0	1	0	6	1	0	0	1	0	0	0	0	1	0	99	99	0	9	9	9	9	9	99	99			99	99	99	99	296.26	0	301.6	301.82	0	0	0	Afhankelijke persoonlijkheidsst.	6	3	0	0
1441	2	1	24	0	0	1	58	0	1	0	6	1	0	0	1	0	0	0	0	1	0	1	0	1	1	0	0	0	1	0	0	6	MBO	4	1	0	0	296.32		301.4	301.6	0	0	0	Depressieve disorder:recidiverende episode-matig	3	3	0	0
1442	1	1	99	0	0	1	37	0	1	0	6	1	0	0	1	0	0	0	0	1	0	99	99	0	9	9	9	9	9	99	99			99	99	99	99	313.82	311	301.81	301.82	0	0	0	Depressieve disorder NAO	3	3	1	0
1443	1	1	99	0	0	1	45	0	1	0	6	1	0	0	1	0	0	0	0	1	0	3	99	0	9	9	9	9	1	0	0		VMBO	4	1	0	0	296.32	307.23	301.9	301.83	0	0	0	Depressieve disorder: Recidive Medium	3	3	0	0
1444	2	1	99	0	0	1	37	0	1	0	6	1	0	0	1	0	0	0	0	1	0	1	99	0	9	9	9	9	1	0	1		Basisonderwijs	1	0	0	0	300.21	0	799.9	0	0	0	0	Paniek disorder	4	2	0	0
1446	2	1	26	0	0	1	47	0	1	0	6	1	0	0	1	0	0	0	0	1	0	3	0	1	1	0	0	0	0	0	0	5	HBO	10	0	0	0	311		301.9		0	0	0	Depressieve disorder:recidiverende episode-ongespecificeerd	3	3	0	0
1447	1	1	99	1	0	1	45	0	1	0	6	1	0	0	1	0	0	0	0	1	0	2	99	0	9	9	9	9	9	2	2		onbekend	99	99	99	99	296.34	0	799.9	0	0	0	0	Depressieve disorder: Recidiverend, Ernstig met psychotische kenmerken	3	3	0	0
1448	2	1	11	1	0	0	25	1	0	0	6	1	0	0	1	0	0	0	0	1	0	3	1	1	0	0	1	1	1	1	1	0	MBO nivo 1	4	0	0	0	309.81	291.9	301.9	0	0	0	0	Posttraumatische stress disorder (incl. de posttraumatische- stress disorder bij kinderen van 6 jaar en jonger)	4	11	0	0
1449	2	1	99	0	0	1	49	0	1	0	6	1	0	0	1	0	0	0	0	1	0	3	99	0	9	9	9	9	1	0	0	4	LEAO	4	0	0	0	296.32		301.6		0	0	0	Depressieve disorder:recidiverende episode-matig	3	3	0	0
1450	2	1	99	1	0	0	33	1	0	0	6	1	0	0	1	0	0	0	0	1	0	99	99	0	9	9	9	9	9	99	99			99	99	99	99	291.1	311			0	0	0	Angst disordersen	4	3	0	1
1451	2	1	16	0	0	0	27	1	0	0	6	1	0	0	1	0	0	0	0	1	0	1	1	1	0	1	0	0	1	0	0	5	MBO	4	1	2	0	296.89	307.5		301.9	0	0	0	Posttraumatische stress disorder(incl. Posttraumatische stress disorder bij kinderen van 6 jr en jonger	4	11	0	0
1452	1	1	27	0	0	0	24	1	0	0	6	1	0	0	1	0	0	0	0	1	0	2	0	1	1	0	0	0	1	0	0	4	LTS	4	0	0	0	309.81				0	0	0	Ongespecificeerde angst disorder	9	9	0	0
1453	1	1	99	0	0	1	39	0	1	0	6	1	0	0	1	0	0	0	0	1	0	1	99	0	9	9	9	9	1	0	0		LTS	4	0	0	0	300.4	300.81	301.82	301.82	0	0	0	Dysthyme disorder	3	3	0	0
1454	1	1	24	0	0	0	30	1	0	0	6	1	0	0	1	0	0	0	0	1	0	2	0	1	1	0	0	0	1	0	0		MBO	4	1	0	0	312.9	296.3	301.81		0	0	0	disorder in de impulsbeheersing NAO	0	1	1	0
1455	2	1	99	0	0	1	39	0	1	0	6	1	0	0	1	0	0	0	0	1	0	99	99	0	9	9	9	9	9	99	99			99	99	99	99	314.9	312.3	799.9	0	0	0	0	ADHD	9	9	1	0
1457	2	1	99	0	0	0	32	1	0	0	6	1	0	0	1	0	0	0	0	1	0	1	99	0	9	9	9	9	1	0	0		Basisonderwijs	1	0	0	0	300.02	0	301.83	0	0	0	0	Borderline personality disorder	6	0	0	0
1458	2	1	99	0	0	0	27	1	0	0	6	1	0	0	1	0	0	0	0	1	0	99	99	0	9	9	9	9	9	99	99			99	99	99	99	296.89				0	0	0	Bipolaire II stoornnis	3	4	0	0
1459	2	1	19	0	0	2	60	0	0	1	6	1	0	0	1	0	0	0	0	1	0	2	1	1	0	1	0	0	1	0	0	4	LHNO	4	0	0	0	311		300.9		0	0	0	Depressieve disorder:eenmalige episode-Ongespecificeerd	3	3	0	0
1460	1	1	99	0	0	1	41	0	1	0	6	1	0	0	1	0	0	0	0	1	0	99	99	0	9	9	9	9	9	99	99			99	99	99	99	304.4	309.81	799.9	0	0	0	0	Posttraumatic stress- disorder	4	11	0	0
1461	1	1	99	0	0	0	35	1	0	0	6	1	0	0	1	0	0	0	0	1	0	2	99	0	9	9	9	9	0	0	0		MBO 3-4 jarig	7	0	0	0	299				0	0	0	Depressieve disorder: Recidive Medium	3	3	1	0
1462	1	1	25	0	0	1	55	0	1	0	6	1	0	0	1	0	0	0	0	1	0	2	0	1	1	0	0	0	0	0	0	5	WO	11	0	0	0	296.32	300.02	301.4	301.82	0	0	0	Depressieve disorder:recidiverende episode-matig	3	3	0	0
1463	2	1	27	0	0	0	26	1	0	0	6	1	0	0	1	0	0	0	0	1	0	6	0	1	1	0	0	0	0	0	0	6	VWO	9	0	0	0	296.89				0	0	0	Bipolaire-I- disorder: actuele of meest recente episode depressief-licht	3	4	0	0
1464	2	1	26	0	0	0	28	1	0	0	6	1	0	0	1	0	0	0	0	1	0	1	0	1	1	0	0	0	0	0	0	5	HAVO	8	0	0	0	300.01	300.4	301.82	301.83	0	0	0	Borderline personality disorder	6	0	0	0
1465	1	1	99	0	0	1	46	0	1	0	6	1	0	0	1	0	0	0	0	1	0	1	99	0	9	9	9	9	1	0	0		MBO	4	1	0	0	296.22				0	0	0	Ongespecificeerde Persoonlijkheids disorder	6	0	0	0
1466	2	1	26	0	0	1	37	0	1	0	6	1	0	0	1	0	0	0	0	1	0	2	0	1	1	0	0	0	1	0	0	4	MBO	4	1	0	0	300.3		301.82		0	0	0	Obsessieve- compulsieve disorder	4	2	0	0
1467	2	1	26	0	0	0	32	1	0	0	6	1	0	0	1	0	0	0	0	1	0	6	0	1	1	0	0	0	1	0	0		MBO	4	1	0	0	296.26	300			0	0	0	Posttraumatische stress disorder(incl. Posttraumatische stress disorder bij kinderen van 6 jr en jonger)	4	11	0	0
1468	2	1	99	0	0	0	27	1	0	0	6	1	0	0	1	0	0	0	0	1	0	99	99	0	9	9	9	9	9	99	99			7	99	99	99	300.29	300.01			0	0	0	Specifieke fobie	4	2	0	0
1469	2	1	99	0	0	1	44	0	1	0	6	1	0	0	1	0	0	0	0	1	0	3	99	0	9	9	9	9	0	0	0	5	HBO	10	0	0	0	296.44	300	799.9	0	0	0	0	Bipolaire I disorder: Laatste episode manisch, Ernstig met psychotische kenmerken	3	4	0	0
1470	2	1	18	0	0	0	29	1	0	0	6	1	0	0	1	0	0	0	0	1	0	6	1	1	0	1	0	0	1	0	0	4	MBO	4	1	0	0			301.82		0	0	0	Vermijdende persoonlijkheids disorder	6	0	0	1
1471	2	1	99	0	0	1	52	0	1	0	6	1	0	0	1	0	0	0	0	1	0	2	99	0	9	9	9	9	1	0	0	4	LHNO	4	0	0	0	296.32	307.51	301.82		0	0	0	Vermijdende persoonlijkheids disorder	6	0	0	0
1472	2	1	99	0	0	0	33	1	0	0	6	1	0	0	1	0	0	0	0	1	0	1	99	0	9	9	9	9	1	0	0	4	MBO	4	1	0	0	300				0	0	0	Borderline personality disorder	6	0	0	0
1473	2	1	21	0	0	1	36	0	1	0	6	1	0	0	1	0	0	0	0	1	0	1	0	1	1	0	0	0	0	0	0	5	HAVO	8	0	0	0	309.4				0	0	0	Genderdysforie bij adolescenten of volwassenen	9	1	0	0
1474	1	1	22	0	0	1	51	0	1	0	6	1	0	0	1	0	0	0	0	1	0	3	0	1	1	0	0	0	1	0	0	4	LTS	4	0	0	0	312.3	312.3	301.81	301.83	0	0	0	Narcistische persoonlijkheids disorder	6	0	0	0
1475	1	1	18	1	0	1	55	0	1	0	6	1	0	0	1	0	0	0	0	1	0	2	1	1	0	1	0	0	9	1	1	0		99	99	0	0	309.81	0	2271.09	0	0	0	0	Posttraumatische stress disorder(incl. Posttraumatische stress disorder bij kinderen van 6 jr en jonger	4	11	0	0
1476	1	1	99	0	0	0	29	1	0	0	6	1	0	0	1	0	0	0	0	1	0	3	99	0	9	9	9	9	1	0	0	4	VMBO	4	1	0	0	296.31	2262.82	301.83	0	0	0	0	Borderline personality disorder	6	0	0	0
1477	1	1	23	0	0	2	60	0	0	1	6	1	0	0	1	0	0	0	0	1	0	2	0	1	1	0	0	0	0	0	0	6	WO	11	0	0	0	309.81	296.32			0	0	0	Posttraumatische stress disorder(incl. Posttraumatische stress disorder bij kinderen van 6 jr en jonger	4	11	0	0
1478	1	1	17	0	0	1	36	0	1	0	6	1	0	0	1	0	0	0	0	1	0	1	1	1	0	1	0	0	1	0	0	4	MBO	4	1	2	0	309.81	2262.2	301.82		0	0	0	Vermijdende persoonlijkheids disorder	6	0	0	0
1479	2	1	99	0	0	1	53	0	1	0	6	1	0	0	1	0	0	0	0	1	0	99	99	0	9	9	9	9	9	99	99			99	99	99	99	299.8	296.36	2271.09	0	0	0	0	PDD NOS	9	9	1	0
1480	2	1	99	0	0	1	42	0	1	0	6	1	0	0	1	0	0	0	0	1	0	2	99	0	9	9	9	9	1	0	1	1	Basisonderwijs	1	0	0	0	300.01		301.82		0	0	0	Vermijdende persoonlijkheids disorder	6	0	0	0
1481	1	1	99	0	0	0	30	1	0	0	6	1	0	0	1	0	0	0	0	1	0	1	99	0	9	9	9	9	1	0	0		MAVO	4	1	0	0	296.32	305.2	301.82		0	0	0	Vermijdende persoonlijkheids disorder	6	0	0	0
1482	2	1	99	0	0	1	40	0	1	0	6	1	0	0	1	0	0	0	0	1	0	3	99	0	9	9	9	9	1	0	0		KMBO	4	0	0	0	296.36	0	301.83	301.6	0	0	0	Borderline personality disorder	6	0	0	0
1483	2	1	10	0	0	0	33	1	0	0	6	1	0	0	1	0	0	0	0	1	0	6	1	1	0	0	1	1	1	0	0	0	ZMOK	2	0	0	0	300				0	0	0	Andere gespecificeerde angst disorder	4	2	0	0
1484	2	1	99	0	0	0	31	1	0	0	6	1	0	0	1	0	0	0	0	1	0	6	99	0	9	9	9	9	0	0	0		WO	11	0	0	0	296.33	300.01	301.82		0	0	0	Depressieve disorder:recidiverende episode-ernstig	3	3	0	0
1486	1	1	99	0	0	1	55	0	1	0	6	1	0	0	1	0	0	0	0	1	0	99	99	0	9	9	9	9	9	99	99			99	99	99	99	296.3	309.81	2271.09	0	0	0	0	Posttraumatic stress- disorder: Chroni	4	11	0	0
1487	2	1	99	0	0	0	27	1	0	0	6	1	0	0	1	0	0	0	0	1	0	6	99	0	9	9	9	9	1	0	0	5	VMBO	4	1	0	0	300	0	301.83	0	0	0	0	Borderline personality disorder	6	0	0	0
1488	2	1	99	0	0	0	30	1	0	0	6	1	0	0	1	0	0	0	0	1	0	2	99	0	9	9	9	9	1	0	0	4	MBO	4	1	0	0	296.22				0	0	0	Depressieve disorder:eenmalige episode-matig	3	3	0	0
1489	2	1	99	0	0	0	26	1	0	0	6	1	0	0	1	0	0	0	0	1	0	1	99	0	9	9	9	9	1	0	0	4	VMBO	4	1	0	0	305.2	305.7	301.9		0	0	0	Ongespecificeerde persoonlijkheids disorder	6	0	0	0
1490	1	1	16	0	0	1	53	0	1	0	6	1	0	0	1	0	0	0	0	1	0	2	1	1	0	1	0	0	1	0	0		LBO	4	0	0	0	299				0	0	0	Autismespectrum disorder	9	9	1	0
1491	1	1	24	0	0	0	35	1	0	0	6	1	0	0	1	0	0	0	0	1	0	1	0	1	1	0	0	0	0	0	0	6	HAVO	8	0	0	0	296.22				0	0	0	Autismespectrum disorder	9	9	0	0
1492	2	1	99	0	0	1	38	0	1	0	6	1	0	0	1	0	0	0	0	1	0	99	99	0	9	9	9	9	9	99	99			99	99	99	99	299	2261.1	799.9	0	0	0	0	Posttraumatic stress- disorder: Chroni	4	11	1	0
1493	2	1	99	0	0	0	31	1	0	0	6	1	0	0	1	0	0	0	0	1	0	99	99	0	9	9	9	9	9	99	99			99	99	99	99	296.22	2261.1			0	0	0	Depressieve st. eenm.epi. matig	3	3	0	0
1494	1	1	23	0	0	0	26	1	0	0	6	1	0	0	1	0	0	0	0	1	0	1	0	1	1	0	0	0	1	0	0	4	MBO	4	1	0	0	300.21	0	301.82	0	0	0	0	Vermijdende persoonlijkheids disorder	6	0	0	0
1495	2	1	99	0	0	1	41	0	1	0	6	1	0	0	1	0	0	0	0	1	0	6	99	0	9	9	9	9	0	0	0	5	HBO	10	0	0	0	299	314.01	301.4	0	0	0	0	Autistische disorder	9	9	1	0
1496	1	1	19	0	0	0	33	1	0	0	6	1	2	0	1	0	0	0	0	1	0	2	1	1	0	1	0	0	1	0	0		VBO/mavo	5	1	0	0	296.22	311	301.9		0	0	0	Depressieve disorder: Eenmalige episode, Matig	3	3	0	0
1497	1	1	23	0	0	1	53	0	1	0	6	1	0	0	1	0	0	0	0	1	0	2	0	1	1	0	0	0	0	0	0	7	HBO	10	0	0	0	2261.1	2261.1	301.9	301.82	0	0	0	Ongespecificeerde Persoonlijkheids disorder	6	0	0	1
1498	1	1	20	0	0	1	46	0	1	0	6	1	0	0	1	0	0	0	0	1	0	2	0	1	1	0	0	0	1	0	0		MBO	4	1	0	0	296.89	2262.82	799.9	0	0	0	0	Bipolaire II disorder: Depressief	3	4	0	0
1499	2	1	7	1	0	1	41	0	1	0	6	1	0	0	1	0	0	0	0	1	0	2	1	1	0	0	1	1	1	1	1	0	Geen	0	0	99	99	309.81		301.9		0	0	0	Posttraumatische stress disorder (incl. de posttraumatische stress disorder bij kinderen van 6 jaar en jonger)	4	11	0	0
1500	2	1	20	0	0	1	48	0	1	0	6	1	0	0	1	0	0	0	0	1	0	3	0	1	1	0	0	0	1	0	0	2	MBO	4	1	0	0								Borderline personality disorder	6	0	0	1
1501	2	1	14	0	0	0	34	1	0	0	6	1	0	0	1	0	0	0	0	1	0	1	1	1	0	0	1	1	1	0	1	0	Basisonderwijs	1	0	0	0	309.81			301.9	0	0	0	Depressieve disorder:recidiverend-matig	3	3	0	0
1502	1	1	19	0	0	0	29	1	0	0	6	1	0	0	1	0	0	0	0	1	0	1	1	1	0	1	0	0	1	0	0	2	Basisonderwijs	1	0	0	0								Gedrags disorder:niet gespecificeerd begin	0	1	0	1
1503	1	1	23	0	0	0	32	1	0	0	6	1	0	0	1	0	0	0	0	1	0	1	0	1	1	0	0	0	1	0	0	4	Basisonderwijs	1	0	0	0	300.4	299	2271.09	0	0	0	0	Autismespectrum disorder	9	9	1	0
1504	1	1	24	0	0	0	25	1	0	0	6	1	0	0	1	0	0	0	0	1	0	1	0	1	1	0	0	0	1	0	0		Basisonderwijs	1	0	0	0	314.01	296.31			0	0	0	Aandachtsdeficiëntie-/hyperactiviteits disorder:gecombineerd beeld	9	9	1	0
1505	1	1	28	0	0	1	36	0	1	0	6	1	0	0	1	0	0	0	0	1	0	1	0	1	1	0	0	0	0	0	0	6	WO	11	0	0	0	300.9				0	0	0	Ongespecificeerde psychische disorder	0	1	0	0
1506	1	1	22	1	0	0	25	1	0	0	6	1	0	0	1	0	0	0	0	1	0	1	0	1	1	0	0	0	1	1	0	4	VMBO	4	1	0	0	300.23	313.82	301.82	0	0	0	0	Sociale fobie:gegeneraliseerd	4	2	0	0
1507	1	1	23	0	0	0	26	1	0	0	6	1	0	0	1	0	0	0	0	1	0	1	0	1	1	0	0	0	1	1	1	6	Basisonderwijs België	1	0	0	0								Posttraumatische stress disorder	4	11	0	1
1508	1	1	23	0	0	1	50	0	1	0	6	1	2	0	1	0	0	0	0	1	0	6	0	1	1	0	0	0	1	0	0	4	MAVO	5	1	0	0	296.33	0	2271.09	0	0	0	0	Depressieve disorder:recidiverend, ernstig zonder psychotische kenmerken	3	3	0	0
1509	2	1	18	0	0	1	37	0	1	0	6	1	0	0	1	0	0	0	0	1	0	6	1	1	0	1	0	0	1	0	0	4	MBO	4	1	0	0			301.9		0	0	0	Ongespecificeerde Persoonlijkheids disorder	6	0	0	1
1510	1	1	17	0	0	0	31	1	0	0	6	1	0	0	1	0	0	0	0	1	0	2	1	1	0	1	0	0	0	0	0	4	MBO4	7	0	0	0	300	296.31			0	0	0	Anxiety disorder NAO	4	2	0	0
1511	1	1	13	0	0	1	40	0	1	0	6	1	0	0	1	0	0	0	0	1	0	1	1	1	0	0	1	1	1	0	0	5	LTS	4	0	0	0	309.81	305.7	301.7		0	0	0	Posttraumatische stres disorder(incl. Posttraumatische stres disorder bij kinderen van 6 jr en jonger)	4	11	0	0
1512	2	1	22	0	0	0	24	1	0	0	6	1	0	0	1	0	0	0	0	1	0	1	0	1	1	0	0	0	1	0	0	4	VMBO kader	4	0	0	0	309.81				0	0	0	Posttraumatische stress disorder (incl. de posttraumatische stress disorder bij kinderen van 6 jaar en jonger)	4	11	0	0
1513	1	1	14	1	0	0	31	1	0	0	6	1	0	0	1	0	0	0	0	1	0	1	1	1	0	0	1	1	1	0	0	4	MBO	4	1	0	0	298.9	309.81	799.9	0	0	0	0	Posttraumatische stress disorder (incl. de posttraumatische stress disorder bij kinderen van 6 jaar en jonger)	4	11	0	0
1514	2	1	23	0	0	0	35	1	0	0	6	1	0	0	1	0	0	0	0	1	0	2	0	1	1	0	0	0	0	0	0	7	MBO3	7	0	0	0	312.9				0	0	0	Andere gespecificeerde disruptieve, impulsbeheersings-of andere gedrags disorder	4	2	1	0
1515	1	1	24	0	0	1	47	0	1	0	6	1	0	0	1	0	0	0	0	1	0	2	0	1	1	0	0	0	0	0	0	4	HTS	10	0	0	0	316	311	301.9		0	0	0	Ongespecificeerde depressieve stemmings disorder	9	9	0	0
1516	1	1	16	0	0	1	37	0	1	0	6	1	0	0	1	0	0	0	0	1	0	6	1	1	0	1	0	0	1	0	0	2	VMBO BBL2	4	0	0	0	311	312.34			0	0	0	Aanpassings disordersen-ongespecificeerd	4	2	0	0
1517	2	1	25	0	0	1	54	0	1	0	6	1	0	0	1	0	0	0	0	1	0	2	0	1	1	0	0	0	1	0	0	4	LHNO	4	0	0	0								Gegeneraliseerde-angst disorder	4	2	0	1
1518	1	1	26	0	0	1	52	0	1	0	6	1	0	0	1	0	0	0	0	1	0	1	0	1	1	0	0	0	0	0	0	7	HTS	10	0	0	0	300.82				0	0	0	Ongespecificeerde somatisch-symptoom disorder of verwante disorder	2	5	0	0
1519	1	1	25	0	0	1	44	0	1	0	6	1	0	0	1	0	0	0	0	1	0	1	0	1	1	0	0	0	1	0	0	4	LTS	4	0	0	0	300.23	311			0	0	0	Sociale angst disorder (sociale fobie)	4	2	0	0
1520	1	1	16	0	0	1	41	0	1	0	6	1	0	0	1	0	0	0	0	1	0	2	1	1	0	1	0	0	1	0	0	1	Lager Onderwijs	1	0	0	0								Niet aanwezig	0	0	0	1
1521	2	1	21	0	0	0	31	1	0	0	6	1	0	0	1	0	0	0	0	1	0	6	0	1	1	0	0	0	1	0	0	5	VMBO BBL2	4	0	0	0								Niet aanwezig	0	0	0	1
1522	1	1	18	0	0	0	29	1	0	0	6	1	0	0	1	0	0	0	0	1	0	6	1	1	0	1	0	0	1	0	0	4	MBO nivo 2	4	0	0	0								Acute stress- disorder	4	2	0	1
1523	1	1	12	0	0	2	63	0	0	1	6	1	0	0	1	0	0	0	0	1	0	2	1	1	0	0	1	1	1	0	0	3	LTS	4	0	0	0								Persiserende depressieve disorder (dysthemie)	3	3	0	1
1524	1	1	25	0	0	0	24	1	0	0	6	1	0	0	1	0	0	0	0	1	0	1	0	1	1	0	0	0	1	0	0	4	VMBO-kader	4	0	0	0								Ongspecificeerde depressieve-stemmings disorder	2	5	0	1
1525	1	1	23	0	0	1	49	0	1	0	6	1	0	0	1	0	0	0	0	1	0	2	0	1	1	0	0	0	0	0	0	6	HTS	10	0	0	0								Depressieve disorder: eenmalige episode-ongespecificeerd	3	3	0	1
1526	2	1	21	0	0	0	30	1	0	0	6	1	0	0	1	0	0	0	0	1	0	2	0	1	1	0	0	0	0	0	0	6	Universiteit	11	0	0	0	300.81	300.11		301.4	0	0	0	Somatische-symptoom disorder	4	2	0	0
1527	2	1	18	0	0	1	40	0	1	0	6	1	0	0	1	0	0	0	0	1	0	2	1	1	0	1	0	0	1	0	0	5	MBO	4	1	0	0	309.81			301.83	0	0	0	Posttraumatische stress disorder (incl. de posttraumatische stress disorder bij kinderen van 6 jaar of jonger)	4	11	0	0
1528	2	1	12	0	0	1	43	0	1	0	6	1	0	0	1	0	0	0	0	1	0	3	1	1	0	0	1	1	1	0	0	4	Praktijkschool	4	1	0	0								Depressieve disorder:recidiverende episode-gedeeltelijk in remissie	3	3	0	1
1529	2	1	20	0	0	0	22	1	0	0	6	1	0	0	1	0	0	0	0	1	0	6	0	1	1	0	0	0	1	0	0	4	MBO-2	4	0	0	0	309.81	314.9			0	0	0	Posttraumatische stress disorder (incl. de posttraumatische stress disorder bij kinderen van 6 jaar of jonger)	4	11	1	0
1530	1	1	26	0	0	0	26	1	0	0	6	1	0	0	1	0	0	0	0	1	0	1	0	1	1	0	0	0	0	0	0	6	HAVO	8	0	0	0								Aandachtsdeficiëntie-/hyperacrtiviteits disorder:overwegend onoplettend beeld	9	9	1	1
1531	2	1	13	0	0	1	58	0	1	0	6	1	0	0	1	0	0	0	0	1	0	3	1	1	0	0	1	1	1	0	0	3	Lager Onderwijs	1	0	0	0	296.21	300			0	0	0	Depressieve disorder: eenmalige episode-licht	3	3	0	0
1532	2	1	21	0	0	0	28	1	0	0	6	1	0	0	1	0	0	0	0	1	0	1	0	1	1	0	0	0	0	0	0	4	MBO nivo 4	7	0	0	0								Posttraumatische stress disorder (incl. de posttraumatische stress disorder bij kinderen van 6 jaar of jonger)	4	11	0	1
1533	1	1	26	0	0	0	34	1	0	0	6	1	0	0	1	0	0	0	0	1	0	1	0	1	1	0	0	0	0	0	0	5	HBO+	10	0	0	0	300.3				0	0	0	Obsessieve-compulsieve disorder	4	2	0	0
1534	1	1	24	0	0	1	57	0	1	0	6	1	0	0	1	0	0	0	0	1	0	2	0	1	1	0	0	0	0	0	0	7	HBO	10	0	0	0	300.01	300.22			0	0	0	Paniek disorder	4	2	0	0
1535	1	1	19	0	0	2	65	0	0	1	6	1	0	0	1	0	0	0	0	1	0	2	1	1	0	1	0	0	0	0	0	4	MAVO	6	0	0	0	300.02				0	0	0	Gegeneraliseerde-angst disorder	4	2	0	0
1536	2	1	17	1	0	1	40	0	1	0	6	1	0	0	1	0	0	0	0	1	0	1	1	1	0	1	0	0	1	0	0		Lager Onderwijs	1	0	0	0								Andere gespecificeerde obsessieve-compulsieve of verwane disorder	6	0	0	1
1537	1	1	21	1	0	1	44	0	1	0	6	1	0	0	1	0	0	0	0	1	0	2	0	1	1	0	0	0	0	0	0	4	MMO	7	0	0	0	296.32	303.9		301.82	0	0	0	Depressieve disorder:recidiverende episode-matig	3	3	0	0
1538	1	1	25	0	0	1	44	0	1	0	6	1	0	0	1	0	0	0	0	1	0	1	0	1	1	0	0	0	1	0	1	0	Praktijkopl. Slachterij	4	0	0	0	300.82	300	799.9	0	0	0	0	Ongespecificeerde angst disorder	9	9	0	0
1539	2	1	26	0	0	0	29	1	0	0	6	1	0	0	1	0	0	0	0	1	0	2	0	1	1	0	0	0	1	0	0	4	MBO	4	0	0	0	311				0	0	0	Ongespecificeerde depressieve stemmings disorder	9	9	0	0
1540	1	1	25	0	0	1	46	0	1	0	6	1	0	0	1	0	0	0	0	1	0	1	0	1	1	0	0	0	1	0	0	4	LTS	4	0	0	0								Autismespectrum disorder	9	9	0	1
1541	1	1	17	0	0	1	38	0	1	0	6	1	0	0	1	0	0	0	0	1	0	1	1	1	0	1	0	0	1	0	0	4	Geen	0	0	0	0	314.01			301.83	0	0	0	Aandachtsdeficiëntie-/hyperacrtiviteits disorder:gecombineerd beeld	9	9	1	0
1542	2	1	22	1	0	2	61	0	0	1	6	1	0	0	1	0	0	0	0	1	0	2	0	1	1	0	0	0	1	1	1	4	LBO/MBO	4	0	0	0	297.1	311			0	0	0	Waan disorder: jaloerse type	2	6	0	0
1543	1	1	28	0	0	0	25	1	0	0	6	1	0	0	1	0	0	0	0	1	0	1	0	1	1	0	0	0	0	0	0	6	Universiteit	11	0	0	0	299				0	0	0	Autismespectrum disorder	9	9	1	0
1544	2	1	25	0	0	1	46	0	1	0	6	1	0	0	1	0	0	0	0	1	0	2	0	1	1	0	0	0	1	0	0	4	MBO Kappersopleiding	4	1	0	0			301.9		0	0	0	Ongespecificeerde persoonlijkheids disorder	6	0	0	1
1545	1	1	22	0	0	1	44	0	1	0	6	1	0	0	1	0	0	0	0	1	0	1	0	1	1	0	0	0	1	0	0	4	MBO	4	1	0	0	309.81	296.32			0	0	0	Posttraumatische stress disorder (incl. de posttraumatische stress disorder bij kinderen van 6 jaar of jonger)	4	11	0	0
1546	1	1	12	0	0	1	37	0	1	0	6	1	0	0	1	0	0	0	0	1	0	1	1	1	0	0	1	1	1	0	0	4	I-VMBO	4	1	0	0	314.01				0	0	0	Aandachtsdeficiëntie-/hyperactiviteits disorder: gecombineerd beeld	9	9	1	0
1547	2	1	26	0	0	1	47	0	1	0	6	1	0	0	1	0	0	0	0	1	0	2	0	1	1	0	0	0	0	0	0	7.5	VWO	9	0	0	0	309.81	303.9			0	0	0	Posttraumatische stress disorder (incl. de posttraumatische stress disorder bij kinderen van 6 jaar of jonger)	4	11	0	0
1548	2	1	26	0	0	0	28	1	0	0	6	1	0	0	1	0	0	0	0	1	0	1	0	1	1	0	0	0	0	0	1	6	Universiteit	11	0	0	0								Depressieve disorder: recidiverende episode-matig	3	3	0	1
1549	1	1	99	0	0	0	33	1	0	0	6	1	0	0	1	0	0	0	0	1	0	1	99	0	9	9	9	9	1	0	0	3	MBO Metaal	4	10	0	0	296.32				0	0	0	Depressieve disorder:recidiverende episode-matig	3	3	0	0
1550	1	1	20	0	0	0	29	1	0	0	6	1	0	0	1	0	0	0	0	1	0	2	0	1	1	0	0	0	1	0	0	3	LBO/MBO	4	0	0	0	300.3	305.7	799.9	0	0	0	0	Obsessieve-compulsieve disorder	4	2	0	0
1551	2	1	27	0	0	0	35	1	0	0	6	1	0	0	1	0	0	0	0	1	0	3	0	1	1	0	0	0	0	0	0	4	MBO nivo4	7	0	0	0	299	296.31	2271.09	0	0	0	0	Autismespectrum disorder	9	9	1	0
1552	2	1	99	1	0	1	56	0	1	0	6	1	0	0	1	0	0	0	0	1	0	2	99	0	9	9	9	9	1	1	0	1	Lager Onderwijs	1	0	1	1	296.24	309.81			0	0	0	Depressieve disorder:eenmalige episode-Met psychotische kenmerken	3	3	0	0
1553	2	1	13	1	0	0	26	1	0	0	6	1	0	0	1	0	0	0	0	1	0	1	1	1	0	0	1	1	1	1	1	0	MBO in Polen	4	1	99	99	309.81				0	0	0	Posttraumatische stress disorder (incl. de posttraumatische stress disorder bij kinderen van 6 jaar of jonger)	4	11	0	0
1554	1	1	21	0	0	1	41	0	1	0	6	1	0	0	1	0	0	0	0	1	0	1	0	1	1	0	0	0	0	0	0	5	HBO	10	0	0	0	314.01	300.9	799.9	0	0	0	0	Aandachtsdeficiëntie-/hyperactiviteits disorder: gecombineerd beeld	9	9	1	0
1555	2	1	21	0	0	1	47	0	1	0	6	1	0	0	1	0	0	0	0	1	0	2	0	1	1	0	0	0	0	0	0	4	MBO-3	7	0	2	0	300.4				0	0	0	Persisiterende depressieve disorder(dysthymie): laat begin	3	3	0	0
1556	2	1	99	0	0	1	45	0	1	0	6	1	0	0	1	0	0	0	0	1	0	2	99	0	9	9	9	9	1	0	1	0	Lager Onderwijs	1	0	0	0								Depressieve disorder:recidiverende episode-gedeeltelijk in remissie	3	3	0	1
1557	2	1	99	0	0	1	51	0	1	0	6	1	0	0	1	0	0	0	0	1	0	3	99	0	9	9	9	9	0	0	0	6	HAVO	8	0	0	0								Vermijdende persoonlijkheids disorder	6	0	0	1
1558	2	1	99	0	0	0	33	1	0	0	6	1	0	0	1	0	0	0	0	1	0	1	99	0	9	9	9	9	1	0	0	4	VMBO	4	1	0	0								Aandachtsdeficiëntie-/hyperactiviteits disorder: overwegend onoplettend beeld	9	9	1	1
1559	1	1	99	0	0	1	40	0	1	0	6	1	0	0	1	0	0	0	0	1	0	1	99	0	9	9	9	9	1	0	0		MBO	4	1	0	0	296.23				0	0	0	Depressieve disorder: eenmalige episode-ernstig	3	3	0	0
1560	1	1	99	0	0	1	48	0	1	0	6	1	0	0	1	0	0	0	0	1	0	3	99	0	9	9	9	9	0	0	0		HBO	10	0	0	0								Niet aanwezig	0	0	0	1
1561	2	1	99	0	0	1	37	0	1	0	6	1	0	0	1	0	0	0	0	1	0	2	99	0	9	9	9	9	1	0	0	4	VBO	4	0	0	0	314.01	0	2271.09	0	0	0	0	Aandachtsdeficiëntie-/hyperactiviteits disorder:gecombineerd beeld-gedeeltelijk in remissie	9	9	1	0
1562	2	1	99	0	0	0	26	1	0	0	6	1	0	0	1	0	0	0	0	1	0	1	99	0	9	9	9	9	0	0	0	5	HBO	10	0	0	0	293.84	0	799.9	0	0	0	0	Depressieve disorder:eenmalige episode-ernstig	3	3	0	0
1563	2	1	99	0	0	1	38	0	1	0	6	1	0	0	1	0	0	0	0	1	0	2	99	0	9	9	9	9	1	0	0	4	MULO/MAVO	5	1	0	0								Depressieve disorder:recidiverende episode-ongespecificeerd	3	3	0	1
1564	1	1	99	0	0	1	54	0	1	0	6	1	2	0	1	0	0	0	0	1	0	3	99	0	9	9	9	9	1	0	0	4	LTS	4	0	0	0	296.33	307.45	2271.09	0	0	0	0	Borderline personality disorder	6	0	0	0
1565	1	1	16	0	0	1	51	0	1	0	6	1	0	0	1	0	0	0	0	1	0	1	1	1	0	1	0	0	1	0	0	4	LTS	4	0	0	0								Niet aanwezig	0	0	0	1
1566	1	1	17	0	0	0	24	1	0	0	6	1	0	0	1	0	0	0	0	1	0	1	1	1	0	1	0	0	1	0	0	4	MBO	4	1	2	0								Niet aanwezig	0	0	0	1
1567	1	1	23	0	0	1	41	0	1	0	6	1	0	0	1	0	0	0	0	1	0	1	0	1	1	0	0	0	1	0	0	3	MBO	4	1	0	0	300.9	311			0	0	0	Ongespecificeerde psychische disorder	0	1	0	0
1568	1	1	13	0	0	0	35	1	0	0	6	1	0	0	1	0	0	0	0	1	0	6	1	1	0	0	1	1	1	0	1	0	Basisonderwijs	1	0	0	0								Gedrags disorder	4	10	0	1
1569	2	1	23	0	0	1	41	0	1	0	6	1	0	0	1	0	0	0	0	1	0	3	0	1	1	0	0	0	1	0	0	4	LBO	4	0	0	0								Aandachtsdeficiëntie-/hyperactiviteits disorder:gecombineerd beeld	9	9	1	1
1570	1	1	19	0	0	1	56	0	1	0	6	1	0	0	1	0	0	0	0	1	0	1	1	1	0	1	0	0	1	0	0	4	LTS	4	0	0	0	300.4	2262.2			0	0	0	Depressieve disorder: Recidiverend, niet-gespecificeerd	3	3	0	0
1571	2	1	21	0	0	1	47	0	1	0	6	1	0	0	1	0	0	0	0	1	0	1	0	1	1	0	0	0	1	1	1	0	1 jarige beroepsopleiding ICT	4	1	0	0								Niet aanwezig	0	0	0	1
1572	2	1	22	0	0	0	35	1	0	0	6	1	0	0	1	0	0	0	0	1	0	2	0	1	1	0	0	0	0	0	0	4	MBO nivo 4	7	0	0	0	296.32	300.23			0	0	0	Depressieve disorder:recidiverende episode-matig	3	3	0	0
1573	1	1	20	0	0	0	33	1	0	0	6	1	0	0	1	0	0	0	0	1	0	6	0	1	1	0	0	0	1	0	0	4	MBO nivo2 Beveiliging	4	0	0	0								Aandachtsdeficiëntie-/hyperactiviteits disorder:gecombineerd beeld	9	9	1	1
1574	1	1	19	1	0	0	33	1	0	0	6	1	0	0	1	0	0	0	0	1	0	1	1	1	0	1	0	0	1	0	0	4	Basisonderwijs	1	0	0	0								Aandachtstekort disorder met hyperactiviteit: Gecombineerd type	9	9	1	1
1575	2	1	22	0	0	1	53	0	1	0	6	1	0	0	1	0	0	0	0	1	0	1	0	1	1	0	0	0	1	0	0	5	LHNO	4	0	0	0	300.4	2262.81			0	0	0	Posttraumatische stress disorder (incl. de posttraumatische stress disorder bij kinderen van 6 jaar en jonger)	4	11	0	0
1576	1	1	27	0	0	0	24	1	0	0	6	1	0	0	1	0	0	0	0	1	0	1	0	1	1	0	0	0	1	0	0	4	Vmbo, nog bezig met MBO	4	1	0	0	299.8	0	799.9	0	0	0	0	Asperger	9	9	1	0
1577	2	1	22	0	0	1	42	0	1	0	6	1	0	0	1	0	0	0	0	1	0	1	0	1	1	0	0	0	0	0	0	4	MBO verzorging	7	0	0	0								Gegeneraliseerde-angst disorder	4	2	0	1
1578	1	1	99	0	0	1	55	0	1	0	6	1	0	0	1	0	0	0	0	1	0	99	99	0	9	9	9	9	0	0	0	4	MBO-verpleegkunde	7	0	0	0								Somatische-symptoomstooris	4	2	0	1
1579	1	1	12	0	0	0	27	1	0	0	6	1	0	0	1	0	0	0	0	1	0	1	1	1	0	0	1	1	1	0	0		MBO nivo 2	4	0	0	0								Aandachtsdeficiëntie-/hyperactiviteits disorder:gecombineerd beeld	9	9	1	1
1580	2	1	20	0	0	1	37	0	1	0	6	1	0	0	1	0	0	0	0	1	0	1	0	1	1	0	0	0	0	0	0	6	HAVO	8	0	0	0	296.36				0	0	0	Depressieve disorder:recidiverende episode-gedeeltelijk in remissie	3	3	0	0
1581	2	1	18	0	0	0	34	1	0	0	6	1	0	0	1	0	0	0	0	1	0	2	1	1	0	1	0	0	1	0	0	4	VMBO	4	1	0	0								Persisterende depressieve disorder(dysthymie):laat begin	3	3	0	1
1582	1	1	25	0	0	0	27	1	0	0	6	1	0	0	1	0	0	0	0	1	0	1	0	1	1	0	0	0	1	0	0	4	VMBO	4	1	0	0								Periodieke explosieve disorder	9	9	0	1
1583	2	1	20	0	0	0	29	1	0	0	6	1	0	0	1	0	0	0	0	1	0	1	0	1	1	0	0	0	1	0	0	4	VMBO	4	1	0	0								Vermijdende persoonlijkheids disorder	6	0	0	1
1584	2	1	99	0	0	1	46	0	1	0	6	1	0	0	1	0	0	0	0	1	0	6	99	0	9	9	9	9	9	2	2			99	99	99	99								Persisterende depressieve disorder (dysthymie): vroeg begin	3	3	0	1
1585	2	1	20	0	0	1	50	0	1	0	6	1	0	0	1	0	0	0	0	1	0	1	0	1	1	0	0	0	1	0	0	4	LBO	4	0	0	0	300.4	307.5	799.9	0	0	0	0	Persisterende depressieve disorder (dysthymie): vroeg begin	3	3	0	0
1586	2	1	21	0	0	1	53	0	1	0	6	1	0	0	1	0	0	0	0	1	0	6	0	1	1	0	0	0	1	0	0	4	LMO	2	10	0	0	300.3	0	301.4	0	0	0	0	Obsessieve-compulsieve disorder	4	2	0	0
1587	2	1	28	0	0	1	55	0	1	0	6	1	0	0	1	0	0	0	0	1	0	2	0	1	1	0	0	0	0	0	0	6	HAVO	8	0	0	0	296.23	300.02			0	0	0	Depressieve disorder:eenmalige episode-ernstig	3	3	0	0
1588	2	1	15	0	0	0	29	1	0	0	6	1	0	0	1	0	0	0	0	1	0	1	1	1	0	0	1	1	1	0	0	3	Lager Onderwijs	1	0	0	0	300.01	309.81	799.9	0	0	0	0	Ziekteangst disorder	7	0	0	0
1589	2	1	22	0	0	1	45	0	1	0	6	1	0	0	1	0	0	0	0	1	0	2	0	1	1	0	0	0	0	0	0	4	MBO-4 verpleegkunde	7	0	0	0	307.5	300			0	0	0	Sociale angst disorder (sociale fobie)	4	2	0	0
1590	1	1	20	0	0	0	30	1	0	0	6	1	0	0	1	0	0	0	0	1	0	1	0	1	1	0	0	0	1	0	0	4	VMBO	4	1	0	0								Autismespectrum disorder	9	9	0	1
1591	1	1	22	0	0	1	44	0	1	0	6	1	0	0	1	0	0	0	0	1	0	2	0	1	1	0	0	0	0	0	0	5	MBO-3 tuinbouw	7	0	0	0								Ongespecificeerde psychische disorder	0	1	0	1
1592	2	1	22	0	0	1	57	0	1	0	6	1	0	0	1	0	0	0	0	1	0	2	0	1	1	0	0	0	1	0	0	4	LHNO	4	0	0	0								Sociale angst disorder (sociale fobie)	4	2	0	1
1593	2	1	10	0	0	1	42	0	1	0	6	1	0	0	1	0	0	0	0	1	0	2	1	1	0	0	1	1	1	0	0	4	Basisschool	1	0	0	0			319		0	0	0	Ongespecificeerde verstandelijke beperking (verstandelijke ontwikkelings disorder)	2	5	0	1
1594	1	1	17	0	0	1	55	0	1	0	6	1	0	0	1	0	0	0	0	1	0	3	1	1	0	1	0	0	1	0	0		MBO	4	1	0	0								Persisterende depressieve disorder (dysthymie): vroeg begin	3	3	0	1
1595	1	1	99	1	0	0	35	1	0	0	6	1	0	0	1	0	0	0	0	1	0	99	99	0	9	9	9	9	9	2	2			99	99	99	99								Paniek disorder	4	2	0	1
1596	2	1	19	0	0	0	32	1	0	0	6	1	0	0	1	0	0	0	0	1	0	1	1	1	0	1	0	0	1	0	0	4	VBO	4	1	0	0								Depressieve disorder:eenmalige episode-gedeeltelijke in remissie	3	3	0	1
1597	2	1	19	0	0	0	26	1	0	0	6	1	0	0	1	0	0	0	0	1	0	1	1	1	0	1	0	0	1	0	0	4	MBO-nivo 2	4	0	0	0	296.32	303.9			0	0	0	Depressieve disorder:recidiverende episode-matig	3	3	0	0
1598	2	1	23	0	0	0	30	1	0	0	6	1	0	0	1	0	0	0	0	1	0	1	0	1	1	0	0	0	0	0	0	5	MBO-3	7	0	0	0								Aandachtsdeficiëntie-/hyperactiviteits disorder: overwegend onoplettend beeld	9	9	1	1
1599	1	1	22	0	0	0	23	1	0	0	6	1	0	0	1	0	0	0	0	1	0	1	0	1	1	0	0	0	0	0	0	4	MBO-3	7	0	0	0			301.9		0	0	0	Persoonlijkheids disorder NAO	6	0	0	1
1600	2	1	21	0	0	1	44	0	1	0	6	1	0	0	1	0	0	0	0	1	0	6	0	1	1	0	0	0	1	0	0	5	LHNO	4	0	0	0	300.02	293.83			0	0	0	Gegeneraliseerde-angst disorder	4	2	0	0
1601	1	1	28	0	0	0	29	1	0	0	6	1	0	0	1	0	0	0	0	1	0	1	0	1	1	0	0	0	0	0	0	5	HAVO	8	0	0	0								Vermijdende persoonlijkheids disorder	6	0	0	1
1602	1	1	22	0	0	2	62	0	0	1	6	1	0	0	1	0	0	0	0	1	0	2	0	1	1	0	0	0	0	0	0	6	A-vpk. (nu HBO nivo)	10	0	0	0								Autismespectrum disorder	9	9	0	1
1603	1	1	20	0	0	0	26	1	0	0	6	1	0	0	1	0	0	0	0	1	0	1	0	1	1	0	0	0	1	0	0	4	BBL nivo 3	4	0	0	0	309.4		2262.89		0	0	0	Aanpassings disordersen-met een gemengde disorder van emoties en gedrag	4	2	0	0
1604	1	1	16	0	0	1	54	0	1	0	6	1	0	0	1	0	0	0	0	1	0	6	1	1	0	1	0	0	1	0	0	4	Kort MBO metaal	4	1	2	2								Niet aanwezig	0	0	0	1
1605	2	1	25	0	0	1	37	0	1	0	6	1	0	0	1	0	0	0	0	1	0	3	0	1	1	0	0	0	0	0	0	4	MEAO/MBA	7	0	0	0								Ongespecificeerde persoonlijkheids disorder	6	0	0	1
1606	1	1	24	1	0	1	48	0	1	0	6	1	0	0	1	0	0	0	0	1	0	3	0	1	1	0	0	0	1	0	0	4	Basisschool	1	0	0	0								Niet aanwezig	0	0	0	1
1607	2	1	26	0	0	1	37	0	1	0	6	1	0	0	1	0	0	0	0	1	0	6	0	1	1	0	0	0	0	0	0	6	Universiteit	11	0	0	0								Autismespectrum disorder	9	9	0	1
1608	2	1	12	0	0	0	25	1	0	0	6	1	0	0	1	0	0	0	0	1	0	1	1	1	0	0	1	1	1	0	0	3	MBO	4	1	0	0	309.81	2262.3			0	0	0	Posttraumatische stress disorder(incl.PTSS bij kinderen 6jr en jonger) met uitgesl	4	11	0	0
1609	1	1	14	0	0	0	32	1	0	0	6	1	0	0	1	0	0	0	0	1	0	1	1	1	0	0	1	1	1	0	0	4	MBO-2	4	0	0	0	299	314.01			0	0	0	Niet aanwezig	0	0	1	0
1610	1	1	19	0	0	1	36	0	1	0	6	1	0	0	1	0	0	0	0	1	0	3	1	1	0	1	0	0	0	0	0	4	MDGO Vz	7	0	0	0								Niet aanwezig	0	0	0	1
1611	2	1	26	0	0	2	63	0	0	1	6	1	0	0	1	0	0	0	0	1	0	2	0	1	1	0	0	0	0	0	0	5	HAVO	8	0	0	0	314	0	301.83	0	0	0	0	Personality disorder nao	6	0	1	0
1612	1	1	23	0	0	0	31	1	0	0	6	1	0	0	1	0	0	0	0	1	0	1	0	1	1	0	0	0	0	0	0	4	MBO-4	7	0	0	0	300				0	0	0	Anxiety disorder NAO	4	2	0	0
1613	1	1	28	0	0	1	40	0	1	0	6	1	0	0	1	0	0	0	0	1	0	2	0	1	1	0	0	0	0	0	0	5	HBO	10	0	0	0								Niet aanwezig	0	0	0	1
1614	1	1	23	0	0	0	31	1	0	0	6	1	0	0	1	0	0	0	0	1	0	3	0	1	1	0	0	0	0	0	0	4	HBO	10	0	0	0								Aandachtsdeficientie-/hyperactiviteits disorder:overwegend hyperactief-impulsief beeld	9	9	1	1
1615	2	1	28	0	0	0	34	1	0	0	6	1	0	0	1	0	0	0	0	1	0	2	0	1	1	0	0	0	0	0	0	5	HAVO	8	0	0	0								Borderline personality disorder	6	0	0	1
1616	1	1	27	0	0	0	24	1	0	0	6	1	0	0	1	0	0	0	0	1	0	1	0	1	1	0	0	0	1	0	0	4	MBO	4	1	0	0								Aandachtstekort disorder	9	9	1	1
1617	1	1	25	0	0	0	21	1	0	0	6	1	0	0	1	0	0	0	0	1	0	1	0	1	1	0	0	0	1	0	0	4	MBO-3	5	0	0	0	300.9	2262.3			0	0	0	Niet aanwezig	0	0	0	0
1618	1	1	11	0	0	1	42	0	1	0	6	1	0	0	1	0	0	0	0	1	0	1	1	1	0	0	1	1	0	0	0	4	HBO	10	0	0	0								Niet aanwezig	0	0	0	1
1619	1	1	21	0	0	0	30	1	0	0	6	1	0	0	1	0	0	0	0	1	0	1	0	1	1	0	0	0	1	0	0	5	MBO-3	5	0	0	0								Aandachtsdeficientie-/hyperactiviteits disorder:gecombineerd beeld	9	9	1	1
1620	1	1	26	0	0	1	40	0	1	0	6	1	0	0	1	0	0	0	0	1	0	1	0	1	1	0	0	0	1	0	1	0	Basisschool	1	0	0	0								Aandachtsdeficiëntie-/hyperactiviteits disorder: overwegend onoplettend beeld	9	9	1	1
1621	1	1	17	0	0	0	33	1	0	0	6	1	0	0	1	0	0	0	0	1	0	1	1	1	0	1	0	0	0	0	0	4	MBO-4 jarig	7	0	0	0	311				0	0	0	Andere gespecificeerde depressieve-stemmings disorder	3	3	0	0
1622	2	1	26	0	0	1	55	0	1	0	6	1	0	0	1	0	0	0	0	1	0	2	0	1	1	0	0	0	1	0	0	3	MBO	4	1	0	0								Niet aanwezig	0	0	0	1
1623	2	1	20	0	0	0	35	1	0	0	6	1	0	0	1	0	0	0	0	1	0	1	0	1	1	0	0	0	1	0	0	3	Basisschool	1	0	0	0								Ongespecificeerde persoonlijkheids disorder	6	0	0	1
1624	1	1	21	0	0	0	33	1	0	0	6	1	0	0	1	0	0	0	0	1	0	1	0	1	1	0	0	0	0	0	0	4	MAVO	6	0	0	0									0	0	0	1
1625	1	1	18	0	0	0	27	1	0	0	6	1	0	0	1	0	0	0	0	1	0	1	1	1	0	1	0	0	1	0	0	4	VMBO	4	1	0	0								Niet aanwezig	0	0	0	1
1626	2	1	28	0	0	0	22	1	0	0	6	1	0	0	1	0	0	0	0	1	0	1	0	1	1	0	0	0	0	0	0	6	WO	11	0	0	0	296.22	300.23			0	0	0	Depressieve disorder:eenmalige episode-matig	3	3	0	0
1627	1	1	27	0	0	1	49	0	1	0	6	1	0	0	1	0	0	0	0	1	0	3	0	1	1	0	0	0	0	0	0	4	MAVO	6	0	0	0								Niet aanwezig	0	0	0	1
1628	2	1	26	0	0	1	43	0	1	0	6	1	0	0	1	0	0	0	0	1	0	2	0	1	1	0	0	0	0	0	0	6	HBO Milieukunde	10	0	0	0								Niet aanwezig	0	0	0	1
1629	2	1	23	0	0	1	43	0	1	0	6	1	0	0	1	0	0	0	0	1	0	3	0	1	1	0	0	0	1	0	0	2	Basisschool	1	0	0	0	309.81	296.32	301.83	301.9	0	0	0	Borderline personality disorder en PTSS	6	11	0	0
1630	2	1	15	0	0	0	24	1	0	0	6	1	0	0	1	0	0	0	0	1	0	1	1	1	0	0	1	1	0	0	0	4	VMBO-T	6	0	0	0								Sociale fobie	4	2	0	1
1631	2	1	28	0	0	1	49	0	1	0	6	1	0	0	1	0	0	0	0	1	0	2	0	1	1	0	0	0	0	0	0	4	HBO	10	0	0	0								Depressieve disorder:eenmalige episode-Gedeeltelijk in remissie	3	3	0	1
1632	1	1	99	1	0	0	35	1	0	0	6	1	0	0	1	0	0	0	0	1	0	2	99	0	9	9	9	9	0	1	1	0	WO in buitenland	11	0	0	0								Depressieve disorder:recidiverende episode-matig	3	3	0	1
1633	2	1	19	0	0	1	41	0	1	0	6	1	0	0	1	0	0	0	0	1	0	1	1	1	0	1	0	0	1	0	0	4	LHNO	4	0	0	0								Borderline personality disorder	6	0	0	1
1634	2	1	25	0	0	0	32	1	0	0	6	1	0	0	1	0	0	0	0	1	0	1	0	1	1	0	0	0	0	0	0	4	MBO-4	7	0	0	0								Gegeneraliseerde-angst disorder	4	2	0	1
1635	2	1	28	0	0	1	48	0	1	0	6	1	0	0	1	0	0	0	0	1	0	2	0	1	1	0	0	0	0	0	0	5	HAVO	8	0	0	0	995.81	2261.8	301.9		0	0	0	Andere gespecificeerde persoonlijkheids disorder	6	0	0	0
1636	2	1	21	0	0	0	26	1	0	0	6	1	0	0	1	0	0	0	0	1	0	1	0	1	1	0	0	0	0	0	0	4	MBO nivo 4	7	0	0	0	300.3	293.9			0	0	0	Obsessjeve-compulsieve disorder	4	2	0	0
1637	2	1	21	0	0	0	33	1	0	0	6	1	0	0	1	0	0	0	0	1	0	1	0	1	1	0	0	0	0	0	0	5	HBO	10	0	0	0								Depressieve disorder:recidiverend, niet-gespecificeerd	3	3	0	1
1638	1	1	20	0	0	0	24	1	0	0	6	1	0	0	1	0	0	0	0	1	0	1	0	1	1	0	0	0	1	0	0	4	VMBO 2	4	0	0	0								Niet aanwezig	0	0	0	1
1639	1	1	28	0	0	2	61	0	0	1	6	1	0	0	1	0	0	0	0	1	0	6	0	1	1	0	0	0	0	0	0	6	WO	11	0	0	0								Niet aanwezig	0	0	0	1
1640	1	1	23	0	0	1	38	0	1	0	6	1	0	0	1	0	0	0	0	1	0	2	0	1	1	0	0	0	1	0	0	5	MBO 2	4	0	0	0	296.32	2262.2			0	0	0	Niet aanwezig	0	0	0	0
1641	2	1	26	0	0	0	31	1	0	0	6	1	0	0	1	0	0	0	0	1	0	2	0	1	1	0	0	0	0	0	0	6	Master	11	0	0	0	299				0	0	0	Autismespectrum disorder	9	9	1	0
1642	1	1	24	0	0	1	52	0	1	0	6	1	0	0	1	0	0	0	0	1	0	3	0	1	1	0	0	0	0	0	0	5	HAVO	8	0	0	0								Narcistische persoonlijkheids disorder	6	0	0	1
1643	1	1	99	1	0	1	47	0	1	0	6	1	0	0	1	0	0	0	0	1	0	1	99	0	9	9	9	9	1	1	1	0	geen	0	0	99	99								Depressieve disorder:eenmalige episode-matig	3	3	0	1
1644	2	1	99	1	0	0	35	1	0	0	6	1	0	0	1	0	0	0	0	1	0	3	99	0	9	9	9	9	1	1	1	0	geen	0	0	99	99								Posttraumatische stress disorder (incl. de posttraumatische-stress disorder bij kinderen van 6 jaar en jonger)	4	11	0	1
1645	2	1	23	0	0	1	56	0	1	0	6	1	0	0	1	0	0	0	0	1	0	2	0	1	1	0	0	0	1	0	0	4	Huishoudschool	4	0	0	0								Dwangmatige persoonlijkheids disorder	6	0	0	1
1646	2	1	28	0	0	1	54	0	1	0	6	1	0	0	1	0	0	0	0	1	0	1	0	1	1	0	0	0	0	0	0	4	HBO PABO	10	0	0	0								Niet aanwezig	0	0	0	1
1647	2	1	25	0	0	1	41	0	1	0	6	1	0	0	1	0	0	0	0	1	0	2	0	1	1	0	0	0	1	0	0	4	MBO	4	1	0	0								Posttraumatische stress disorder (incl. de posttraumatische-stress disorder bij kinderen van 6 jaar en jonger)	4	11	0	1
1648	2	1	26	0	0	1	49	0	1	0	6	1	0	0	1	0	0	0	0	1	0	6	0	1	1	0	0	0	0	0	0	6	HBO MW	10	0	0	0								Niet aanwezig	0	0	0	1
1649	2	1	21	0	0	1	37	0	1	0	6	1	0	0	1	0	0	0	0	1	0	3	0	1	1	0	0	0	1	0	0	4	LBO dierenhouderij	4	0	0	0								Persisterende depressieve disorder (dysthymie)	3	3	0	1
1650	1	1	17	0	0	1	45	0	1	0	6	1	0	0	1	0	0	0	0	1	0	6	1	1	0	1	0	0	1	0	0	3	LTS	4	0	0	0	296.32	2262.2			0	0	0	Depressieve disorder:recidiverende episode-matig	3	3	0	0
1651	1	1	28	0	0	1	46	0	1	0	6	1	0	0	1	0	0	0	0	1	0	2	0	1	1	0	0	0	0	0	0	5	HAVO	8	0	0	0								Paniek disorder	4	2	0	1
1652	2	1	18	0	0	0	33	1	0	0	6	1	0	0	1	0	0	0	0	1	0	2	1	1	0	1	0	0	1	0	0	2	Lagere school	1	0	0	0	300.01				0	0	0	Paniek disorder zonder agorafobie	4	2	0	0
1653	1	1	22	0	0	2	62	0	0	1	6	1	0	0	1	0	0	0	0	1	0	2	0	1	1	0	0	0	0	0	0	7	MTS	7	0	0	0	296.31	2261.8			0	0	0	Depressieve disorder:recidiverend, Licht	3	3	0	0
1654	2	1	99	1	0	1	40	0	1	0	6	1	0	0	1	0	0	0	0	1	0	3	99	0	9	9	9	9	1	1	1	0	geen	0	0	99	99								Posttraumatische stress disorder(incl.de posttraumatische-stress disorder bij kinderen van 6 jaar en jonger)	4	11	0	1
1655	1	1	28	0	0	1	47	0	1	0	6	1	0	0	1	0	0	0	0	1	0	2	0	1	1	0	0	0	0	0	0	6	Universiteit	11	0	0	0								Niet aanwezig	0	0	0	1
1656	2	1	28	0	0	0	35	1	0	0	6	1	0	0	1	0	0	0	0	1	0	2	0	1	1	0	0	0	0	0	0	4	HBO	10	0	0	0	296.21	2262.2			0	0	0	Depressieve disorder:eenmalige episode-licht	3	3	0	0
1657	1	1	23	0	0	0	23	1	0	0	6	1	0	0	1	0	0	0	0	1	0	1	0	1	1	0	0	0	1	0	0	4	MBO	4	1	0	0	312.9	314	301.9		0	0	0	Andere gespecificeerde psychische disorder	9	9	1	0
1658	1	1	27	0	0	1	42	0	1	0	6	1	0	0	1	0	0	0	0	1	0	2	0	1	1	0	0	0	1	0	0	4	MBO	4	1	0	0								Niet aanwezig	0	0	0	1
1659	2	1	17	0	0	0	29	1	0	0	6	1	0	0	1	0	0	0	0	1	0	1	1	1	0	1	0	0	1	0	0	4	MBO	4	1	0	0	314	303.9			0	0	0	Aandachtsdeficiëntie-/hyperactiviteits disorder: overwegend onoplettend beeld	9	9	1	0
1660	2	1	22	0	0	1	40	0	1	0	6	1	0	0	1	0	0	0	0	1	0	6	0	1	1	0	0	0	1	0	0		Basisschool	1	0	0	0								Persoonlijkheids disorder NAO 2013	6	0	0	1
1661	2	1	23	0	0	1	49	0	1	0	6	1	0	0	1	0	0	0	0	1	0	2	0	1	1	0	0	0	1	0	0	2	Basisschool	1	0	2	0								Niet aanwezig	0	0	0	1
1662	2	1	26	0	0	1	38	0	1	0	6	1	0	0	1	0	0	0	0	1	0	2	0	1	1	0	0	0	0	0	0	6	VWO	9	0	0	0		296.32	301.9		0	0	0	Ongespecificeerde persoonlijkheids disorder	6	0	0	1
1663	2	1	20	0	0	0	22	1	0	0	6	1	0	0	1	0	0	0	0	1	0	6	0	1	1	0	0	0	1	0	0	4	Praktijkonderwijs 1	4	0	0	0								Niet aanwezig	0	0	0	1
1664	1	1	26	0	0	0	28	1	0	0	6	1	0	0	1	0	0	0	0	1	0	1	0	1	1	0	0	0	0	0	0	5	HAVO + MBO4	8	0	0	0								Niet aanwezig	0	0	0	1
1665	2	1	21	0	0	0	28	1	0	0	6	1	0	0	1	0	0	0	0	1	0	3	0	1	1	0	0	0	1	0	0	5	MBO	4	1	0	0	296.32		301.9		0	0	0	Depressieve disorder:eenmalige episode-matig	3	3	0	0
1666	1	1	24	0	0	0	32	1	0	0	6	1	0	0	1	0	0	0	0	1	0	1	0	1	1	0	0	0	1	0	0	4	MBO	4	1	0	0	309.81		301.9		0	0	0	Posttraumatische stress disorder(incl. de PTSS bij kinderen van 6jr en jonger)	4	11	0	0
1667	2	1	21	0	0	0	35	1	0	0	6	1	0	0	1	0	0	0	0	1	0	2	0	1	1	0	0	0	1	0	0	4	MBO beveiliging	4	1	0	0								Depressieve disorder:recidiverende episode-licht	3	3	0	1
1668	1	1	99	0	0	1	44	0	1	0	6	1	0	0	1	0	0	0	0	1	0	99	99	0	9	9	9	9	9	99	99			99	99	99	99	291.9	291.9	301.83	0	0	0	0	Borderline persoonlijkheidsstoorn.	1	8	0	0
1669	2	1	25	0	0	0	29	1	0	0	6	1	0	0	1	0	0	0	0	1	0	2	0	1	1	0	0	0	1	0	0	4	MBO	4	1	0	0								Depressieve disorder:Eenmalige episode, Matig	3	3	0	1
1670	1	1	99	0	0	1	44	0	1	0	6	1	0	0	1	0	0	0	0	1	0	99	99	0	9	9	9	9	9	99	99			99	99	99	99									0	0	0	1
1671	1	1	99	0	0	1	56	0	1	0	6	1	0	0	1	0	0	0	0	1	0	99	99	0	9	9	9	9	9	99	99			99	99	99	99									0	0	0	1
1672	2	1	99	0	0	0	25	1	0	0	6	1	0	0	1	0	0	0	0	1	0	99	99	0	9	9	9	9	9	99	99			99	99	99	99	296.8	0	2271.09	0	0	0	0	Bipol.I st. mst rct.epi.man.ern.z.p	3	4	0	0
1673	2	1	99	0	0	0	25	1	0	0	6	1	0	0	1	0	0	0	0	1	0	99	99	0	9	9	9	9	9	99	99			99	99	99	99								Stemmings disordersen	3	3	0	1
1674	2	1	25	0	0	0	30	1	0	0	6	1	0	0	1	0	0	0	0	1	0	1	0	1	1	0	0	0	1	0	0	3	MBO	4	1	0	0								Ongespecificeerde persoonlijkheids disorder	6	0	0	1
1675	1	1	99	0	0	1	40	0	1	0	6	1	0	0	1	0	0	0	0	1	0	99	99	0	9	9	9	9	9	99	99			99	99	99	99	300.9	300			0	0	0	Anxiety disorder NAO	4	2	0	0
1676	2	1	99	0	0	2	62	0	0	1	6	1	0	0	1	0	0	0	0	1	0	99	99	0	9	9	9	9	9	99	99			99	99	99	99									0	0	0	1
1677	2	1	99	0	0	0	25	1	0	0	6	1	0	0	1	0	0	0	0	1	0	99	99	0	9	9	9	9	9	99	99			99	99	99	99									0	0	0	1
1678	2	1	23	0	0	0	32	1	0	0	6	1	0	0	1	0	0	0	0	1	0	99	0	1	1	0	0	0	0	99	99			10	99	0	0									0	0	0	1
1679	1	1	26	0	0	0	32	1	0	0	6	1	0	0	1	0	0	0	0	1	0	6	0	1	1	0	0	0	1	0	0	5	MBO	4	1	0	0								Ongespecificeerde persoonlijkheids disorder	6	0	0	1
1680	2	1	25	0	0	1	53	0	1	0	6	1	0	0	1	0	0	0	0	1	0	2	0	1	1	0	0	0	0	0	0	5	HBO	10	0	0	0	311	300.02			0	0	0	Depressieve disorder: eenmalige episode - Ongespecificeerd	3	3	0	0
1681	2	1	99	0	0	1	40	0	1	0	6	1	0	0	1	0	0	0	0	1	0	2	99	0	9	9	9	9	0	0	0	6	HBO	10	0	0	0								Vermijdende persoonlijkheids disorder	6	0	0	1
1682	1	1	99	0	0	1	54	0	1	0	6	1	0	0	1	0	0	0	0	1	0	99	99	0	9	9	9	9	9	99	99			99	99	99	99									0	0	0	1
1683	1	1	99	0	0	2	60	0	0	1	6	1	0	0	1	0	0	0	0	1	0	2	99	0	9	9	9	9	1	1	1	4	MBO	4	1	0	0	311	2262.2			0	0	0	Depressieve disorder NAO	3	3	0	0
1684	2	1	22	0	0	1	53	0	1	0	6	1	0	0	1	0	0	0	0	1	0	4	0	1	1	0	0	0	1	0	0	4	LHNO	4	0	0	0	309.4		301.9		0	0	0	Andere gespecificeerde persoonlijkheids disorder	6	0	0	0
1685	2	1	28	0	0	1	51	0	1	0	6	1	0	0	1	0	0	0	0	1	0	1	0	1	1	0	0	0	0	0	0	6	WO	11	0	0	0								Depressieve disorder: recidiverende episode - matig	3	3	0	1
1686	2	1	21	1	0	1	42	0	1	0	6	1	0	0	1	0	0	0	0	1	0	3	0	1	1	0	0	0	0	0	0	4	MAvo	6	0	0	0									0	0	0	1
1687	1	1	21	0	0	1	43	0	1	0	6	1	0	0	1	0	0	0	0	1	0	3	0	1	1	0	0	0	1	0	1	0	Basisschool	1	0	0	0								avoidant personality disorder	6	0	0	1
1688	2	1	16	0	0	0	25	1	0	0	6	1	0	0	1	0	0	0	0	1	0	1	1	1	0	1	0	0	1	0	0	4	VMBO kader	4	0	2	0								Depressieve disorder: eenmalige episode - matig	3	3	0	1
1689	1	1	26	0	0	0	33	1	0	0	6	1	0	0	1	0	0	0	0	1	0	6	0	1	1	0	0	0	0	0	0	4	MTS nivo 4	7	0	0	0								Persisterende depressieve disorder (dysthymie)	3	3	0	1
1690	2	1	99	0	0	1	47	0	1	0	6	1	0	0	1	0	0	0	0	1	0	6	99	0	9	9	9	9	0	0	0	5	havo	8	0	0	0	300.9	0	799.9	301.4	0	0	0	Ongespecificeerde psychische disorder	0	1	0	0
1691	2	1	24	0	0	1	58	0	1	0	6	1	0	0	1	0	0	0	0	1	0	4	0	1	1	0	0	0	0	0	0	5	RIVA Z-verpleegkunde	7	0	0	0	296.52	0	2271.09	0	0	0	0	Bipolaire-I disorder:actuele of meest recente episode depressief-matig	3	4	0	0
1692	2	1	23	0	0	1	46	0	1	0	6	1	0	0	1	0	0	0	0	1	0	3	0	1	1	0	0	0	0	0	0	4	HBO	10	0	0	0	309.81				0	0	0	Posttraumatische stress disorder(incl. de PTSS bij kinderen van 6jr en jonger)	4	11	0	0
1693	1	1	22	0	0	1	38	0	1	0	6	1	0	0	1	0	0	0	0	1	0	1	0	1	1	0	0	0	0	0	0	3	mbo-4	7	0	0	0								Depressieve disorder: recidiverende episode - matig	3	3	0	1
1694	2	1	17	0	0	2	64	0	0	1	6	1	0	0	1	0	0	0	0	1	0	2	1	1	0	1	0	0	1	0	0	4	speciale huishoudschool (vrouwenarbeidsschool)	4	0	0	0	309.81				0	0	0	Posttraumatische stress disorder (incl. de posttraumatische-stress disorder bij kinderen van 6 jaar en jonger)	4	11	0	0
1695	2	1	24	0	0	2	61	0	0	1	6	1	0	0	1	0	0	0	0	1	0	1	0	1	1	0	0	0	0	0	0	4	HBO	10	0	0	0								niet aanwezig	0	0	0	1
1696	1	1	25	0	0	1	39	0	1	0	6	1	0	0	1	0	0	0	0	1	0	1	0	1	1	0	0	0	0	0	0	4	MEAO/MBA	7	0	0	0	299	0	2271.09	0	0	0	0	Autismespectrum disorder	9	9	1	0
1697	2	1	26	0	0	1	47	0	1	0	6	1	0	0	1	0	0	0	0	1	0	3	0	1	1	0	0	0	0	0	0	5	MBO-4	7	0	0	0	296.32			301.82	0	0	0	Depressieve disorder: recidiverende episode - matig	3	3	0	0
1698	2	1	24	0	0	0	31	1	0	0	6	1	0	0	1	0	0	0	0	1	0	2	0	1	1	0	0	0	0	0	0	4	MBO4	7	0	0	0	309.81	0	301.82	301.4	0	0	0	avoidant personality disorder	6	0	0	0
1699	1	1	21	0	0	1	52	0	1	0	6	1	0	0	1	0	0	0	0	1	0	1	0	1	1	0	0	0	0	0	0	5	Havo+MEAO	8	0	0	0									0	0	0	1
1701	2	1	17	0	0	1	40	0	1	0	6	1	0	0	1	0	0	0	0	1	0	2	1	1	0	1	0	0	1	0	0	6	MBO kort verzorging	4	1	0	0	299	300.3	2271.09	0	0	0	0	Autistische disorder	9	9	1	0
1702	1	1	25	0	0	1	39	0	1	0	6	1	0	0	1	0	0	0	0	1	0	1	0	1	1	0	0	0	1	0	0	2	LTS	4	0	0	0	314.01	296.22			0	0	0	Aandachtsdeficiëntie-/hyperactiviteits disorder: overwegend hyperactief-impulsief beeld - gedeeltelijk in remissie	9	9	1	0
1703	1	1	12	0	0	0	27	1	0	0	6	1	0	0	1	0	0	0	0	1	0	3	1	1	0	0	1	1	1	0	0		speciaal onderwijs	3	0	0	0								Ongespecificeerde disruptieve, impulsbeheersings- of andere gedrags disorder en Zwakbegaafdheid (Hoofddiagnose niet bekend)	9	9	0	1
1704	1	1	20	0	0	0	34	1	0	0	6	1	0	0	1	0	0	0	0	1	0	2	0	1	1	0	0	0	1	0	0	0	BBL	4	0	0	0									0	0	0	1
1705	2	1	27	0	0	1	39	0	1	0	6	1	0	0	1	0	0	0	0	1	0	6	0	1	1	0	0	0	0	0	0	5	HBO	10	0	0	0								Depressieve disorder: recidiverende episode-matig	3	3	0	1
1706	2	1	20	0	0	0	25	1	0	0	6	1	0	0	1	0	0	0	0	1	0	1	0	1	1	0	0	0	0	0	0	4	MBO-4	7	0	0	0									0	0	0	1
1707	1	1	25	0	0	0	35	1	0	0	6	1	0	0	1	0	0	0	0	1	0	3	0	1	1	0	0	0	1	0	0	7	LTS	4	0	0	0	314.01	314.01	301.83		0	0	0	Aandachtsdeficiëntie-/hyperactiviteits disorder: overwegend hyperactief-impulsief beeld	9	9	1	0
1709	1	1	23	0	0	0	34	1	0	0	6	1	0	0	1	0	0	0	0	1	0	1	0	1	1	0	0	0	0	0	0	4	Mavo-D9 soort havo	8	0	0	0								niet aanwezig	0	0	0	1
1710	2	1	19	0	0	0	31	1	0	0	6	1	0	0	1	0	0	0	0	1	0	1	1	1	0	1	0	0	1	0	0	4	MBO	4	1	0	0									0	0	0	1
1711	2	1	26	0	0	0	32	1	0	0	6	1	0	0	1	0	0	0	0	1	0	1	0	1	1	0	0	0	0	0	0	5	HBO	10	0	0	0	300	307.5	301.9		0	0	0	Posttraumatische stress disorder (incl. de posttraumatische-stress disorder bij kinderen van 6 jaar en jonger): met uitges	4	11	0	0
1713	1	1	19	0	0	1	44	0	1	0	6	1	0	0	1	0	0	0	0	1	0	2	1	1	0	1	0	0	1	0	0	4	MBO3	5	0	0	0								Aandachtsdeficiëntie-/hyperactiviteits disorder: overwegend onoplettend beeld	9	9	1	1
1715	1	1	25	0	0	0	28	1	0	0	6	1	0	0	1	0	0	0	0	1	0	1	0	1	1	0	0	0	1	0	0	4	VMBO + fitnesstrainer	4	1	0	0	299				0	0	0	Autismespectrum disorder	9	9	1	0
1716	2	1	99	0	0	1	39	0	1	0	6	1	0	0	1	0	0	0	0	1	0	1	99	0	9	9	9	9	1	0	0		VBO	4	0	0	0	295.9				0	0	0	schizophrenia	2	6	0	0
1717	2	1	26	0	0	1	45	0	1	0	6	1	0	0	1	0	0	0	0	1	0	2	0	1	1	0	0	0	0	0	0	4	MBO4	6	0	0	0								Ongespecificeerde obsessieve-compulsieve of verwante disorder	9	9	0	1
1718	2	1	17	0	0	0	34	1	0	0	6	1	0	0	1	0	0	0	0	1	0	2	1	1	0	1	0	0	0	0	0	3	MBO3	7	0	2	0	307.5	0	301.83	0	0	0	0	Depressieve disorder: recidiverende episode - matig	3	3	0	0
[truncated: 71 more columns]

## Sheet: variable_dsecription
order number	casenum
gender	male=0	female=1
first case	count variable
SCILscore
ethnic_minority	0=no minority 1=minority
type_ward	0=outpatient 1=admission 2=fact 3=long stay
age_cat	0=0-35, 1=35-60, 2=60+
age	real age
young	<35
middle	35-60
elderly	>60
wards	ward number
inclusion	included
matchsequence_interview	case_numbering
wardtype	type of ward
outpatient_dummy	1=outpatient ward
admission_dummy	1=admission ward
fact_dummy	1=fact_ward
Longstay_dummy	1=long stay ward
wardtype_opn_fact	1=wardtype admission and fact
PrimaryFirst	count variable
MatchSequence	count variable
marital_status	1=partner, 0=no partner
indic_BIF	1=BIF. 0=no BIF
SCIL_assessed	SCIL assessed
Scil_negative	SCIL>19
Scil_positiev	SCIL<19
scil_pos15_less	SCIL<15
scil15	SCIL<15
educational_level	0=less elimentary 1=elimetary 2=high school
elimentary_school
high_school
Number_years_school
Highest_school_level
Code_high_school
Doubt_education
Writing
Reading
axis1_1_last	code axis 1_1 DSM IV
axis1_2_last	code axis 1_2 DSM IV
axis_2_1_last	code axis 2_1 DSM IV
axis2_2_last	code axis 2_1 DSM IV
hdiag_as1_last
hdiag_as2_last
hdiag_last
Main_diagnosis	text content diagnosis
ICD10
severity_highest_as1
Developmental_disorder	1=delelopmental		0=else
No_disorder	1=no		0=else
else	1=else		0=else
anxiety	1=anxiety		0=else
adjustment	1=adjustment disorder		0=else
depression	1=deperession		0=else
PTSD	1=PTSD		0=else
eating_disorder	1=eating disorder		0=else
bipolar	1=bipolar disorder		0=else
other_psychotic	1=psychotic disorder		0=else
schizophrenia	1=schizophrenia		0=else
autism	1=autism		0=else
Drug_abuse_disorder	1=drug abuse disorder		0=else
Mental_handicap	1=mental handicap		0=else
Personality_disorder	1=personality disorder		0=else
lowgaf	1=low GAF		0=else
Assessment_scil	1=assessed
cognitief_decay	1=cognitive decay		0=else
scilgroepen	0=>19, 1=16-19, 2=<15
Reden_geen_afname_	tekst variable
SCIL_Q_1	question 1 scil
SCIL_Q_2	question 2 scil
SCIL_Q_3	question 3 scil
SCIL_Q_4	question 4 scil
SCIL_Q_5	question 5 scil
SCIL_Q_6	question 6 scil
SCIL_Q_7	question 7 scil
SCIL_Q_8	question 8 scil
SCIL_Q_9	question 9 scil
SCIL_Q_10	question 10 scil
SCIL_Q_11a	question 11a scil
SCIL_Q_11b	question 11b scil
SCIL_Q_12a	question 12a scil
SCIL_Q_12b	question 12b scil
SCIL_Q_13	question 13 scil
SCIL_Q_14	question 14 scil
N_BREAK	number of cases
dd_diagnose_last	date diagnosis
dd_diagnose_first	date first diagnosis
gaf_first	first gaf score
gaf_last	most recent gaf score
male	control variable
GAF_score	basic gaf score
filter_$	filter variable
Low_education	1=low education
Total_admissiondays_since_treatment_sum	Number of admissions since treatment
AIM_self_max	aim of agression self
AIM_not_self_max	aim of agression not self
aggression	agression_dummy 1
agression	agression_dummy 2
aggressive	agression_dummy_3
physical_maximum	1=physical agression
phyisical_max	1=physical agression control
Number_incidents_total	total number of incidents
N_inc_Clinical	number of clinical incidents
N_inc_outpatient	number of outpatient incidents
num_incident_not_self	number of incidents not on self
not_self_clincial	number of incidents not on self clincial
not_self_outpatient	number of incidents not on self outatient
incident_category_phsical	incidents with a physical component
Agressie_severity_mean	severity of agression with soas r
Agression_severity_maximum_SOAS_1	soas r 1st item
Provocation_maximum_SOAS_2	soas r 2nd item
Means_maximum_SOAS_3	soas r 3rd item
IM_maximum_SOAS_4	soas r 4th item
Consequences_maximum_SOAS_5	soas r 5th item
Measures_maximum_SOAS_6	soas r 6th item
Seclusion_maximum_SOAS_7	soas r 7th item
Restraint_maximum_SOAS_8	soas r 8th item
Orale_med_maximum_SOAS_9	soas r 9th item
Parenteraal_maximum_SOAS_10	soas r 10th item
N_inc_physical_agress	number of items physical agression
N_inc_nophysical_agress	number of items no physical agression
