# Supplementary material for: Aggressive behaviour of psychiatric patients with mild and borderline intellectual disabilities in general mental health care
Source: PLoS One. 2022 Oct 3;17(10):e0272502. doi: 10.1371/journal.pone.0272502 (PMC9529125; doi:10.1371/journal.pone.0272502)
Supplement: S2 Data — (XLSX) [file pone.0272502.s002.xlsx]

## Sheet: variable_dsecription
order number	casenum
gender	male=0	female=1
first case	count variable
SCILscore
ethnic_minority	0=no minority 1=minority
type_ward	0=outpatient 1=admission 2=fact 3=long stay
age_cat	0=0-35, 1=35-60, 2=60+
age	real age
young	<35
middle	35-60
elderly	>60
wards	ward number
inclusion	included
matchsequence_interview	case_numbering
wardtype	type of ward
outpatient_dummy	1=outpatient ward
admission_dummy	1=admission ward
fact_dummy	1=fact_ward
Longstay_dummy	1=long stay ward
wardtype_opn_fact	1=wardtype admission and fact
PrimaryFirst	count variable
MatchSequence	count variable
marital_status	1=partner, 0=no partner
indic_BIF	1=BIF. 0=no BIF
SCIL_assessed	SCIL assessed
Scil_negative	SCIL>19
Scil_positiev	SCIL<19
scil_pos15_less	SCIL<15
scil15	SCIL<15
educational_level	0=less elimentary 1=elimetary 2=high school
elimentary_school
high_school
Number_years_school
Highest_school_level
Code_high_school
Doubt_education
Writing
Reading
axis1_1_last	code axis 1_1 DSM IV
axis1_2_last	code axis 1_2 DSM IV
axis_2_1_last	code axis 2_1 DSM IV
axis2_2_last	code axis 2_1 DSM IV
hdiag_as1_last
hdiag_as2_last
hdiag_last
Main_diagnosis	text content diagnosis
ICD10
severity_highest_as1
Developmental_disorder	1=delelopmental		0=else
No_disorder	1=no		0=else
else	1=else		0=else
anxiety	1=anxiety		0=else
adjustment	1=adjustment disorder		0=else
depression	1=deperession		0=else
PTSD	1=PTSD		0=else
eating_disorder	1=eating disorder		0=else
bipolar	1=bipolar disorder		0=else
other_psychotic	1=psychotic disorder		0=else
schizophrenia	1=schizophrenia		0=else
autism	1=autism		0=else
Drug_abuse_disorder	1=drug abuse disorder		0=else
Mental_handicap	1=mental handicap		0=else
Personality_disorder	1=personality disorder		0=else
lowgaf	1=low GAF		0=else
Assessment_scil	1=assessed
cognitief_decay	1=cognitive decay		0=else
scilgroepen	0=>19, 1=16-19, 2=<15
Reden_geen_afname_	tekst variable
SCIL_Q_1	question 1 scil
SCIL_Q_2	question 2 scil
SCIL_Q_3	question 3 scil
SCIL_Q_4	question 4 scil
SCIL_Q_5	question 5 scil
SCIL_Q_6	question 6 scil
SCIL_Q_7	question 7 scil
SCIL_Q_8	question 8 scil
SCIL_Q_9	question 9 scil
SCIL_Q_10	question 10 scil
SCIL_Q_11a	question 11a scil
SCIL_Q_11b	question 11b scil
SCIL_Q_12a	question 12a scil
SCIL_Q_12b	question 12b scil
SCIL_Q_13	question 13 scil
SCIL_Q_14	question 14 scil
N_BREAK	number of cases
dd_diagnose_last	date diagnosis
dd_diagnose_first	date first diagnosis
gaf_first	first gaf score
gaf_last	most recent gaf score
male	control variable
GAF_score	basic gaf score
filter_$	filter variable
Low_education	1=low education
Total_admissiondays_since_treatment_sum	Number of admissions since treatment
AIM_self_max	aim of agression self
AIM_not_self_max	aim of agression not self
aggression	agression_dummy 1
agression	agression_dummy 2
aggressive	agression_dummy_3
physical_maximum	1=physical agression
phyisical_max	1=physical agression control
Number_incidents_total	total number of incidents
N_inc_Clinical	number of clinical incidents
N_inc_outpatient	number of outpatient incidents
num_incident_not_self	number of incidents not on self
not_self_clincial	number of incidents not on self clincial
not_self_outpatient	number of incidents not on self outatient
incident_category_phsical	incidents with a physical component
Agressie_severity_mean	severity of agression with soas r
Agression_severity_maximum_SOAS_1	soas r 1st item
Provocation_maximum_SOAS_2	soas r 2nd item
Means_maximum_SOAS_3	soas r 3rd item
IM_maximum_SOAS_4	soas r 4th item
Consequences_maximum_SOAS_5	soas r 5th item
Measures_maximum_SOAS_6	soas r 6th item
Seclusion_maximum_SOAS_7	soas r 7th item
Restraint_maximum_SOAS_8	soas r 8th item
Orale_med_maximum_SOAS_9	soas r 9th item
Parenteraal_maximum_SOAS_10	soas r 10th item
N_inc_physical_agress	number of items physical agression
N_inc_nophysical_agress	number of items no physical agression
